# Supplementary material
Source: PubMed Central journal article supplement (PMC2190540)

# Synthesis of C-4 and C-7 Triazole Analogs of Zanamivir as Multivalent Sialic Acid

## Containing Scaffolds

Yan Lu and Jacquelyn Gervay-Hague\*

## Supporting Information

|                                              |     |
|----------------------------------------------|-----|
| <sup>1</sup> H NMR spectrum for Compound 8   | S3  |
| <sup>13</sup> C NMR spectrum for Compound 8  | S4  |
| <sup>1</sup> H NMR spectrum for Compound 9   | S5  |
| <sup>13</sup> C NMR spectrum for Compound 9  | S6  |
| <sup>1</sup> H NMR spectrum for Compound 10  | S7  |
| <sup>13</sup> C NMR spectrum for Compound 10 | S8  |
| <sup>1</sup> H NMR spectrum for Compound 11  | S9  |
| <sup>13</sup> C NMR spectrum for Compound 11 | S10 |
| <sup>1</sup> H NMR spectrum for Compound 12  | S11 |
| <sup>13</sup> C NMR spectrum for Compound 12 | S12 |
| <sup>1</sup> H NMR spectrum for Compound 13  | S13 |
| <sup>13</sup> C NMR spectrum for Compound 13 | S14 |
| <sup>1</sup> H NMR spectrum for Compound 14  | S15 |
| <sup>13</sup> C NMR spectrum for Compound 14 | S16 |
| <sup>1</sup> H NMR spectrum for Compound 15  | S17 |
| <sup>13</sup> C NMR spectrum for Compound 15 | S18 |
| <sup>1</sup> H NMR spectrum for Compound 16  | S19 |
| <sup>13</sup> C NMR spectrum for Compound 16 | S20 |
| <sup>1</sup> H NMR spectrum for Compound 17  | S21 |
| <sup>13</sup> C NMR spectrum for Compound 17 | S22 |
| <sup>1</sup> H NMR spectrum for Compound 18  | S23 |
| <sup>13</sup> C NMR spectrum for Compound 18 | S24 |
| <sup>1</sup> H NMR spectrum for Compound 19  | S25 |
| <sup>13</sup> C NMR spectrum for Compound 19 | S26 |
| <sup>1</sup> H NMR spectrum for Compound 20  | S27 |
| <sup>13</sup> C NMR spectrum for Compound 20 | S28 |
| <sup>1</sup> H NMR spectrum for Compound 21  | S29 |
| <sup>13</sup> C NMR spectrum for Compound 21 | S30 |
| <sup>1</sup> H NMR spectrum for Compound 22  | S31 |

|                                                                                    |     |
|------------------------------------------------------------------------------------|-----|
| <sup>13</sup> C NMR spectrum for Compound 22                                       | S32 |
| <sup>1</sup> H NMR spectrum for Compound 23                                        | S33 |
| <sup>13</sup> C NMR spectrum for Compound 23                                       | S34 |
| <sup>1</sup> H NMR spectrum for Compound 24                                        | S35 |
| <sup>13</sup> C NMR spectrum for Compound 24                                       | S36 |
| <sup>1</sup> H NMR spectrum for Compound 25                                        | S37 |
| <sup>13</sup> C NMR spectrum for Compound 25                                       | S38 |
| <sup>1</sup> H NMR spectrum for 2-[2-(2-Azido-ethoxy)-ethoxy]-ethylamine           | S39 |
| <sup>13</sup> C NMR spectrum for Compound 2-[2-(2-Azido-ethoxy)-ethoxy]-ethylamine | S40 |
| <sup>1</sup> H NMR spectrum for Compound 30                                        | S41 |
| <sup>13</sup> C NMR spectrum for Compound 30                                       | S42 |
| <sup>1</sup> H NMR spectrum for Compound 31                                        | S43 |
| <sup>13</sup> C NMR spectrum for Compound 31                                       | S44 |
| <sup>1</sup> H NMR spectrum for Compound 32                                        | S45 |
| <sup>13</sup> C NMR spectrum for Compound 32                                       | S46 |
| <sup>1</sup> H NMR spectrum for Compound 33                                        | S47 |
| <sup>13</sup> C NMR spectrum for Compound 33                                       | S48 |
| <sup>1</sup> H NMR spectrum for Compound 34                                        | S49 |
| <sup>13</sup> C NMR spectrum for Compound 34                                       | S50 |
| <sup>1</sup> H NMR spectrum for Compound 35                                        | S51 |
| <sup>13</sup> C NMR spectrum for Compound 35                                       | S52 |
| <sup>1</sup> H NMR spectrum for Compound 36                                        | S53 |
| <sup>13</sup> C NMR spectrum for Compound 36                                       | S54 |
| <sup>1</sup> H NMR spectrum for Compound 37                                        | S55 |
| <sup>13</sup> C NMR spectrum for Compound 37                                       | S56 |
| <sup>1</sup> H NMR spectrum for Compound 38                                        | S57 |
| <sup>13</sup> C NMR spectrum for Compound 38                                       | S58 |

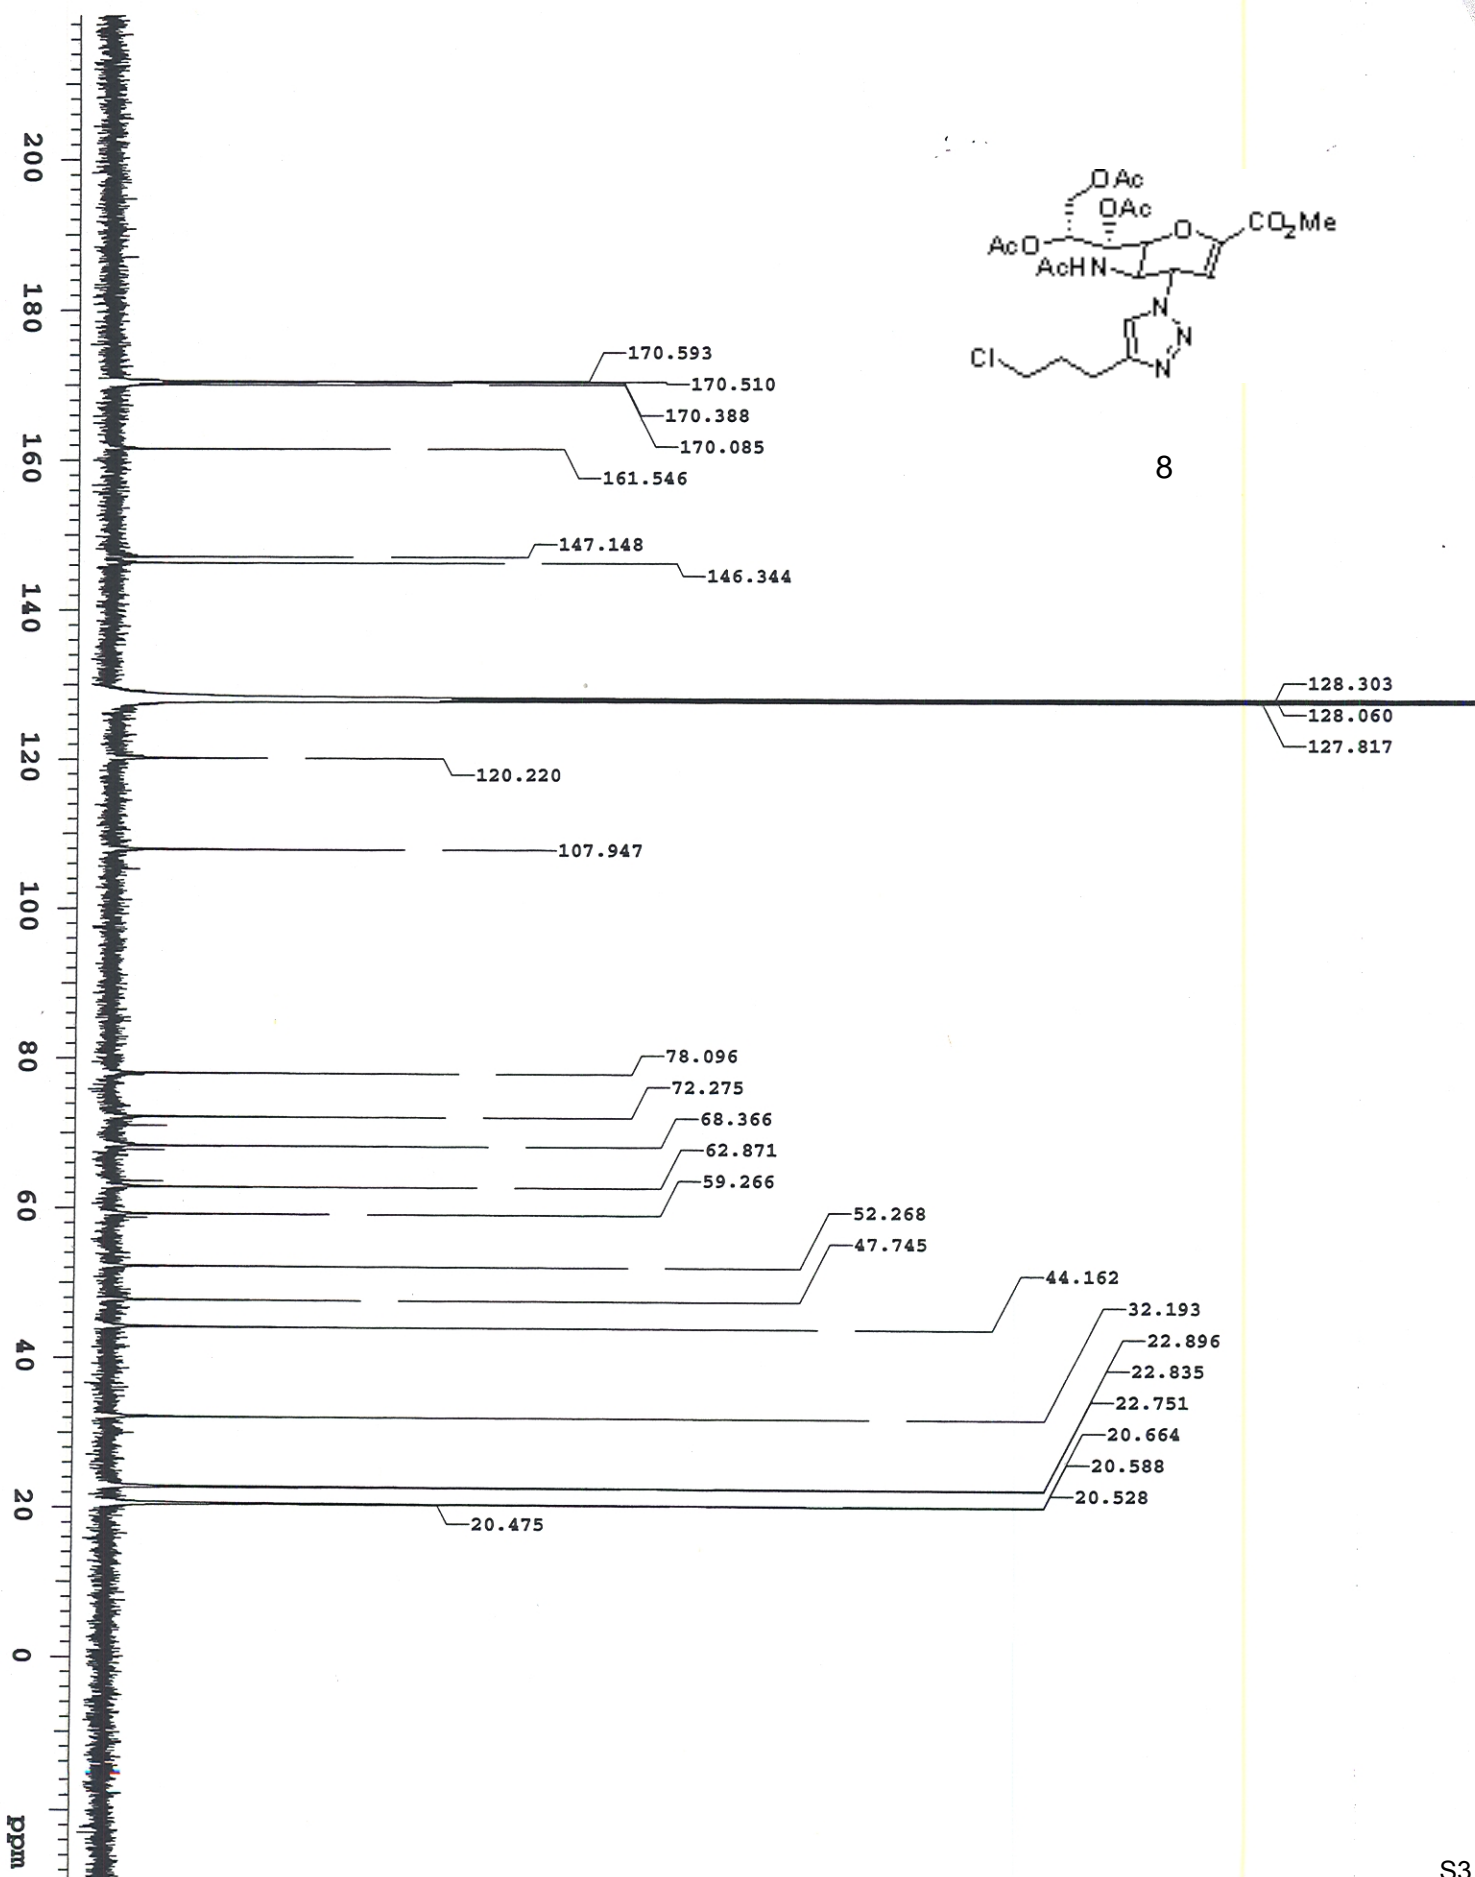

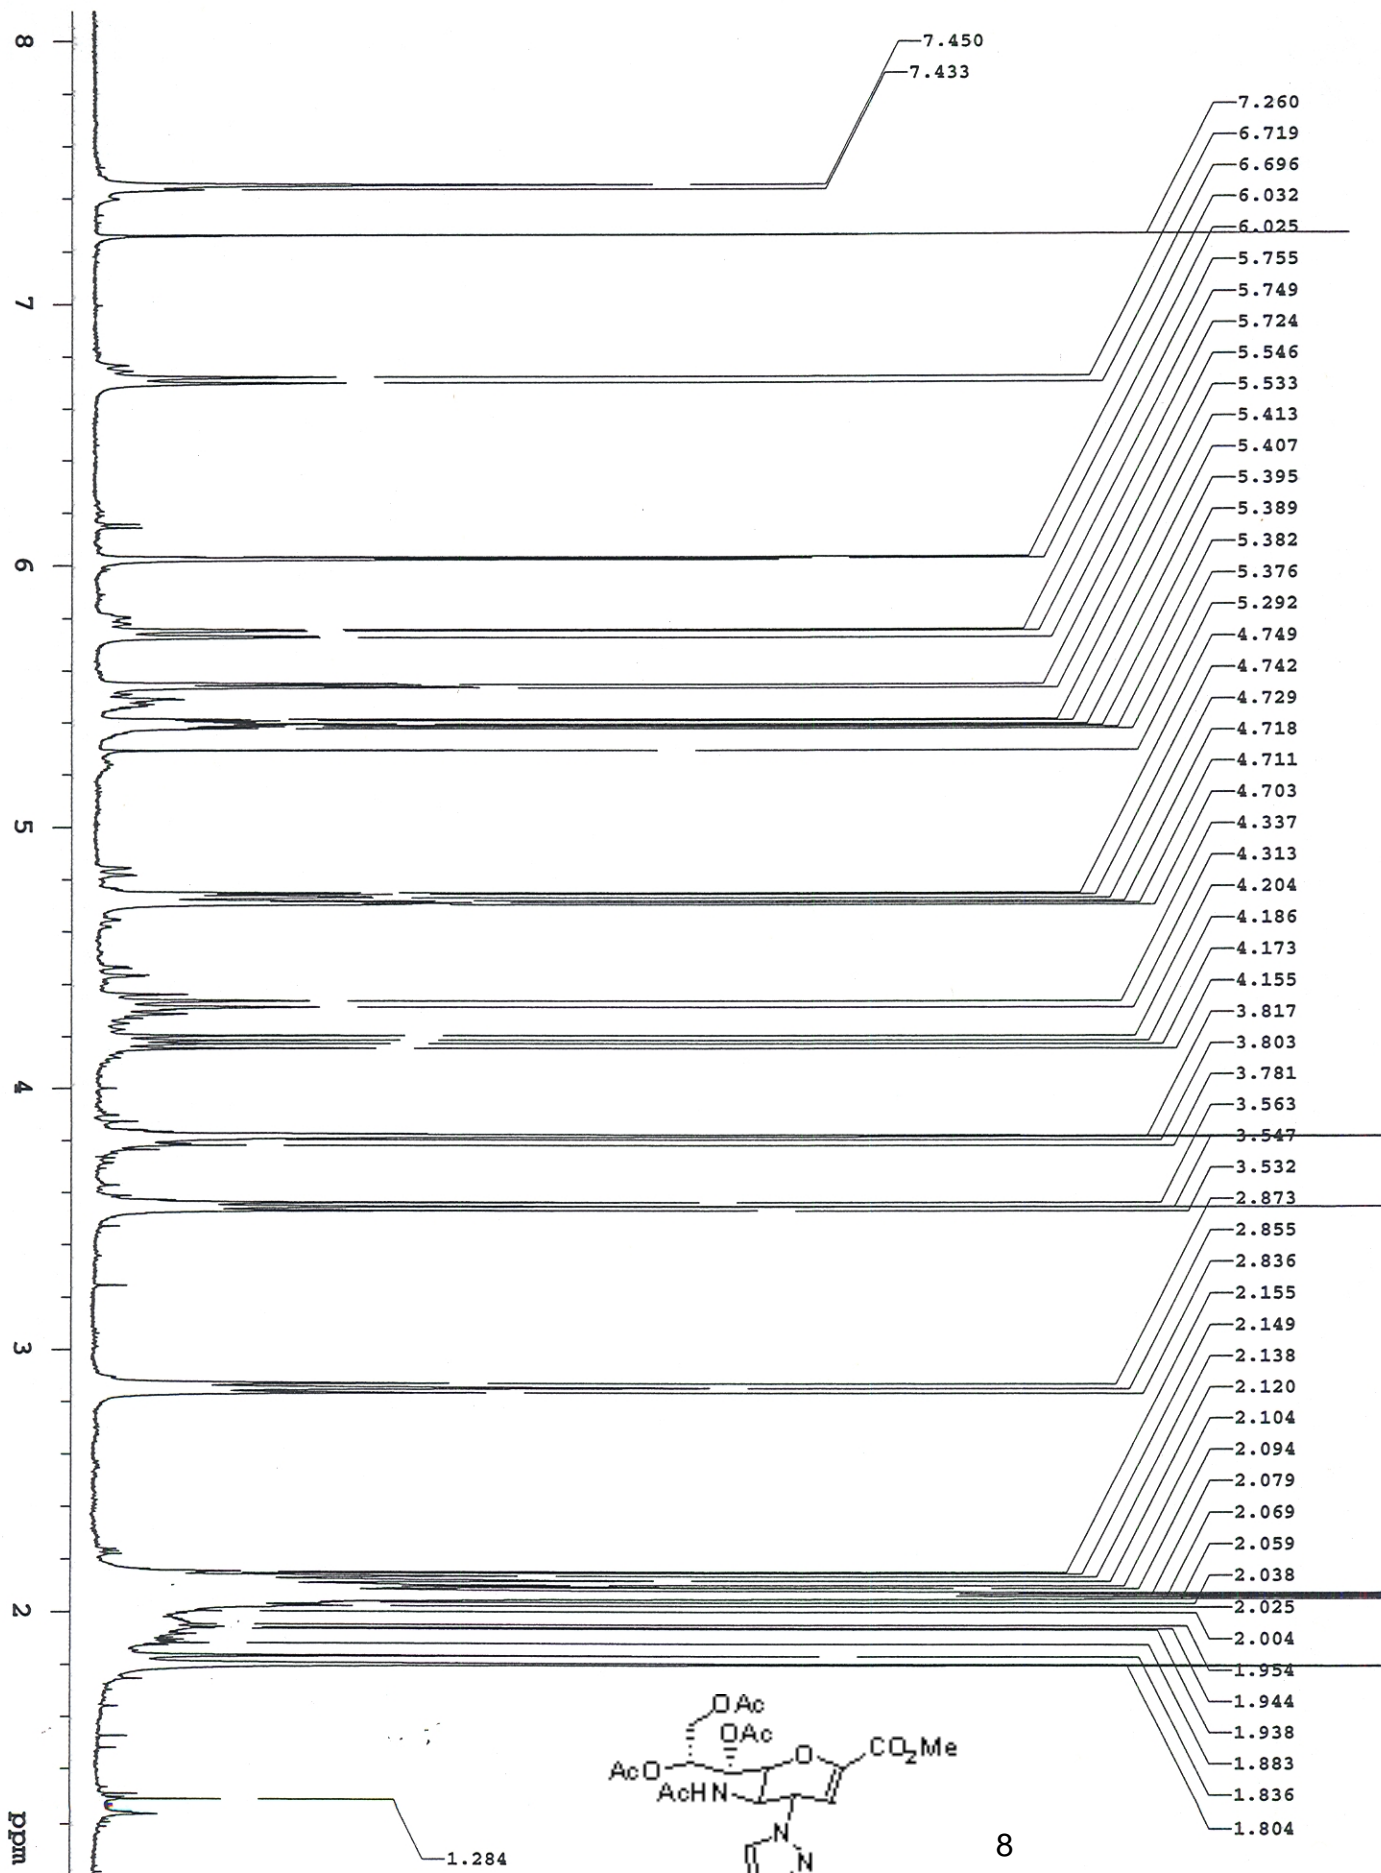

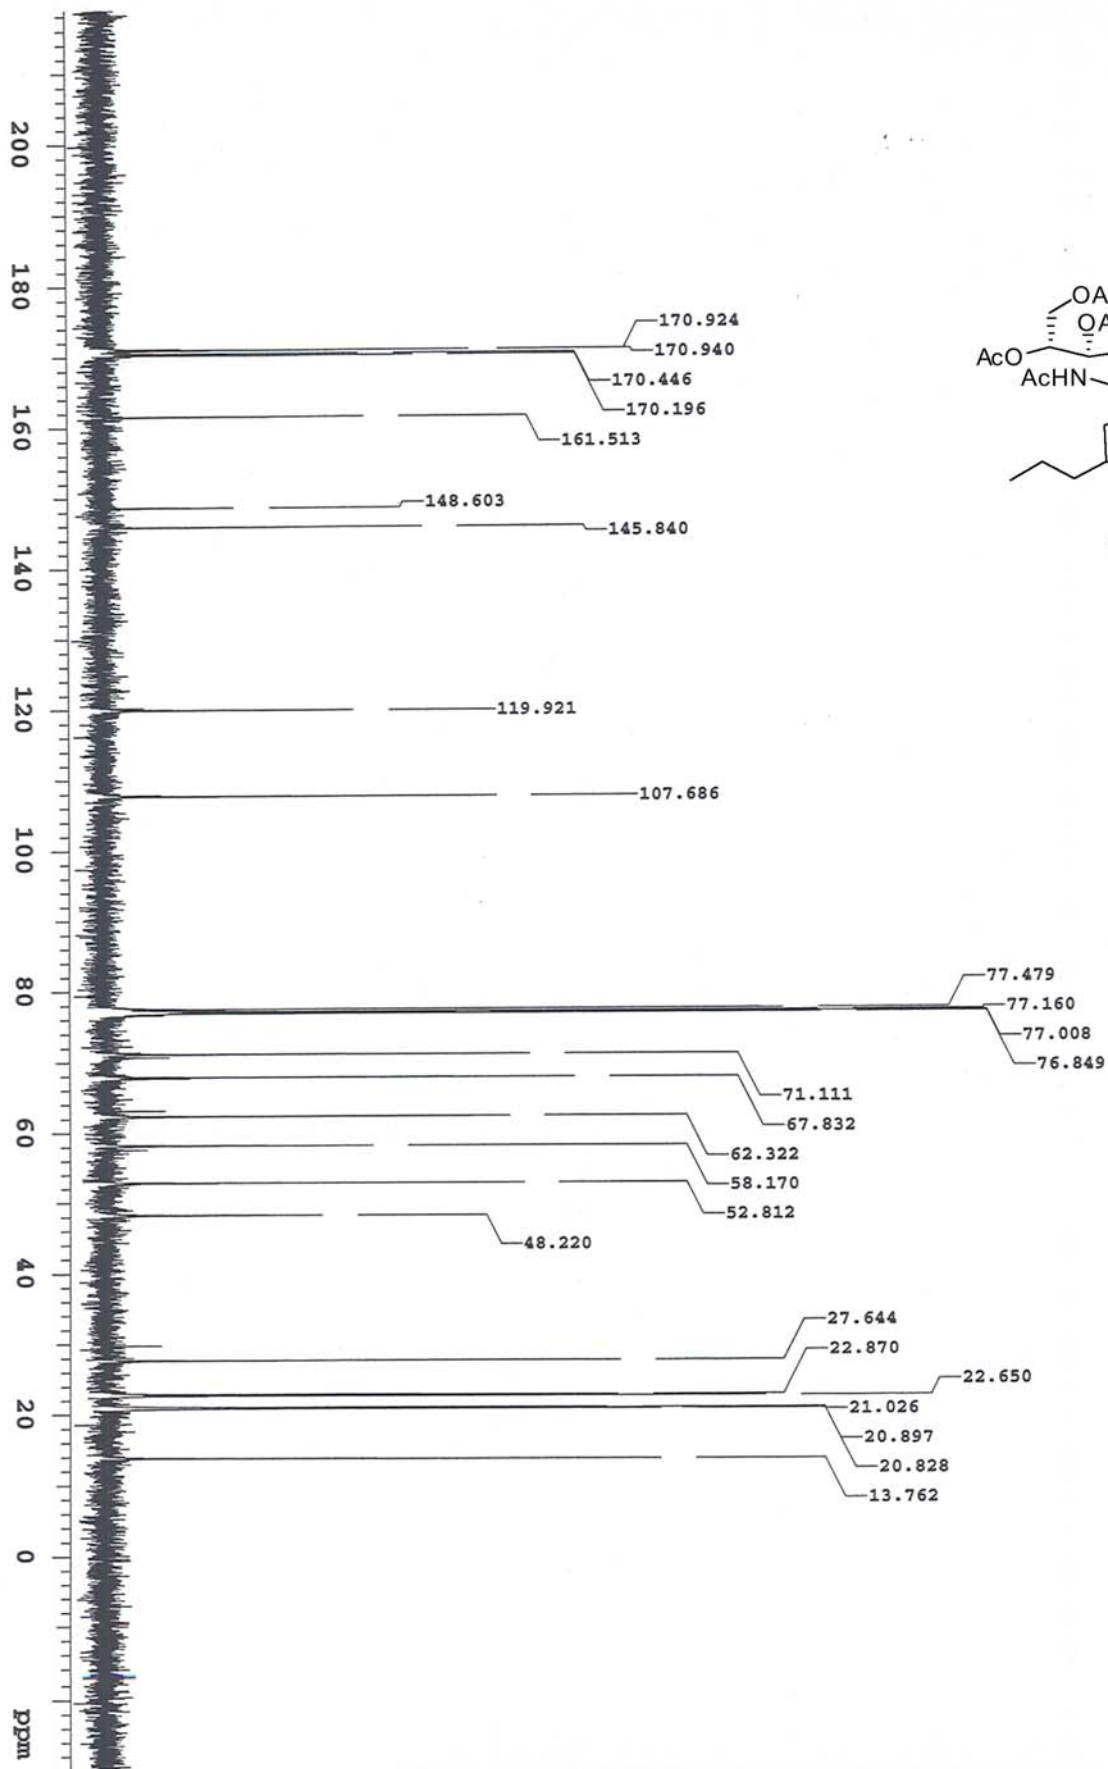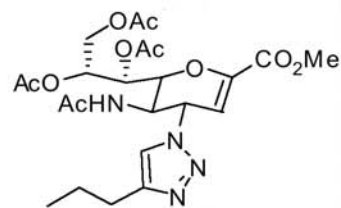

9

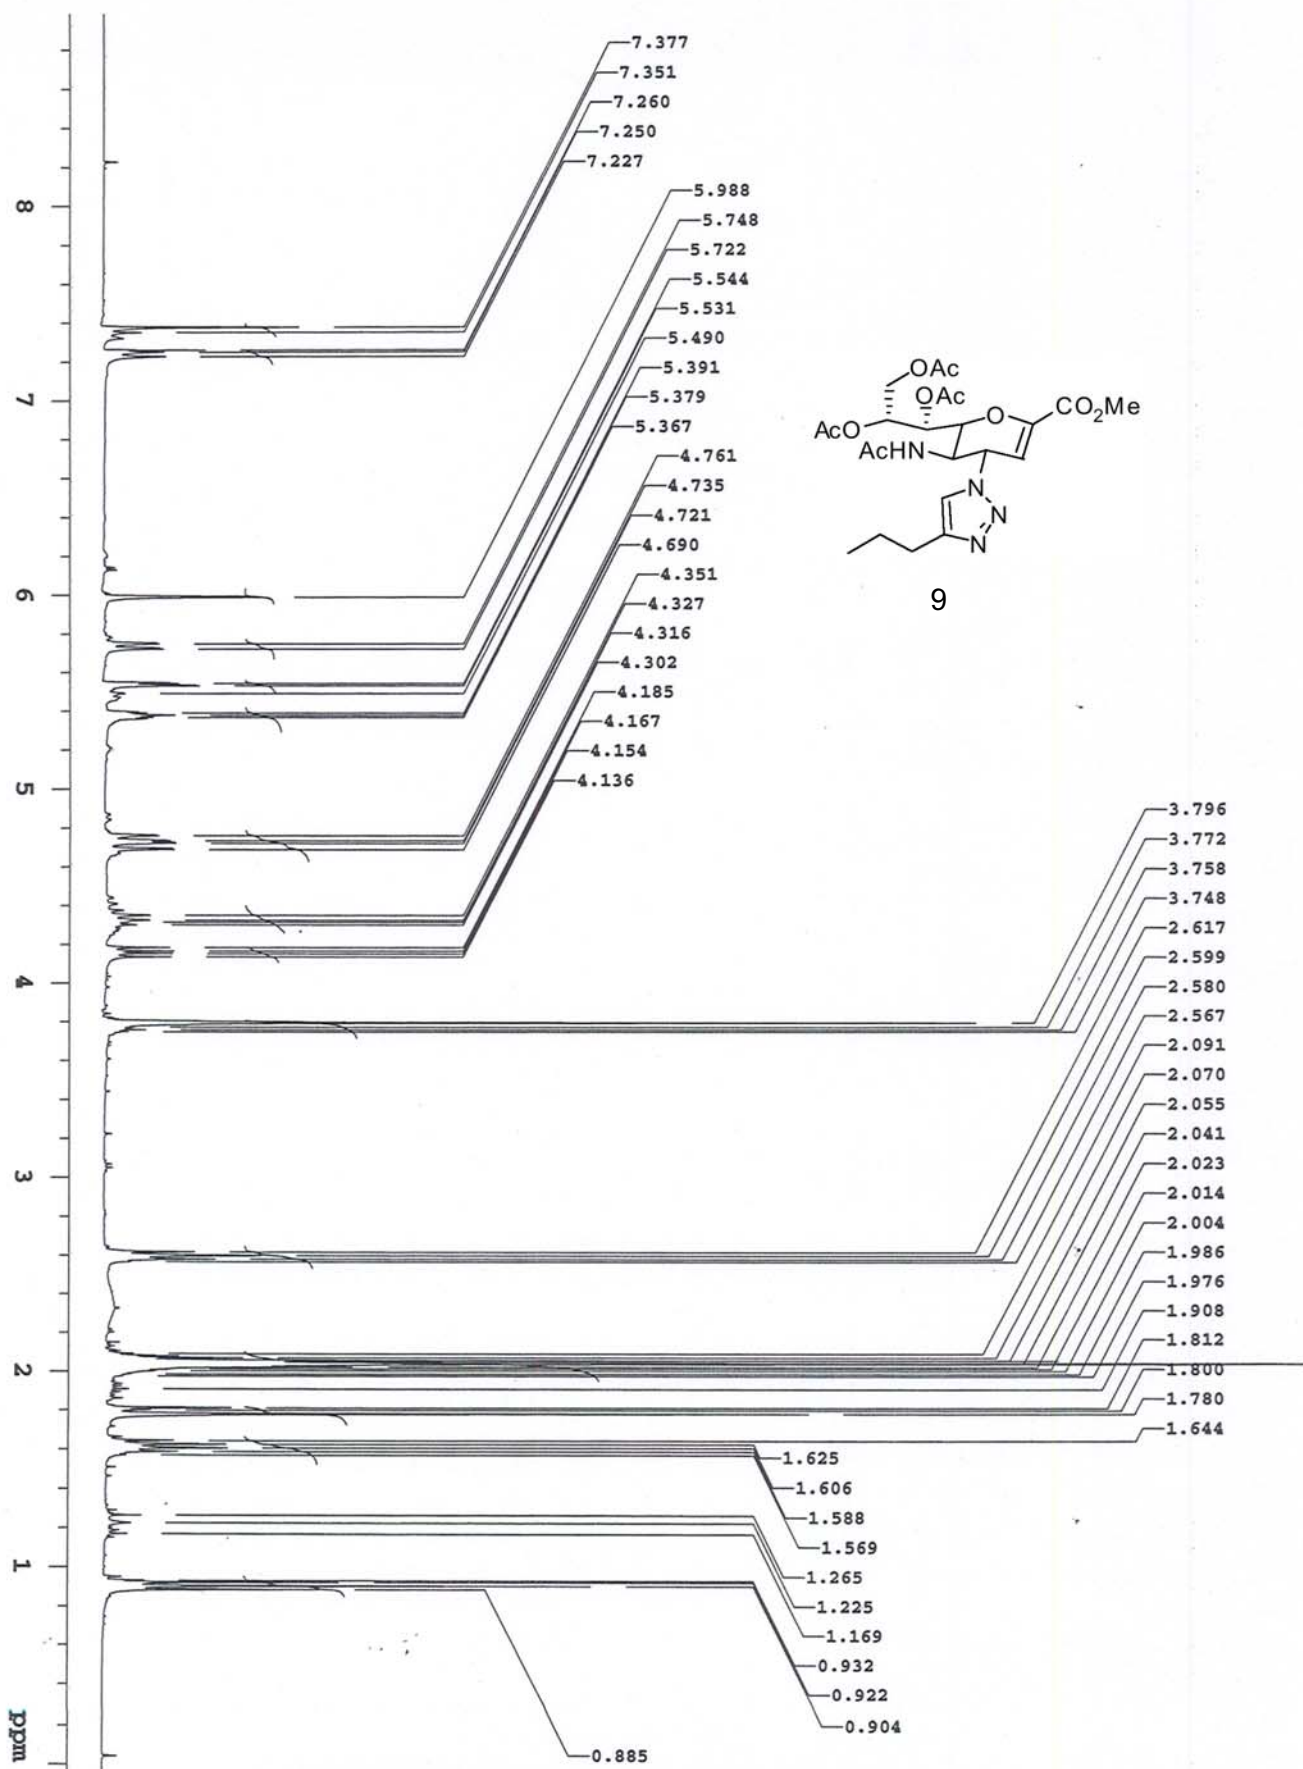

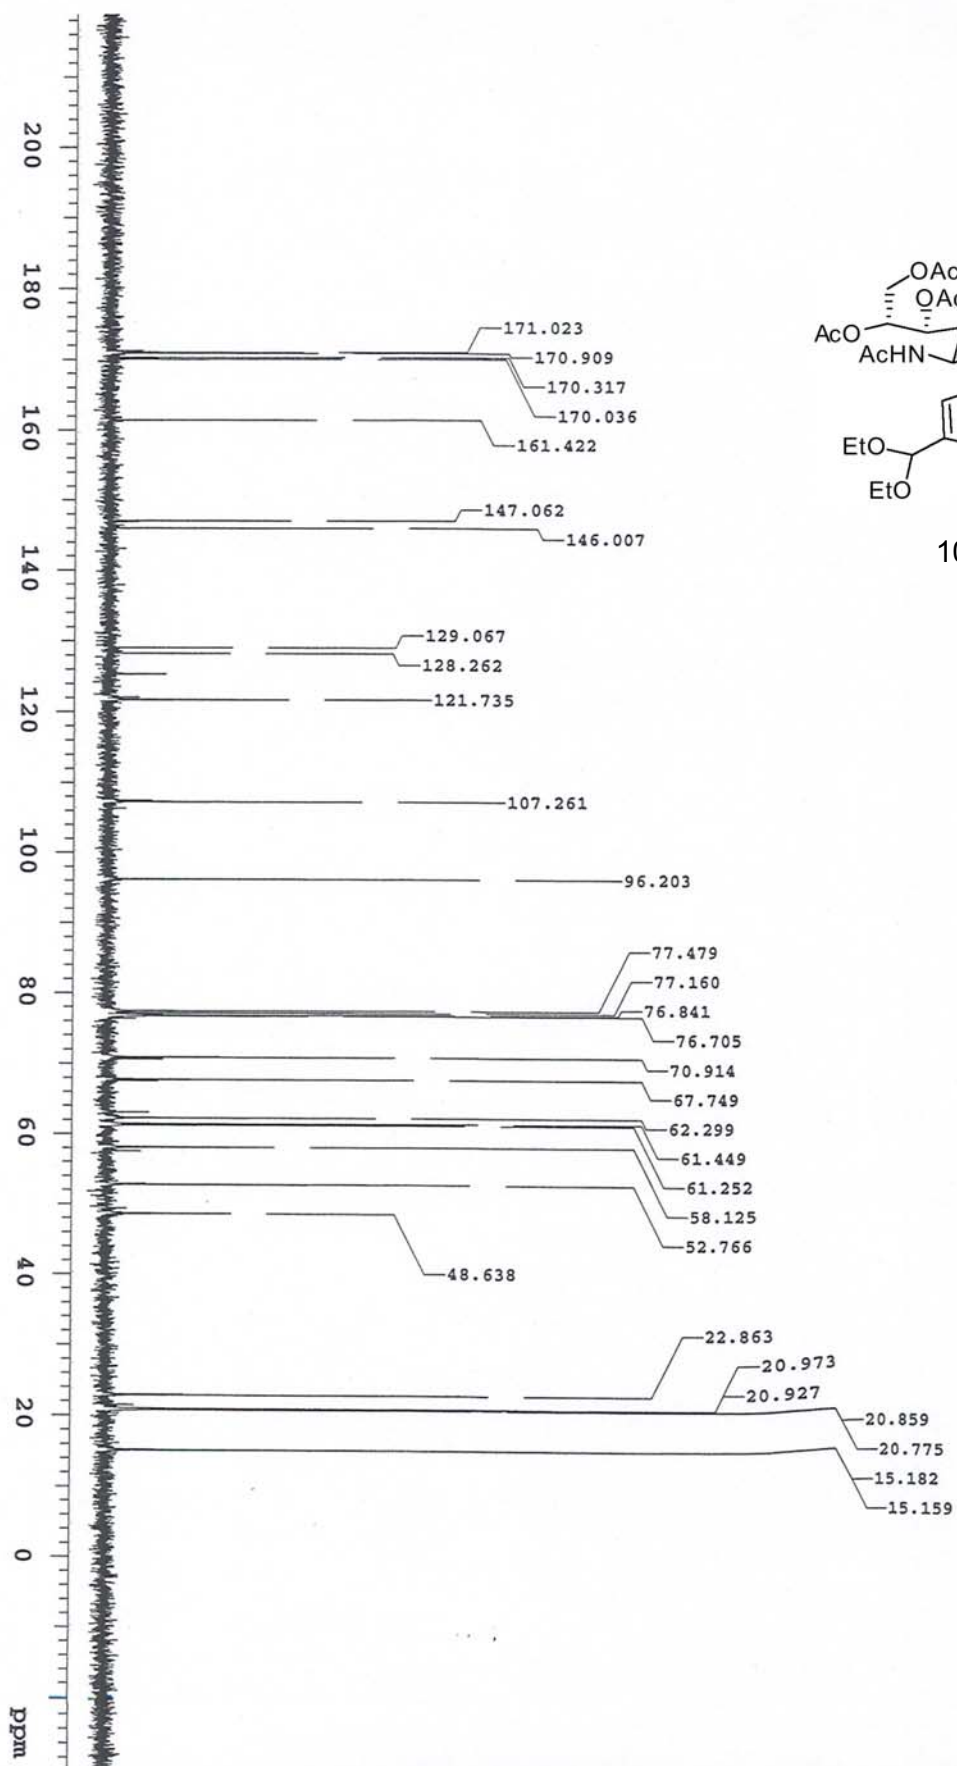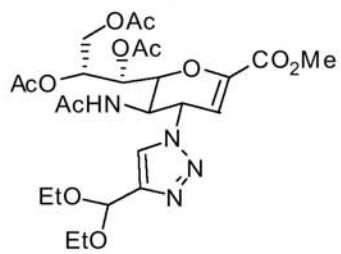

10

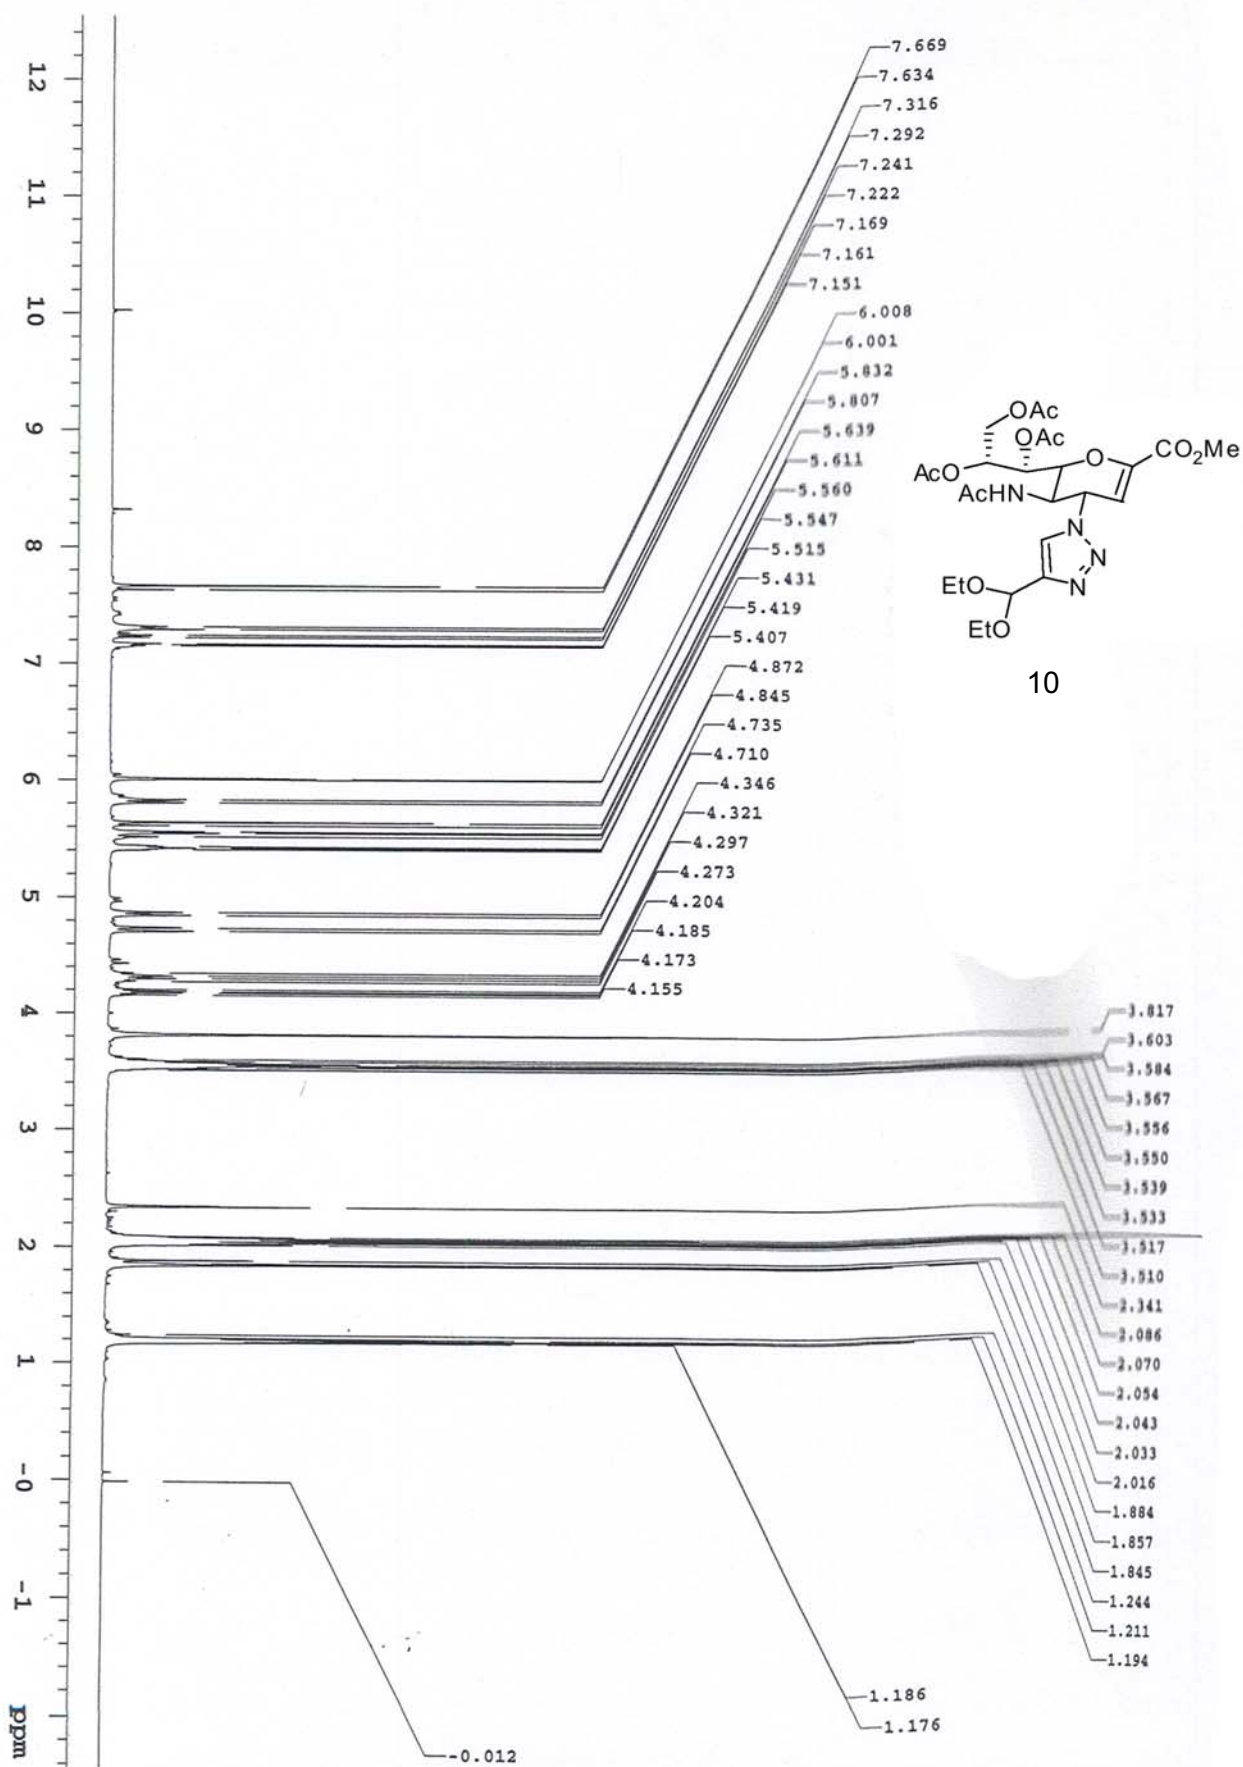



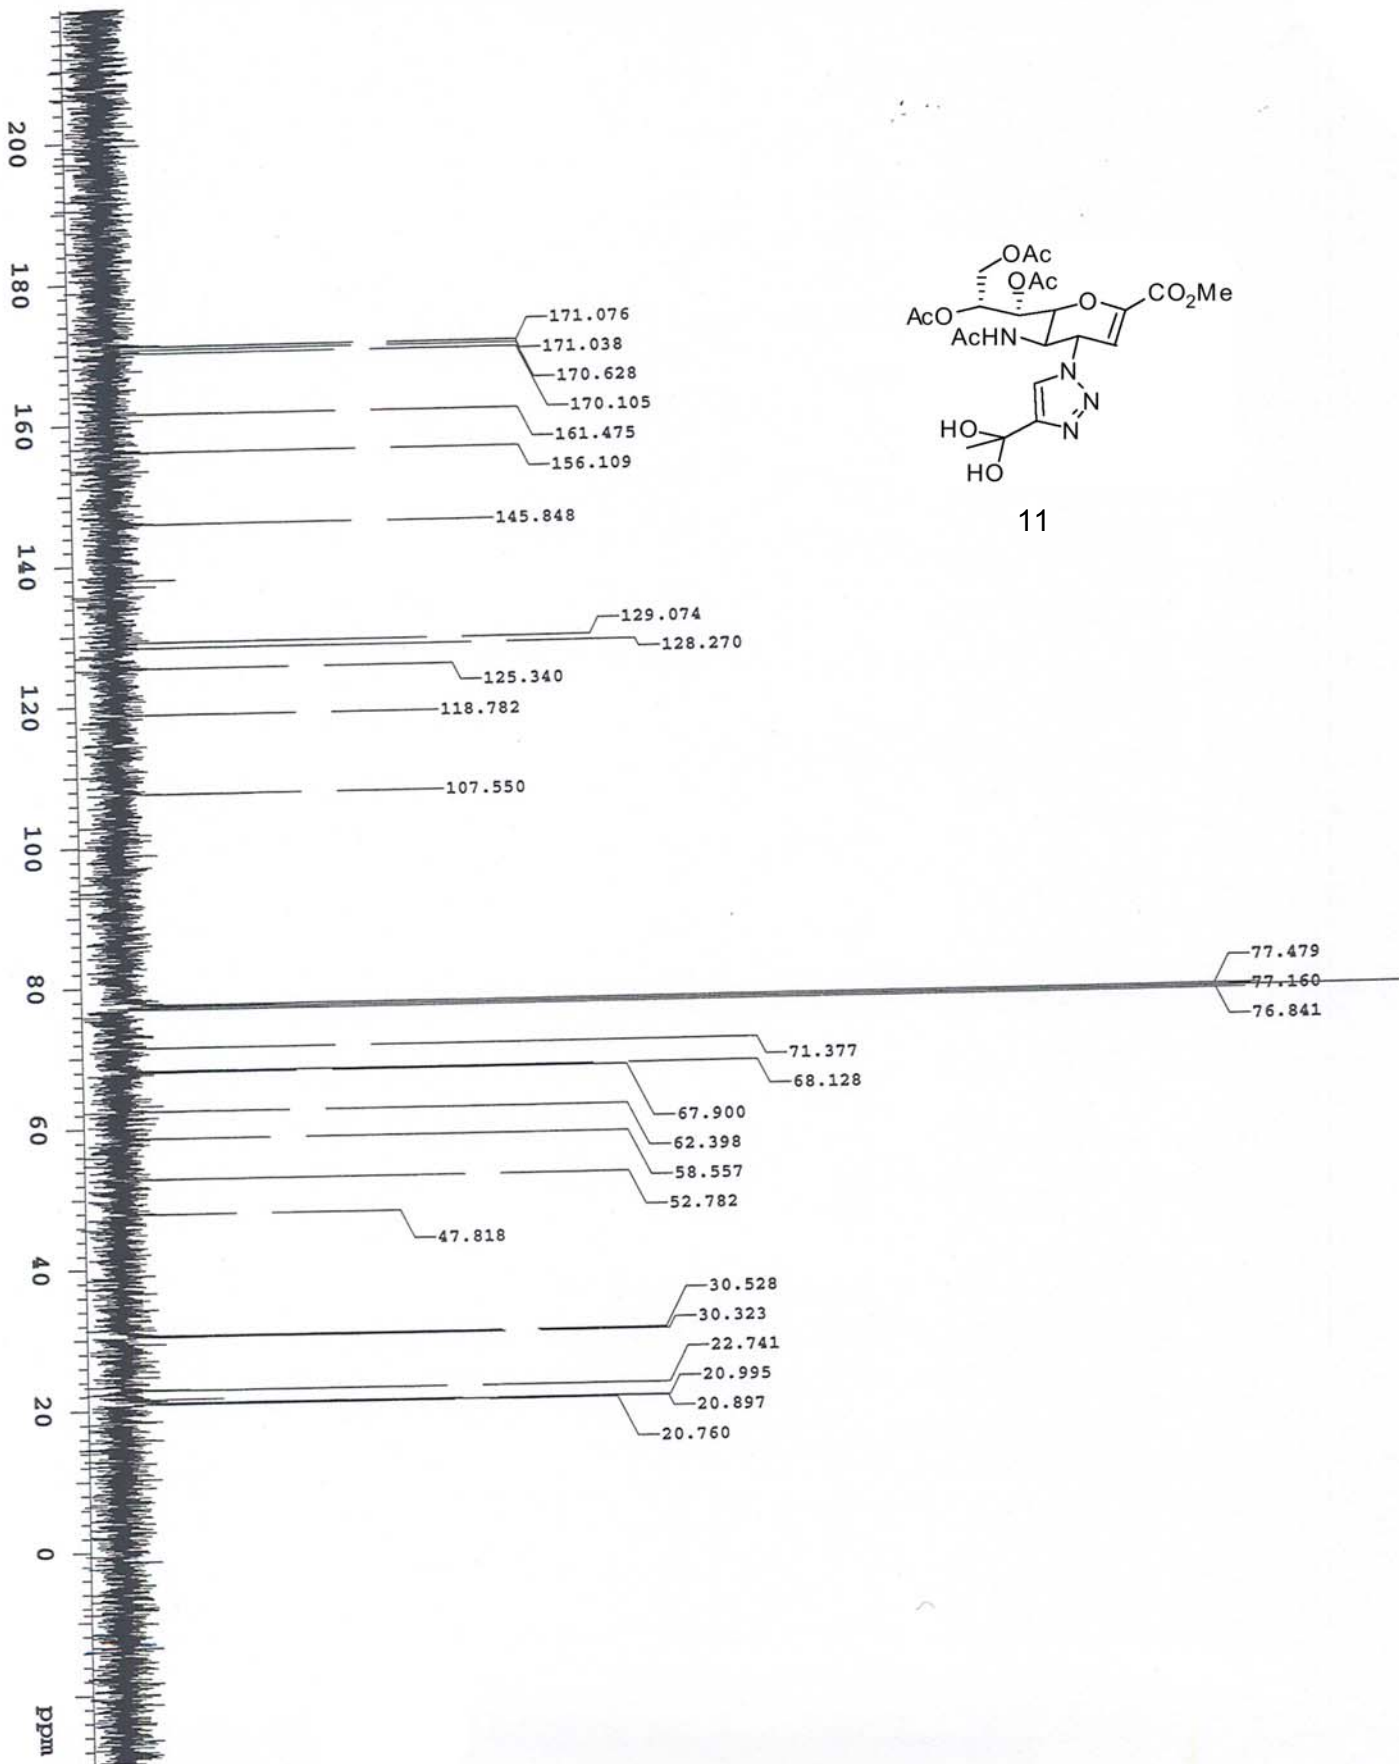

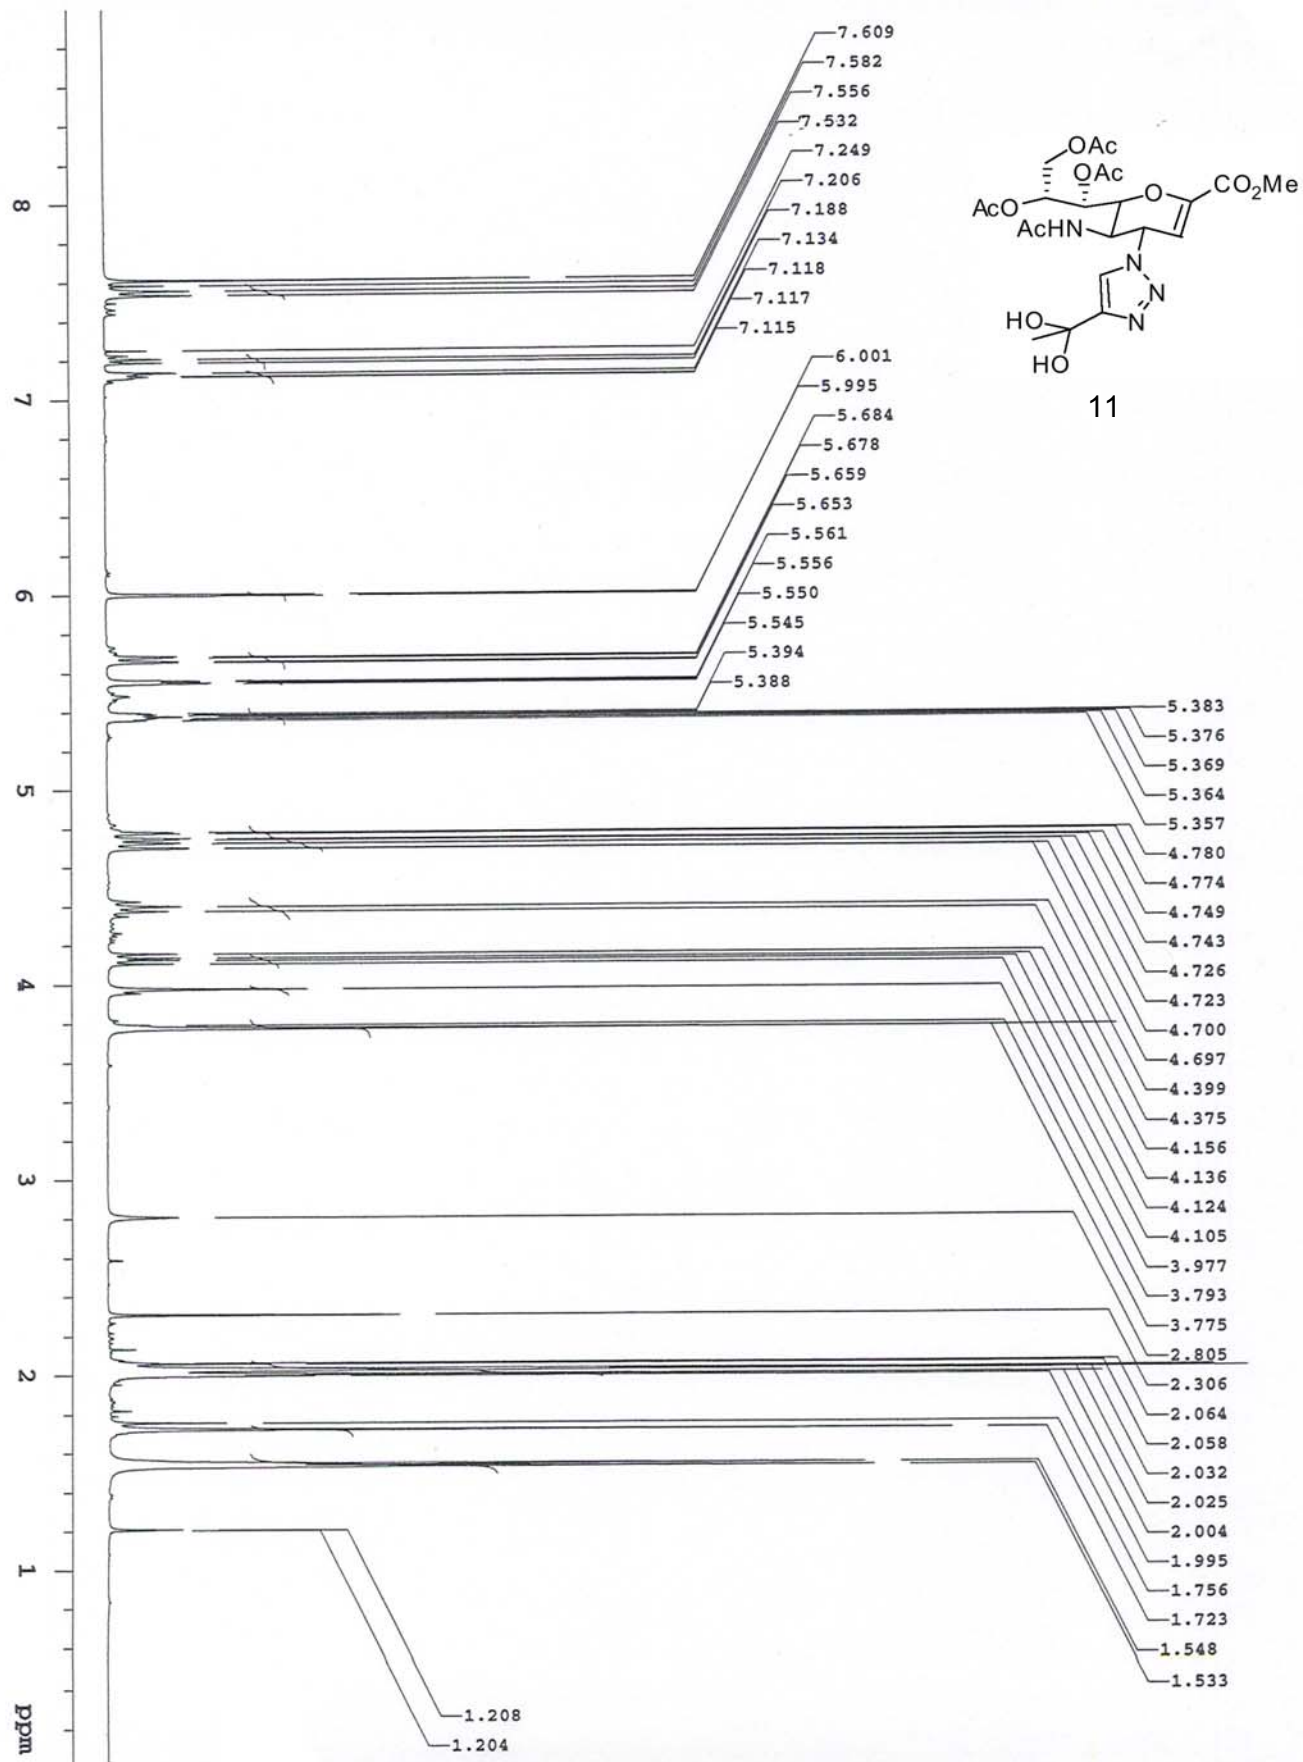

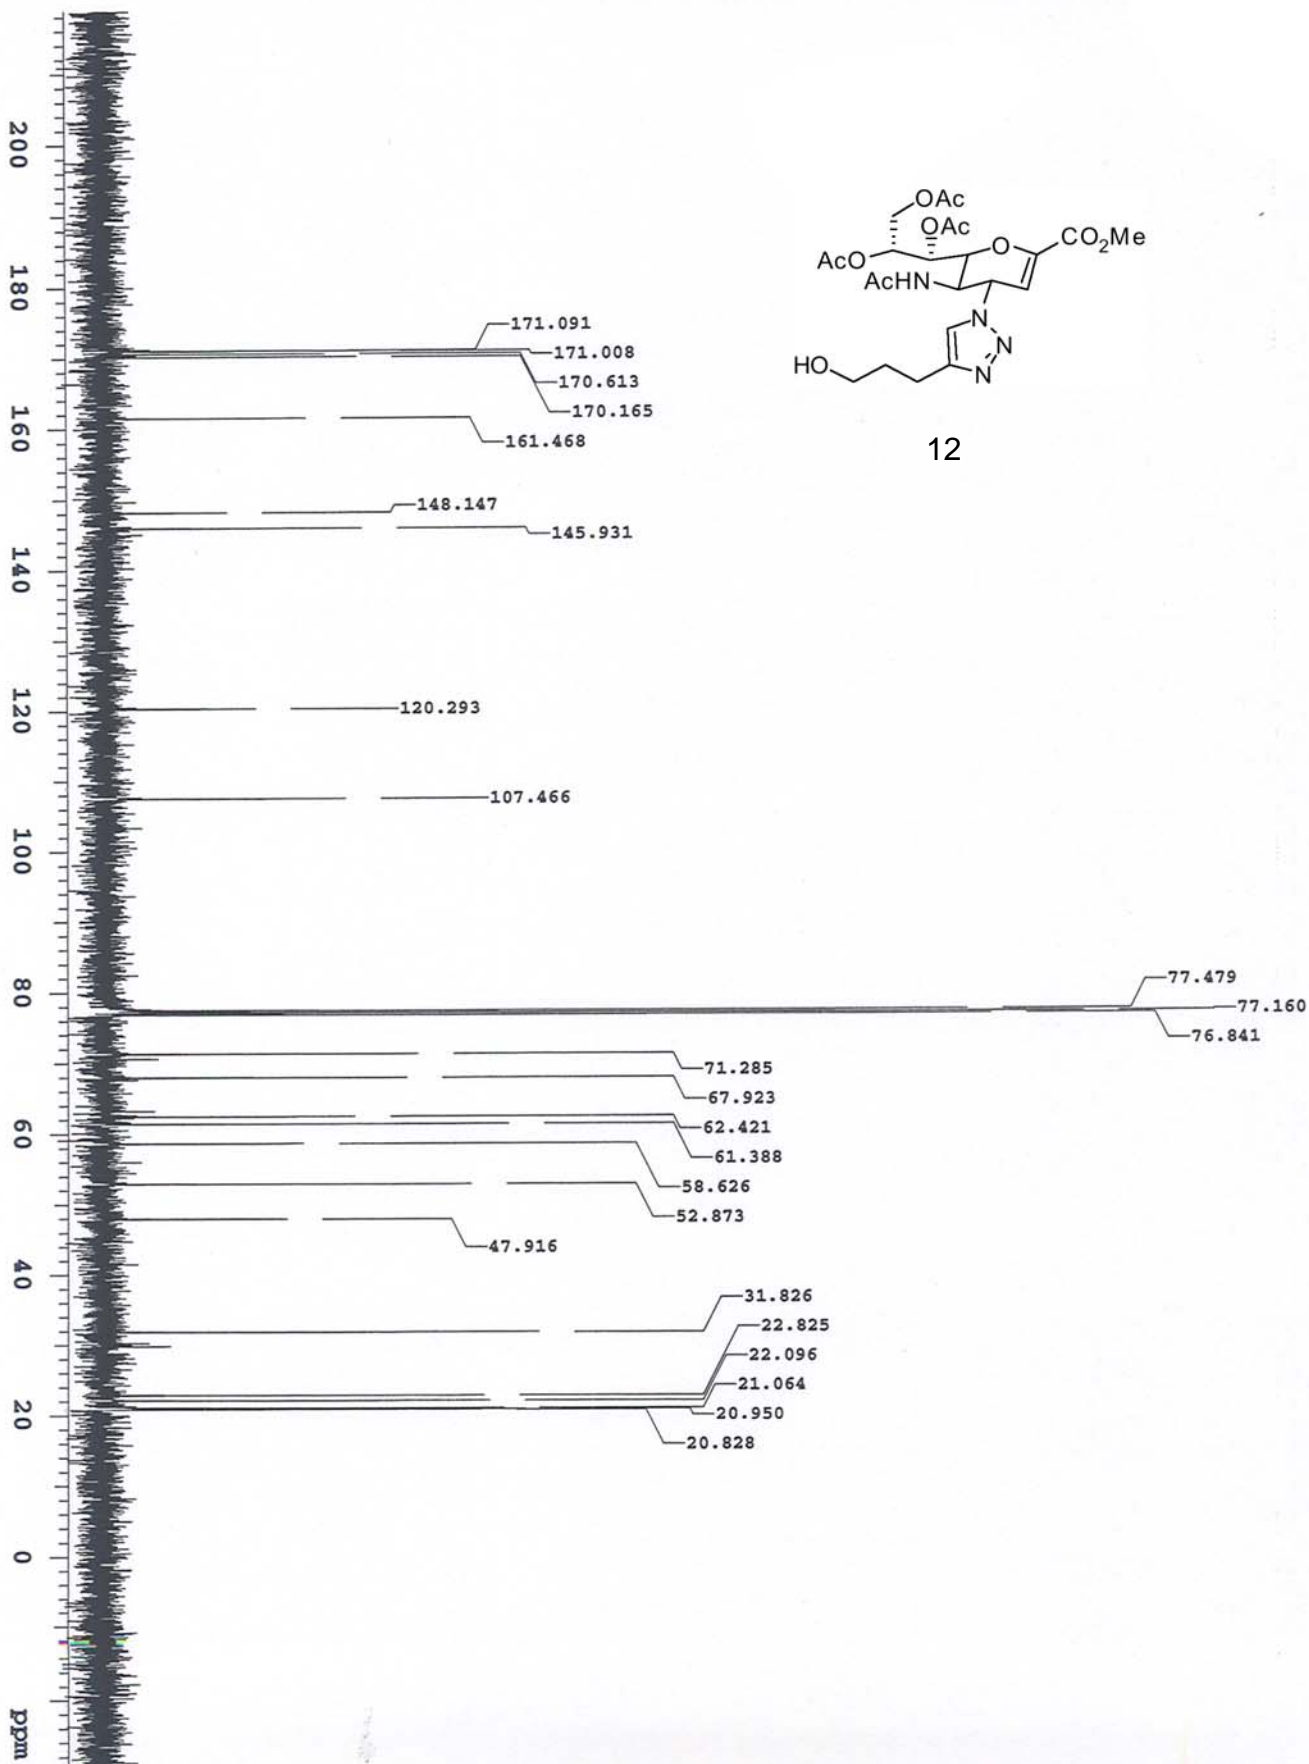

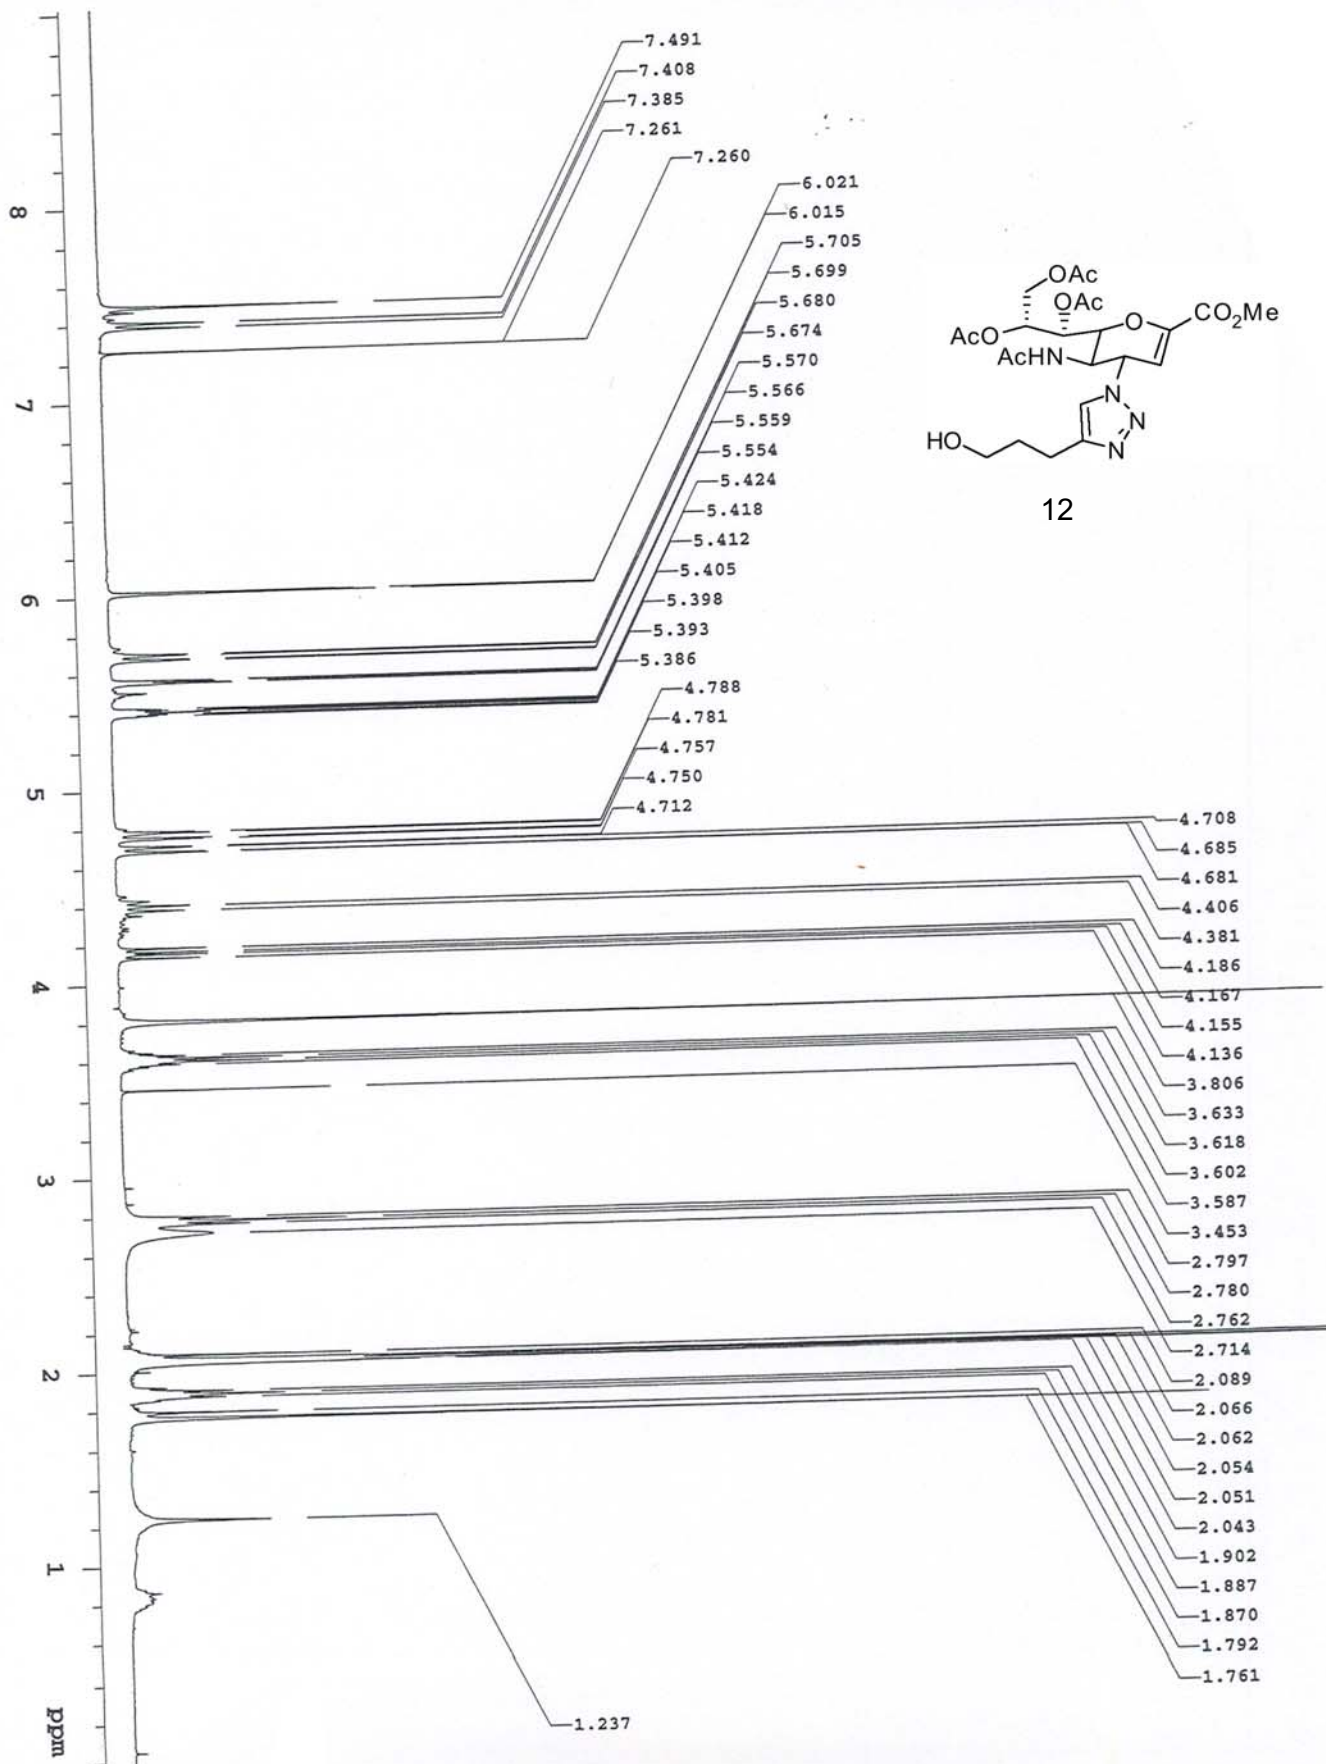

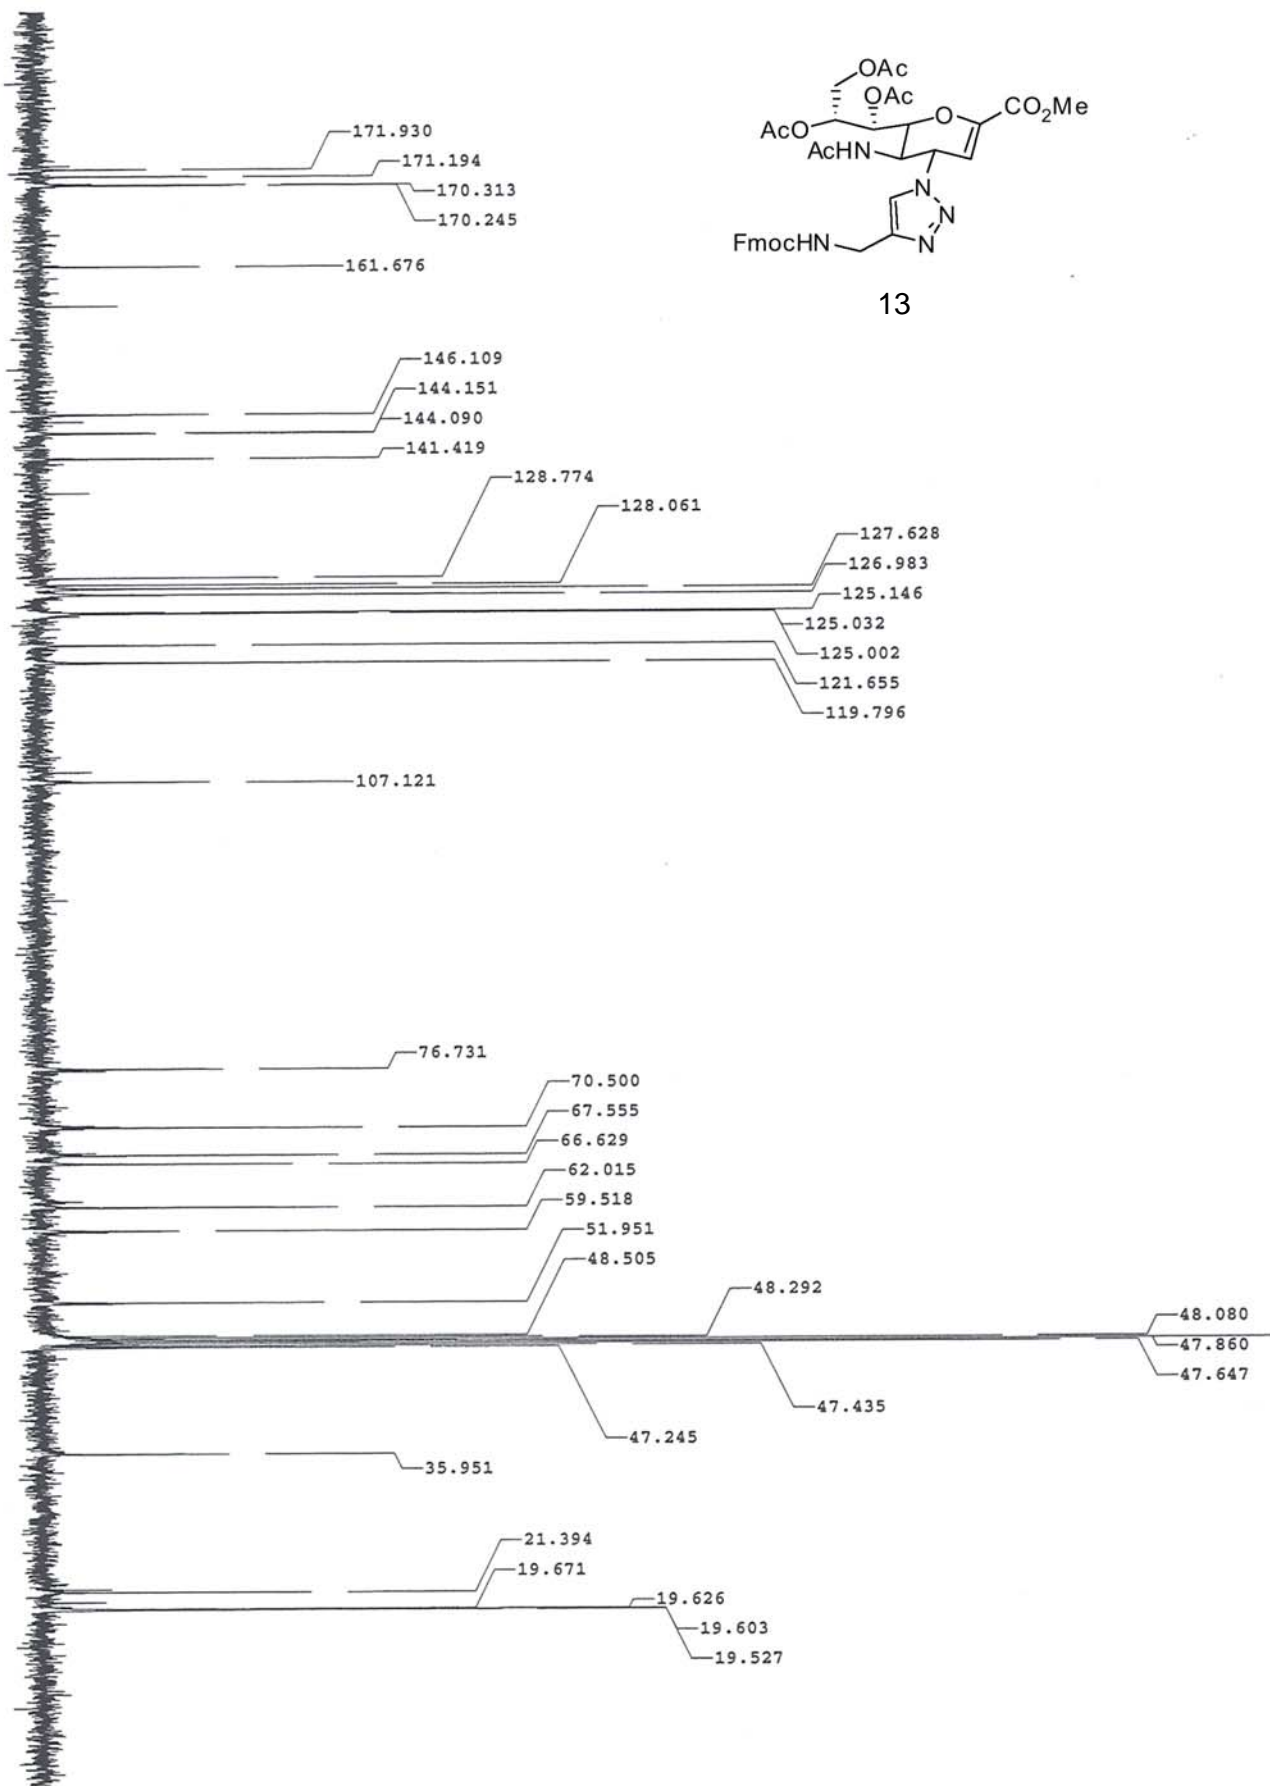

13

Pulse Sequence: s2pul

Solvent: CD3OD

Ambient temperature

INOVA-400 "nmr400"

Pulse 45.7 degrees

Acq. time 3.744 sec

Width 6000.6 Hz

16 repetitions

OBSERVE H1, 399.7691485 MHz

DATA PROCESSING

FW size 65536

Total time 1 min, 0 sec

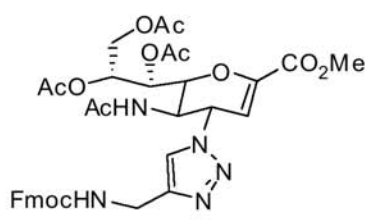

13

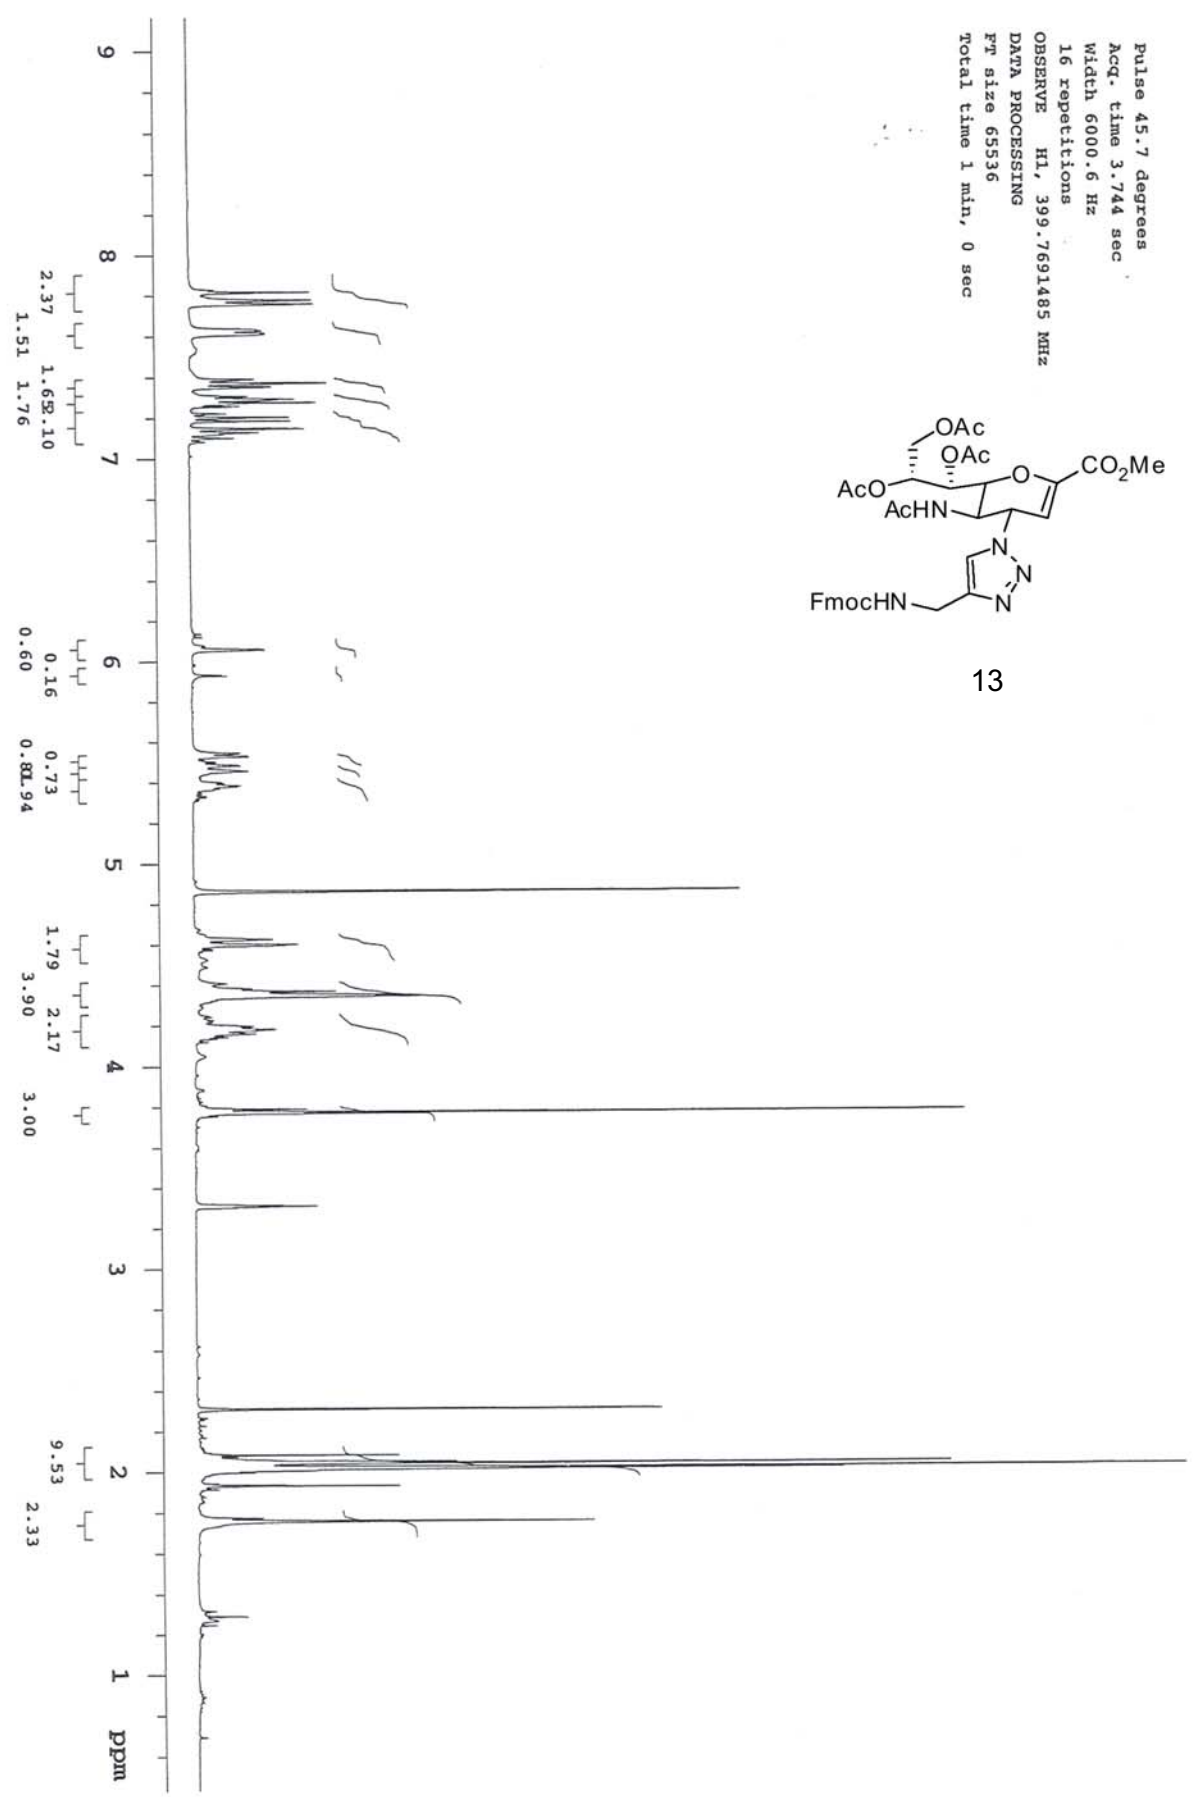

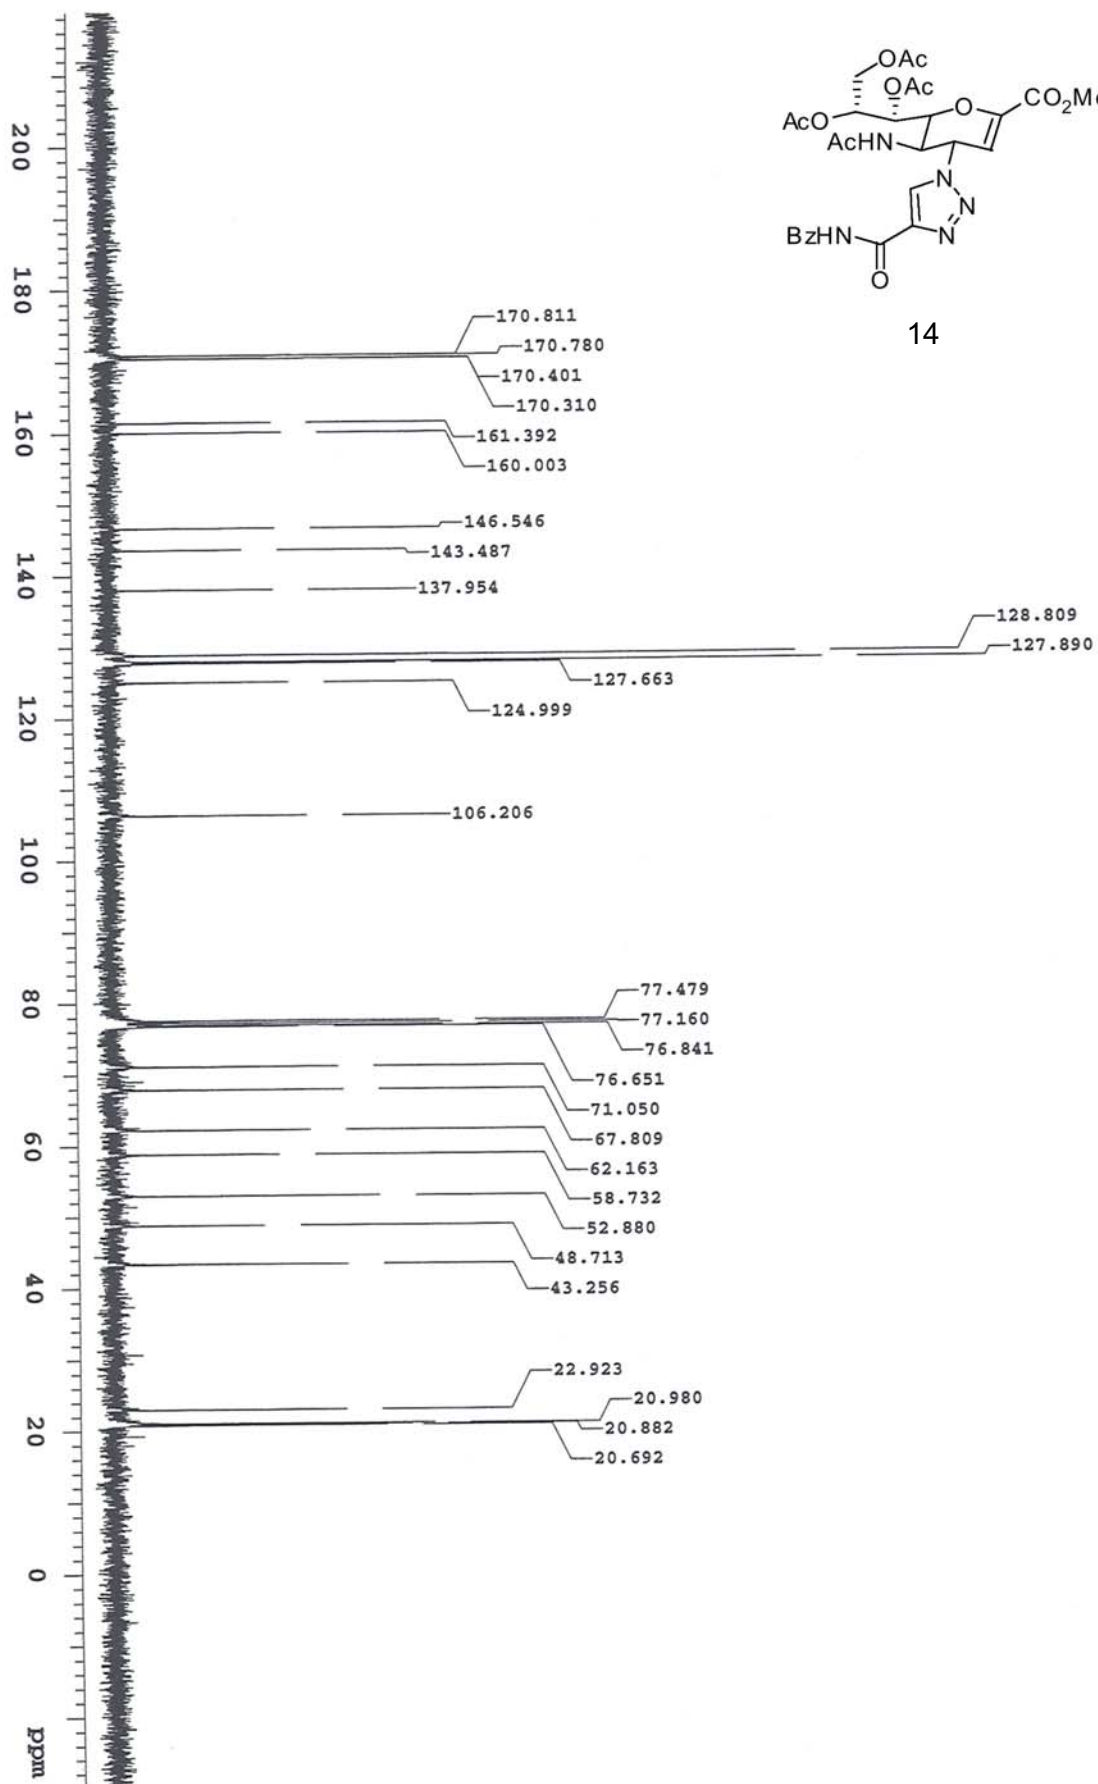

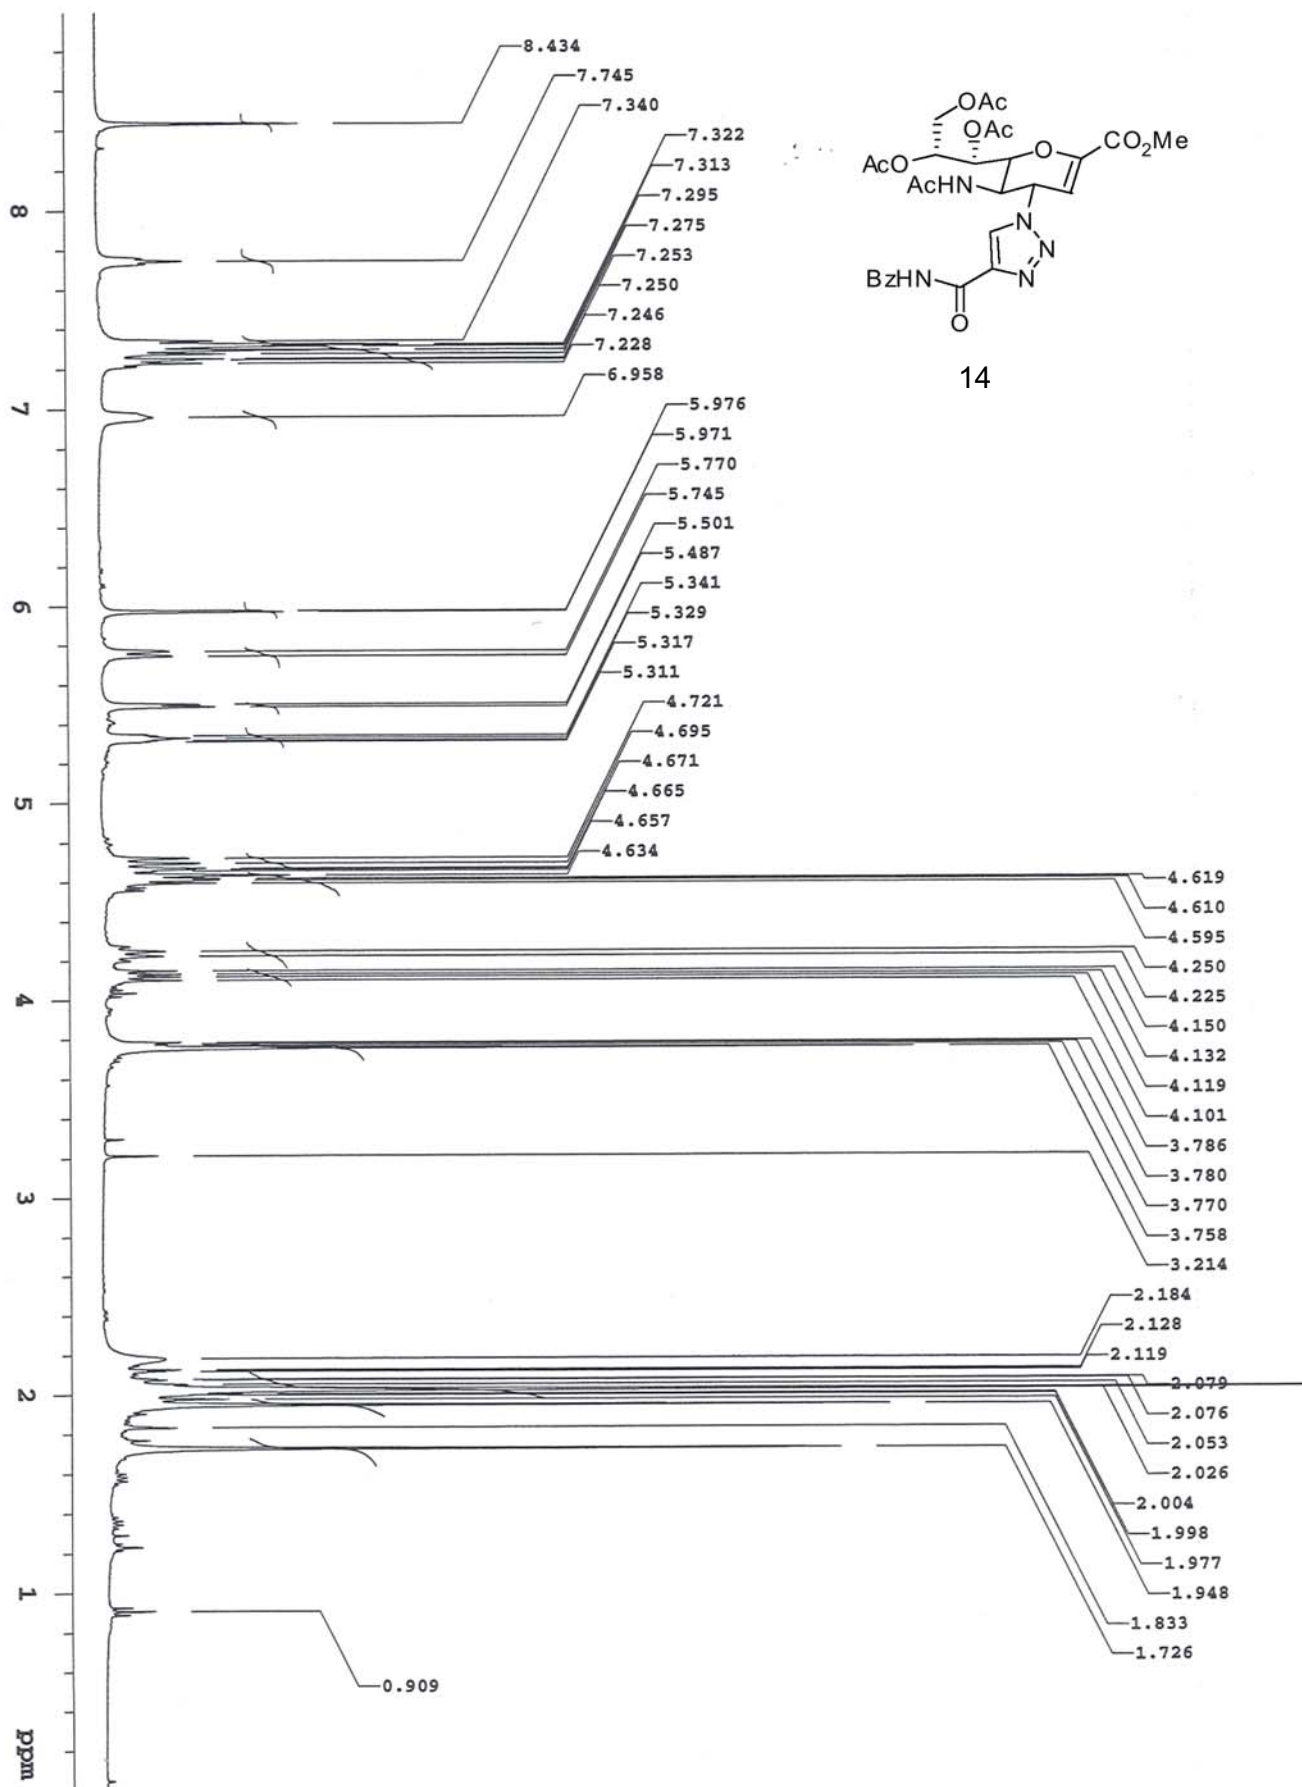



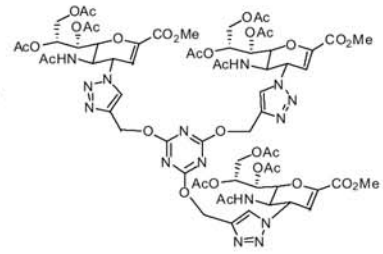

15

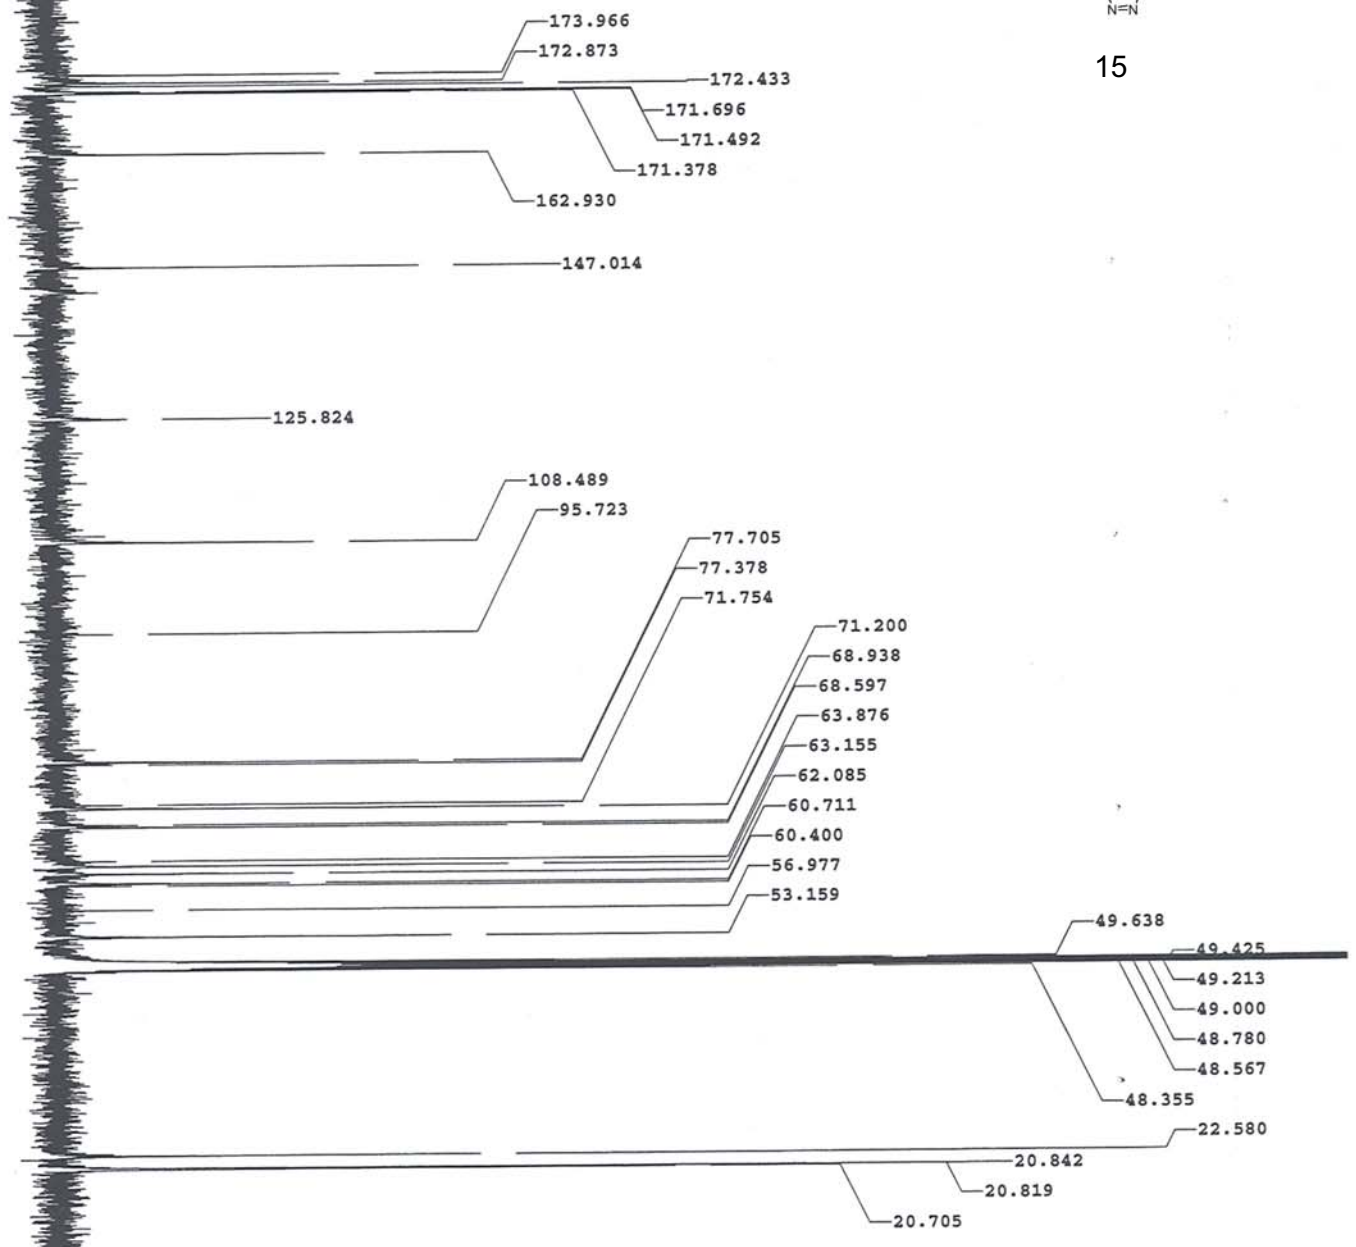

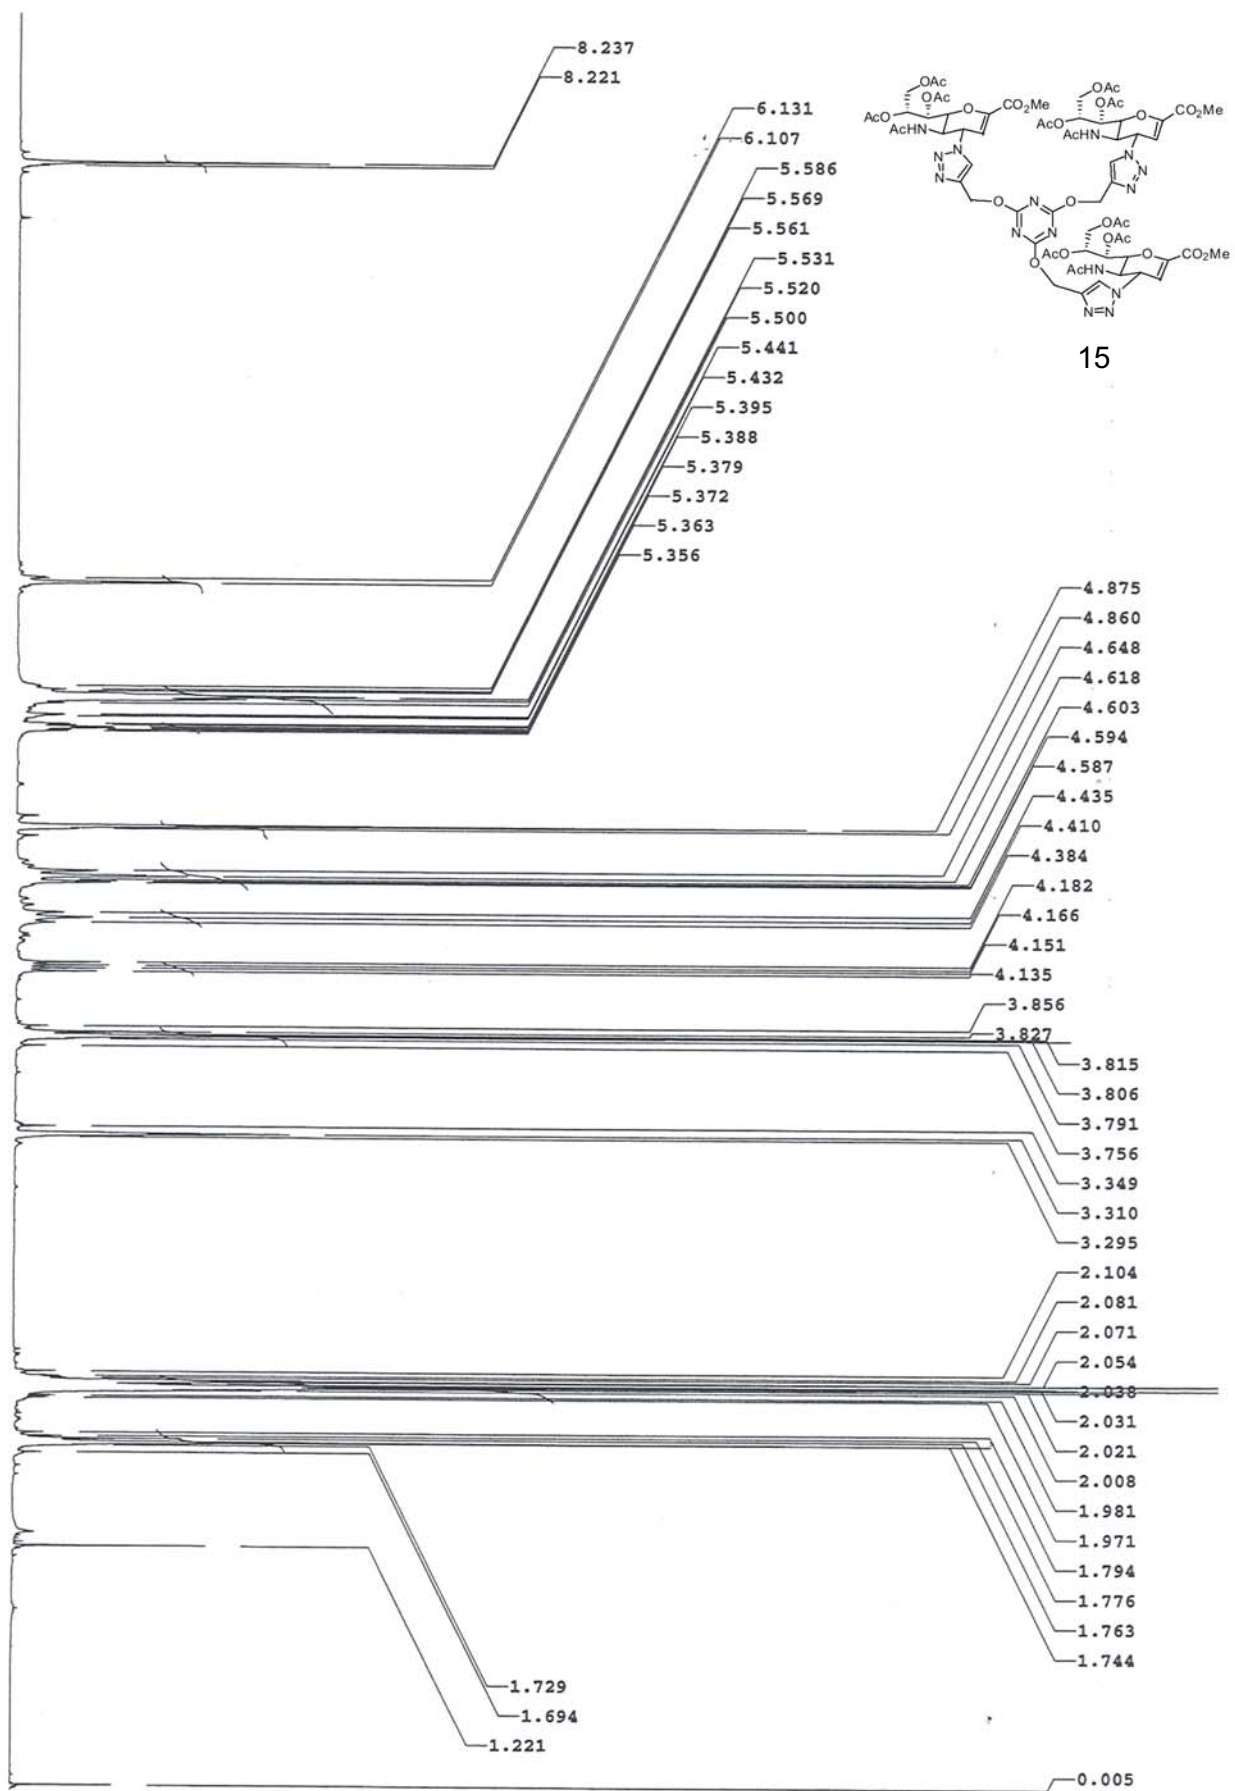

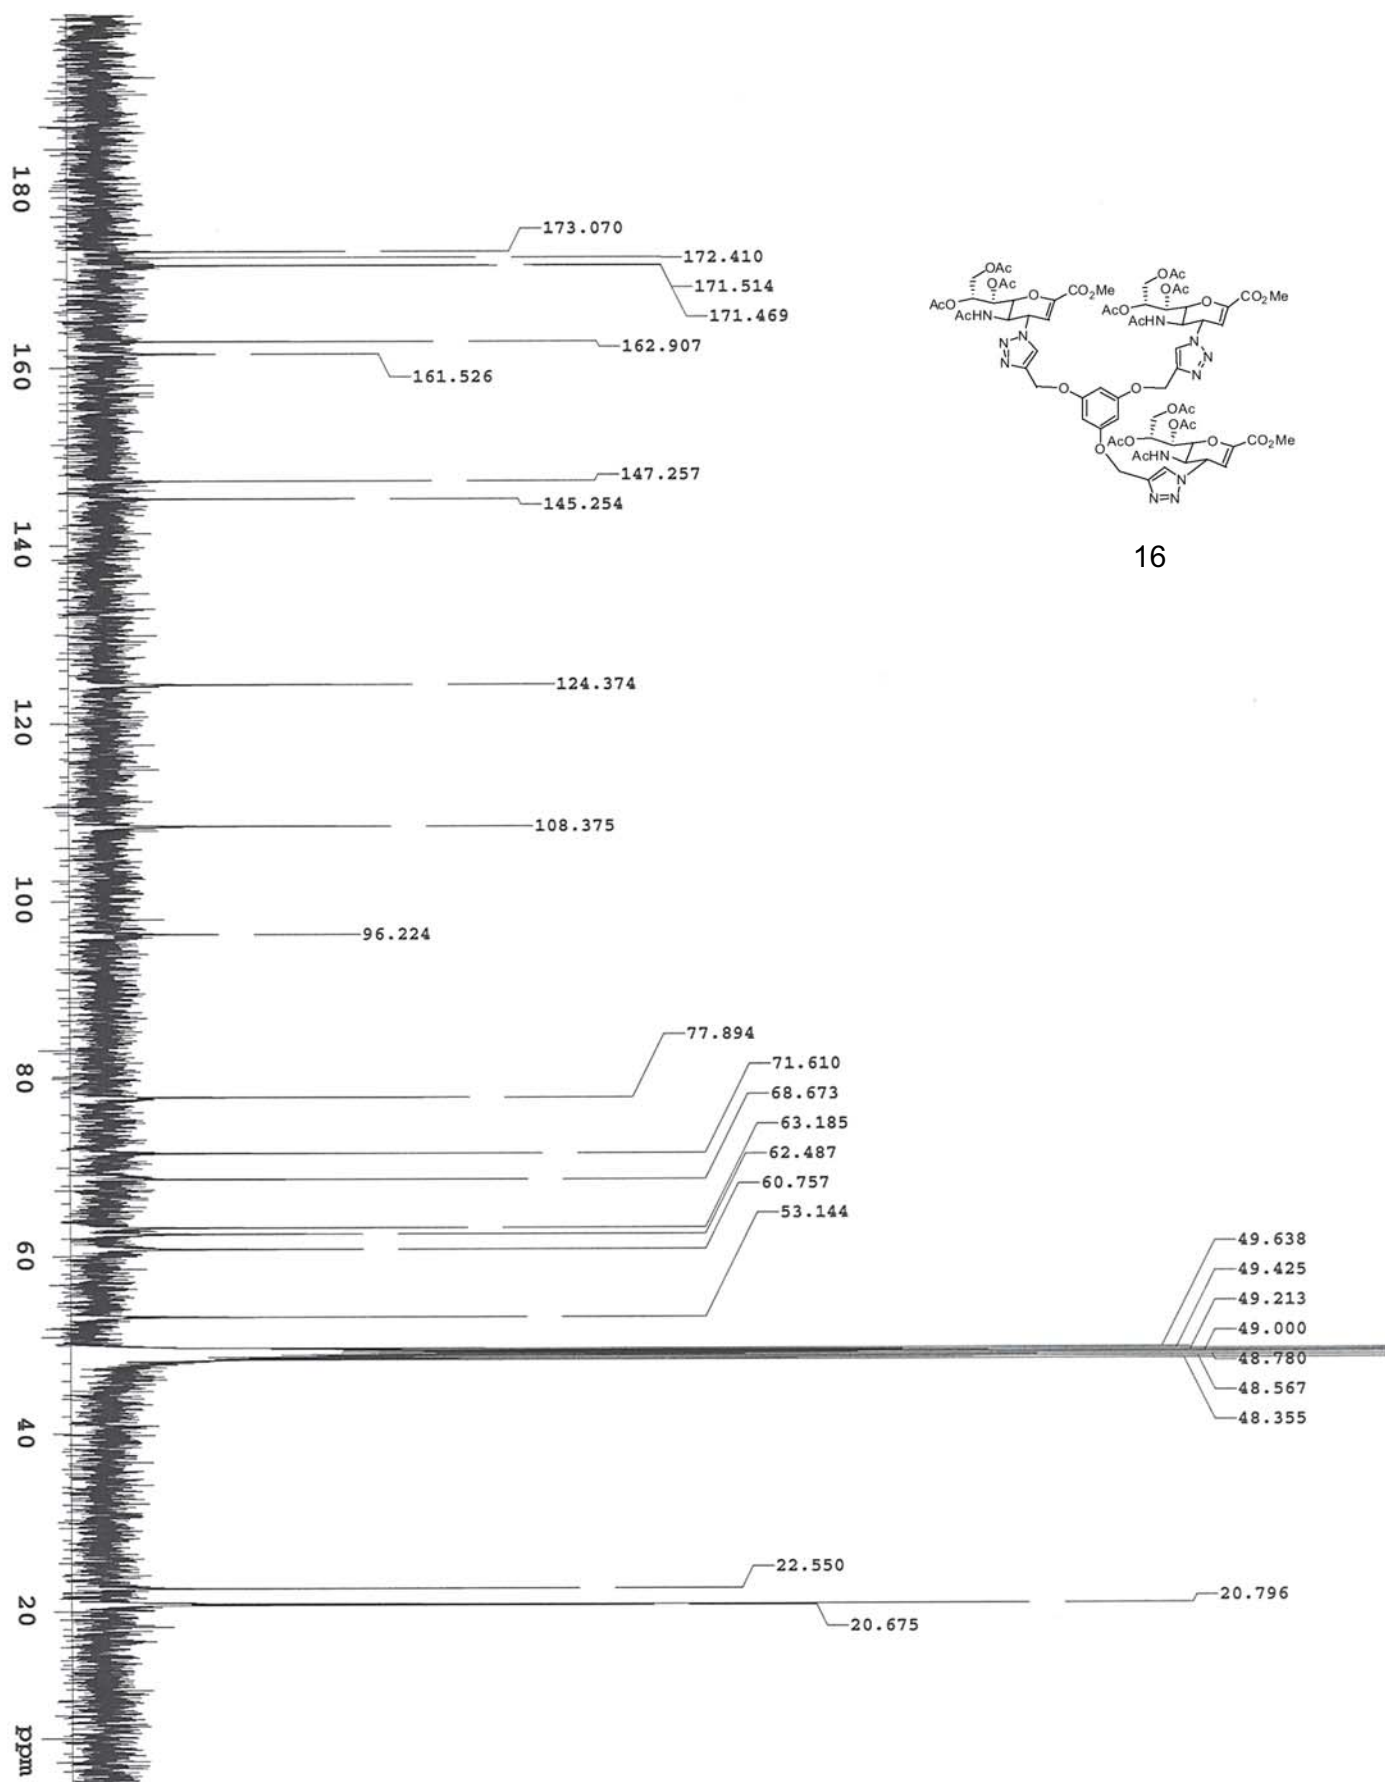

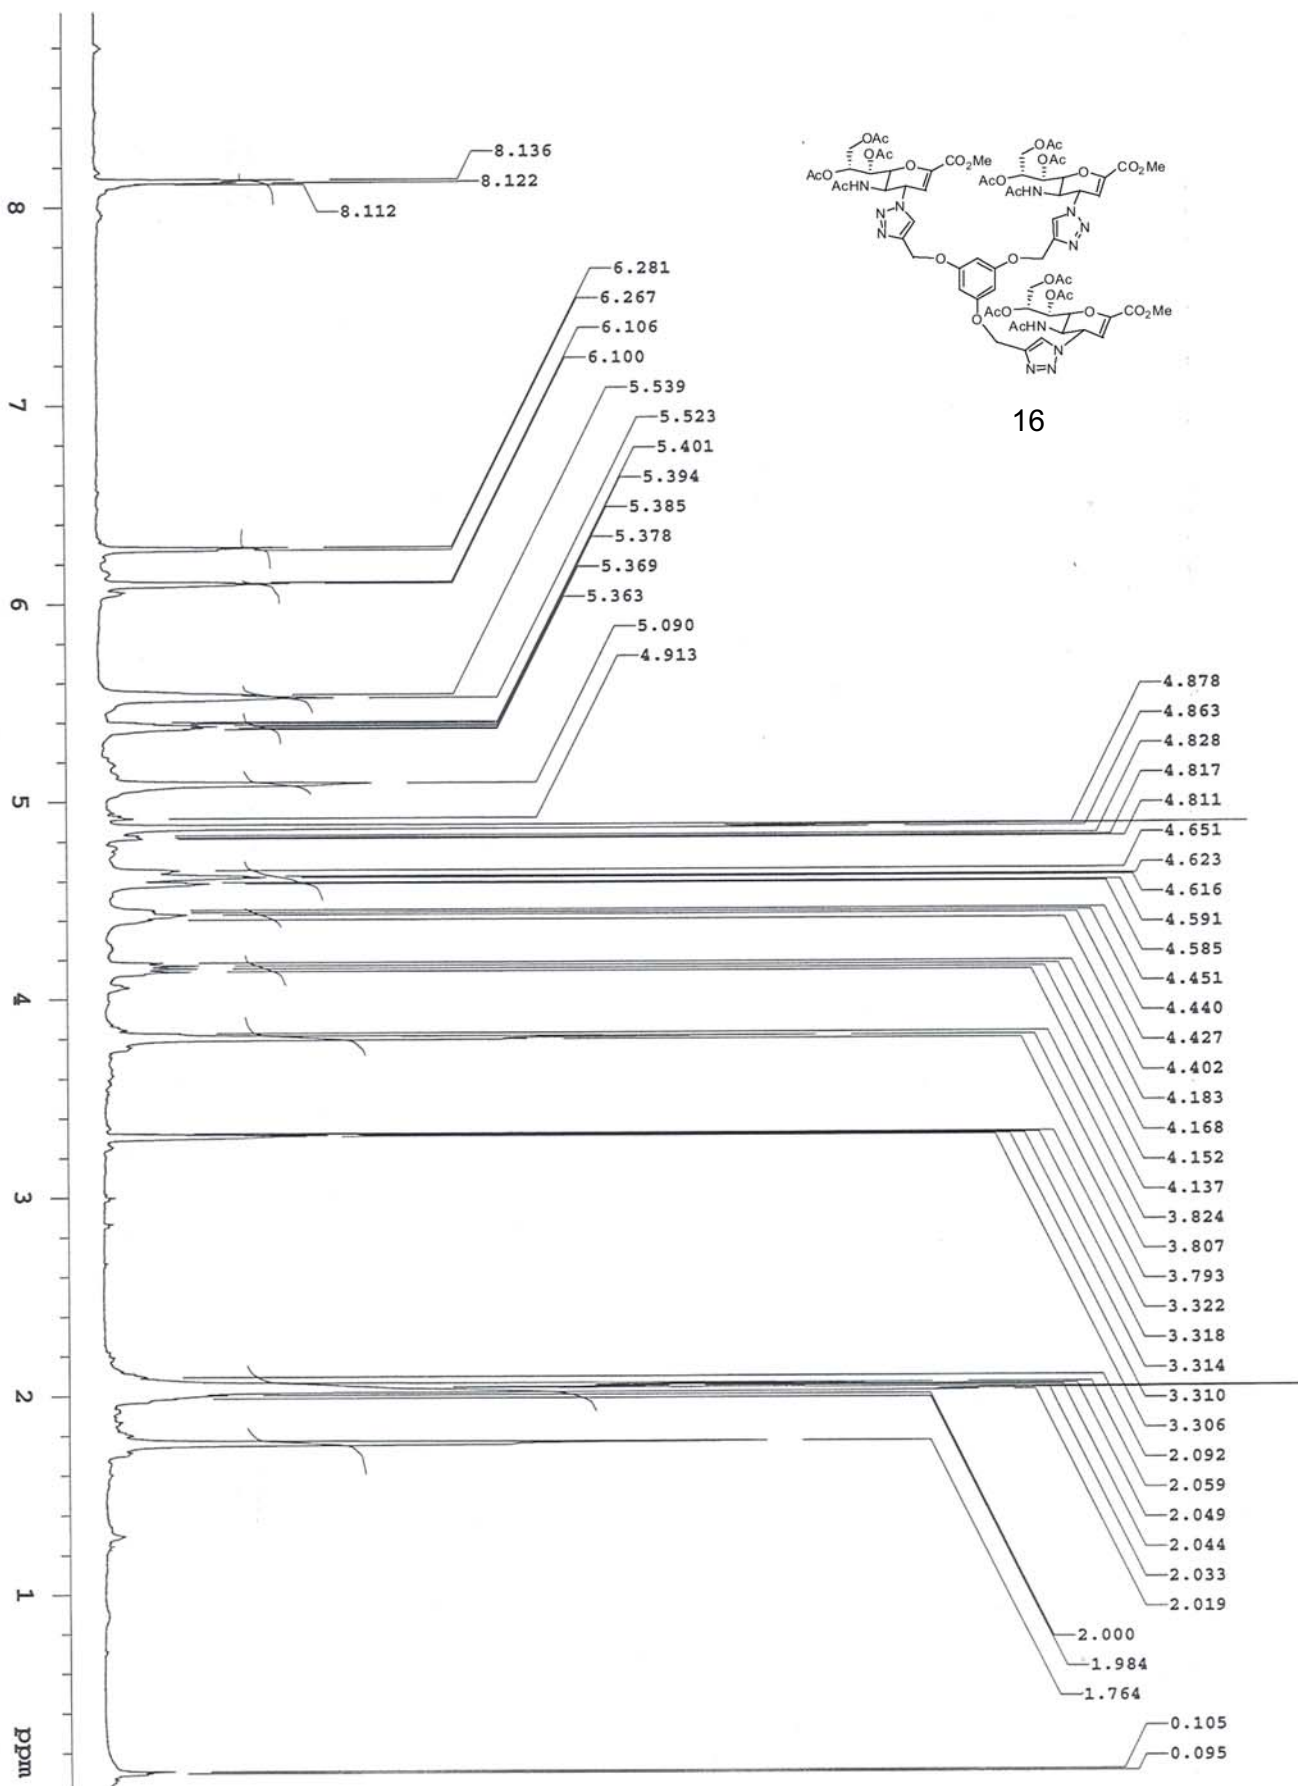

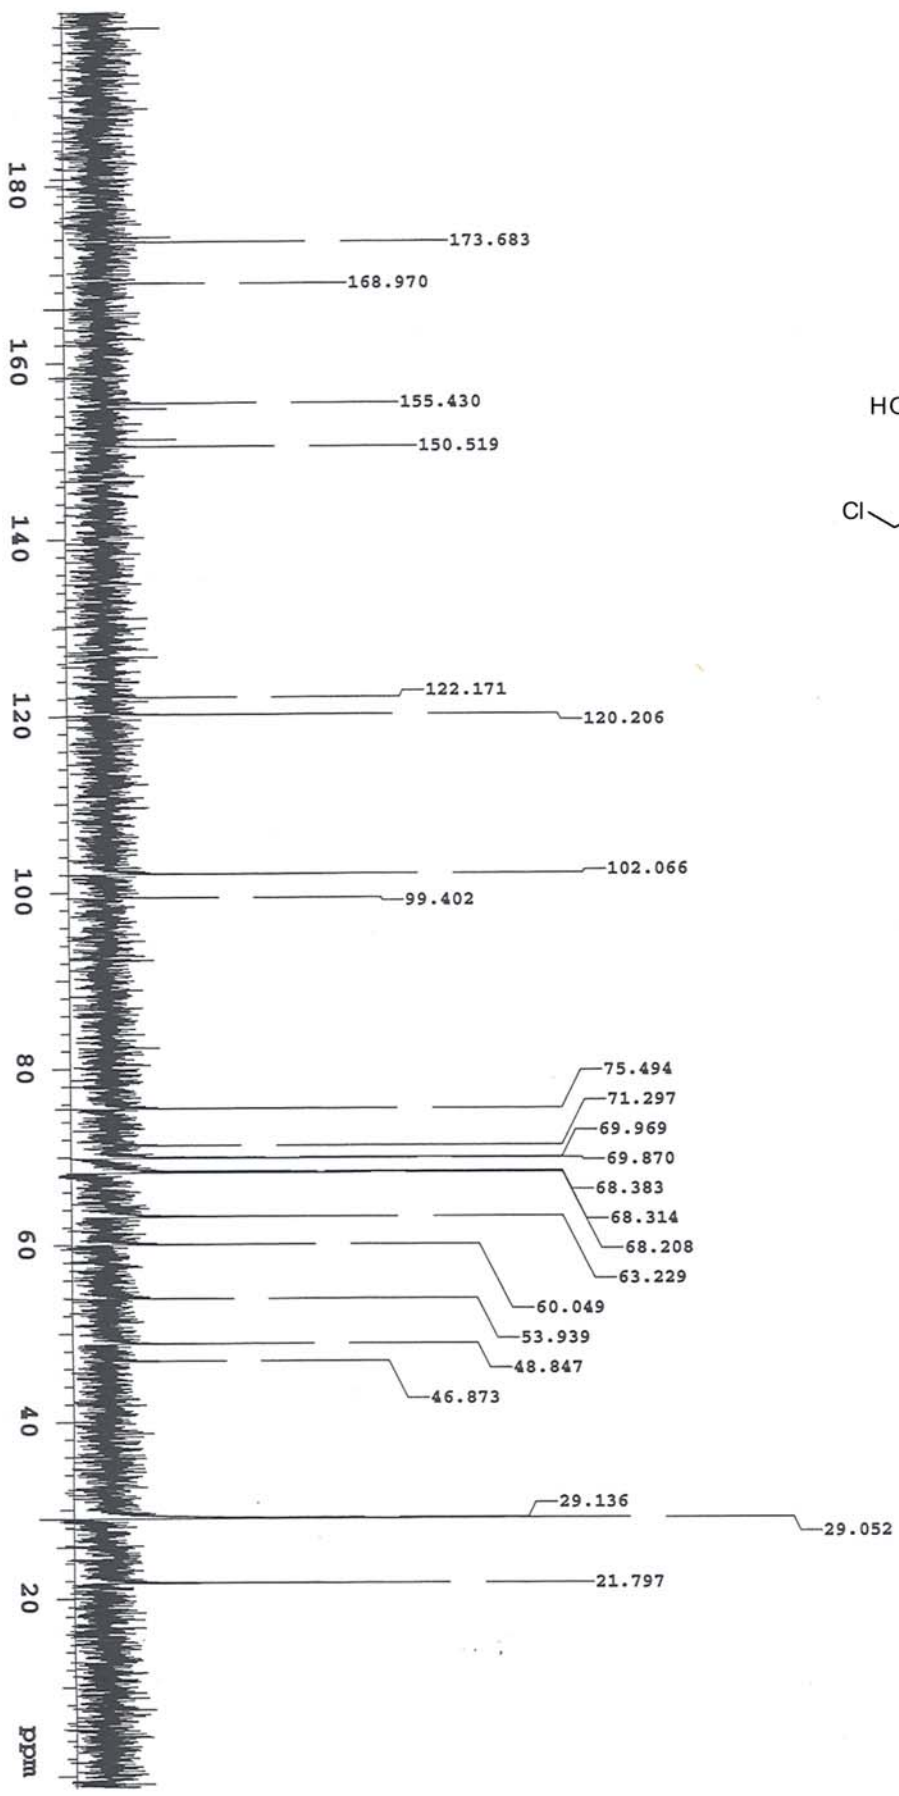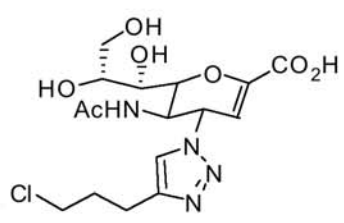

17

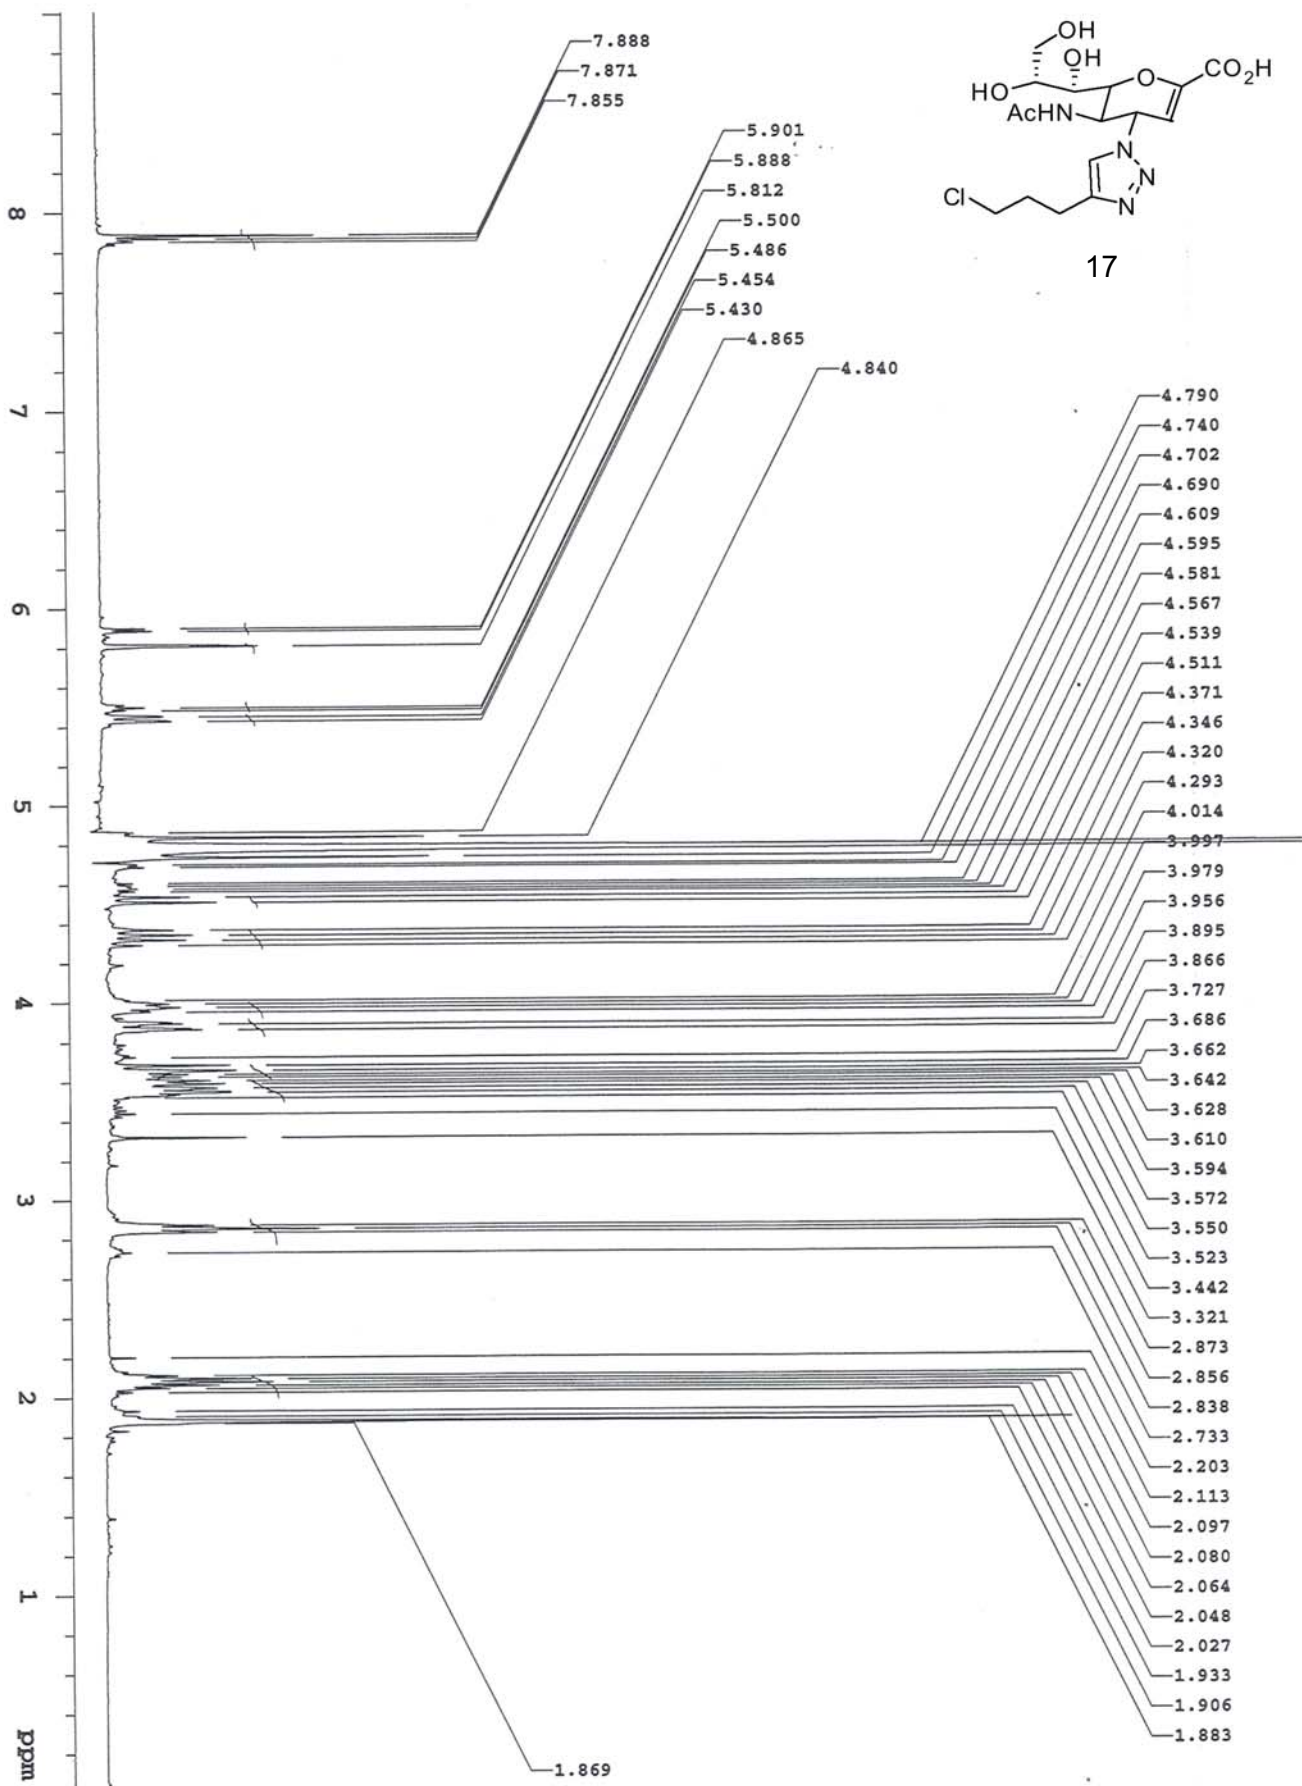

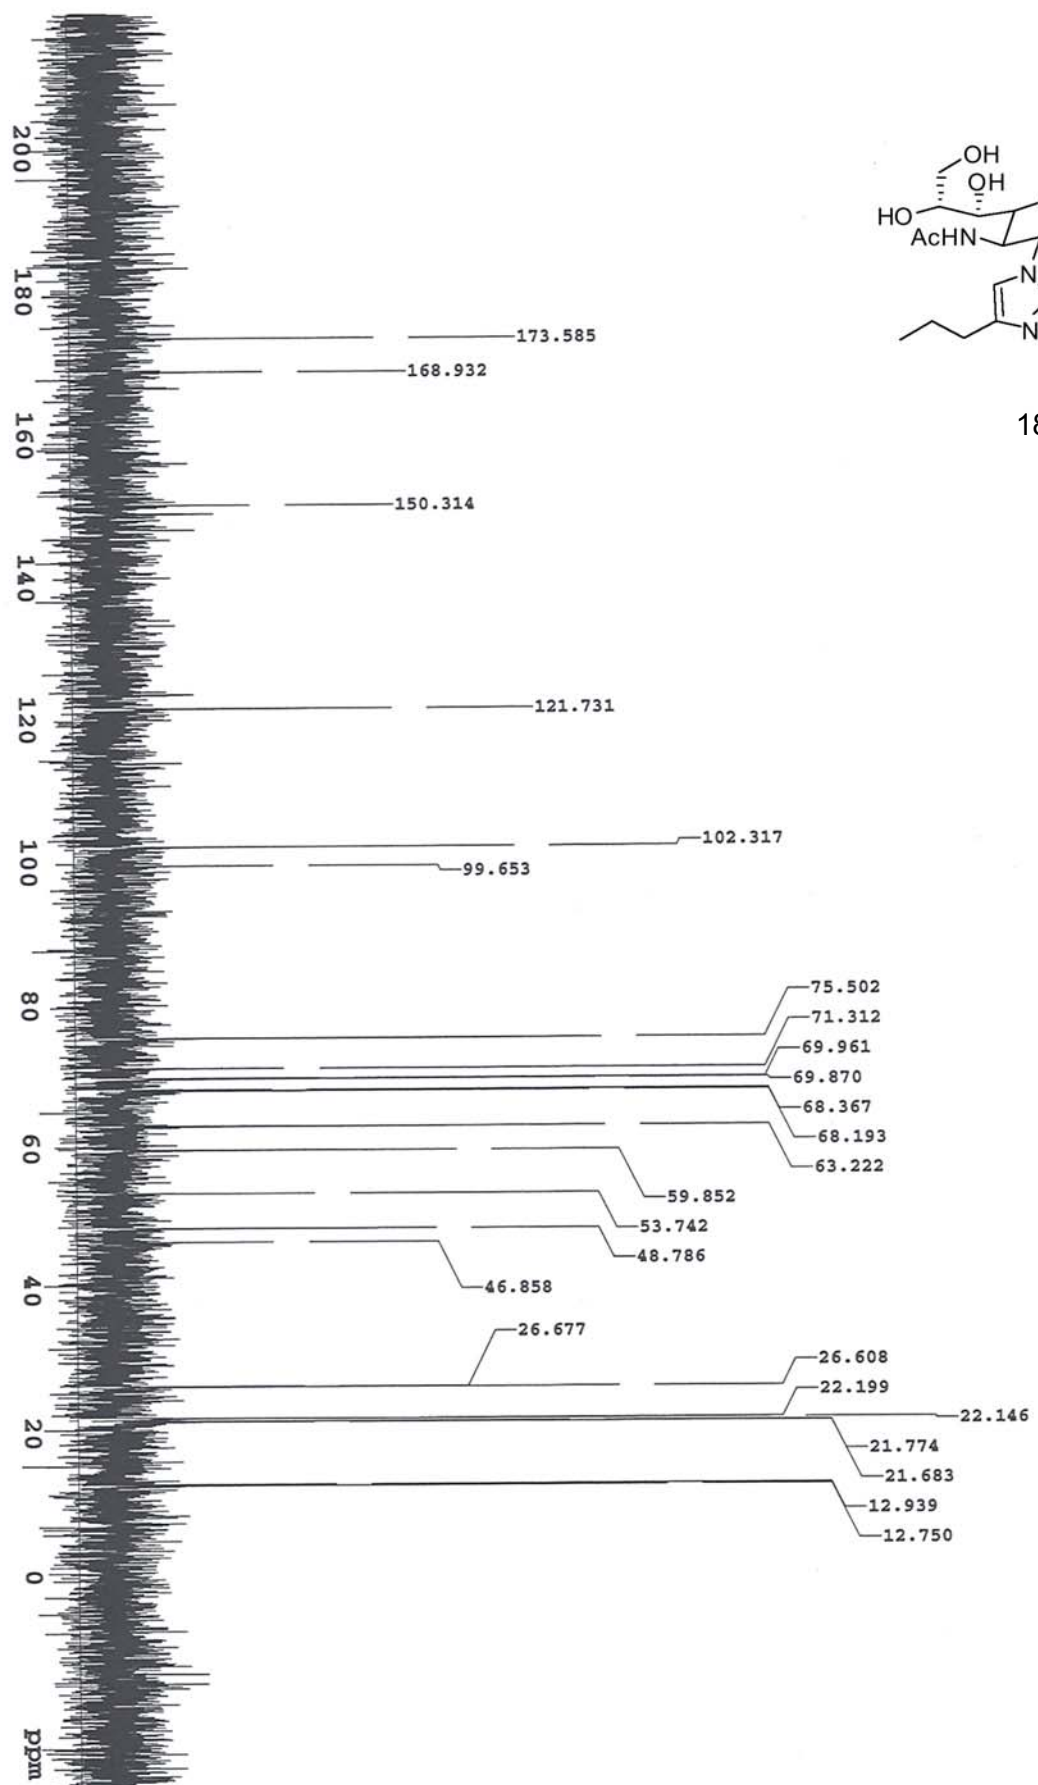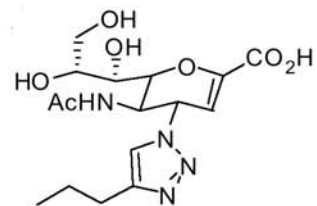

18

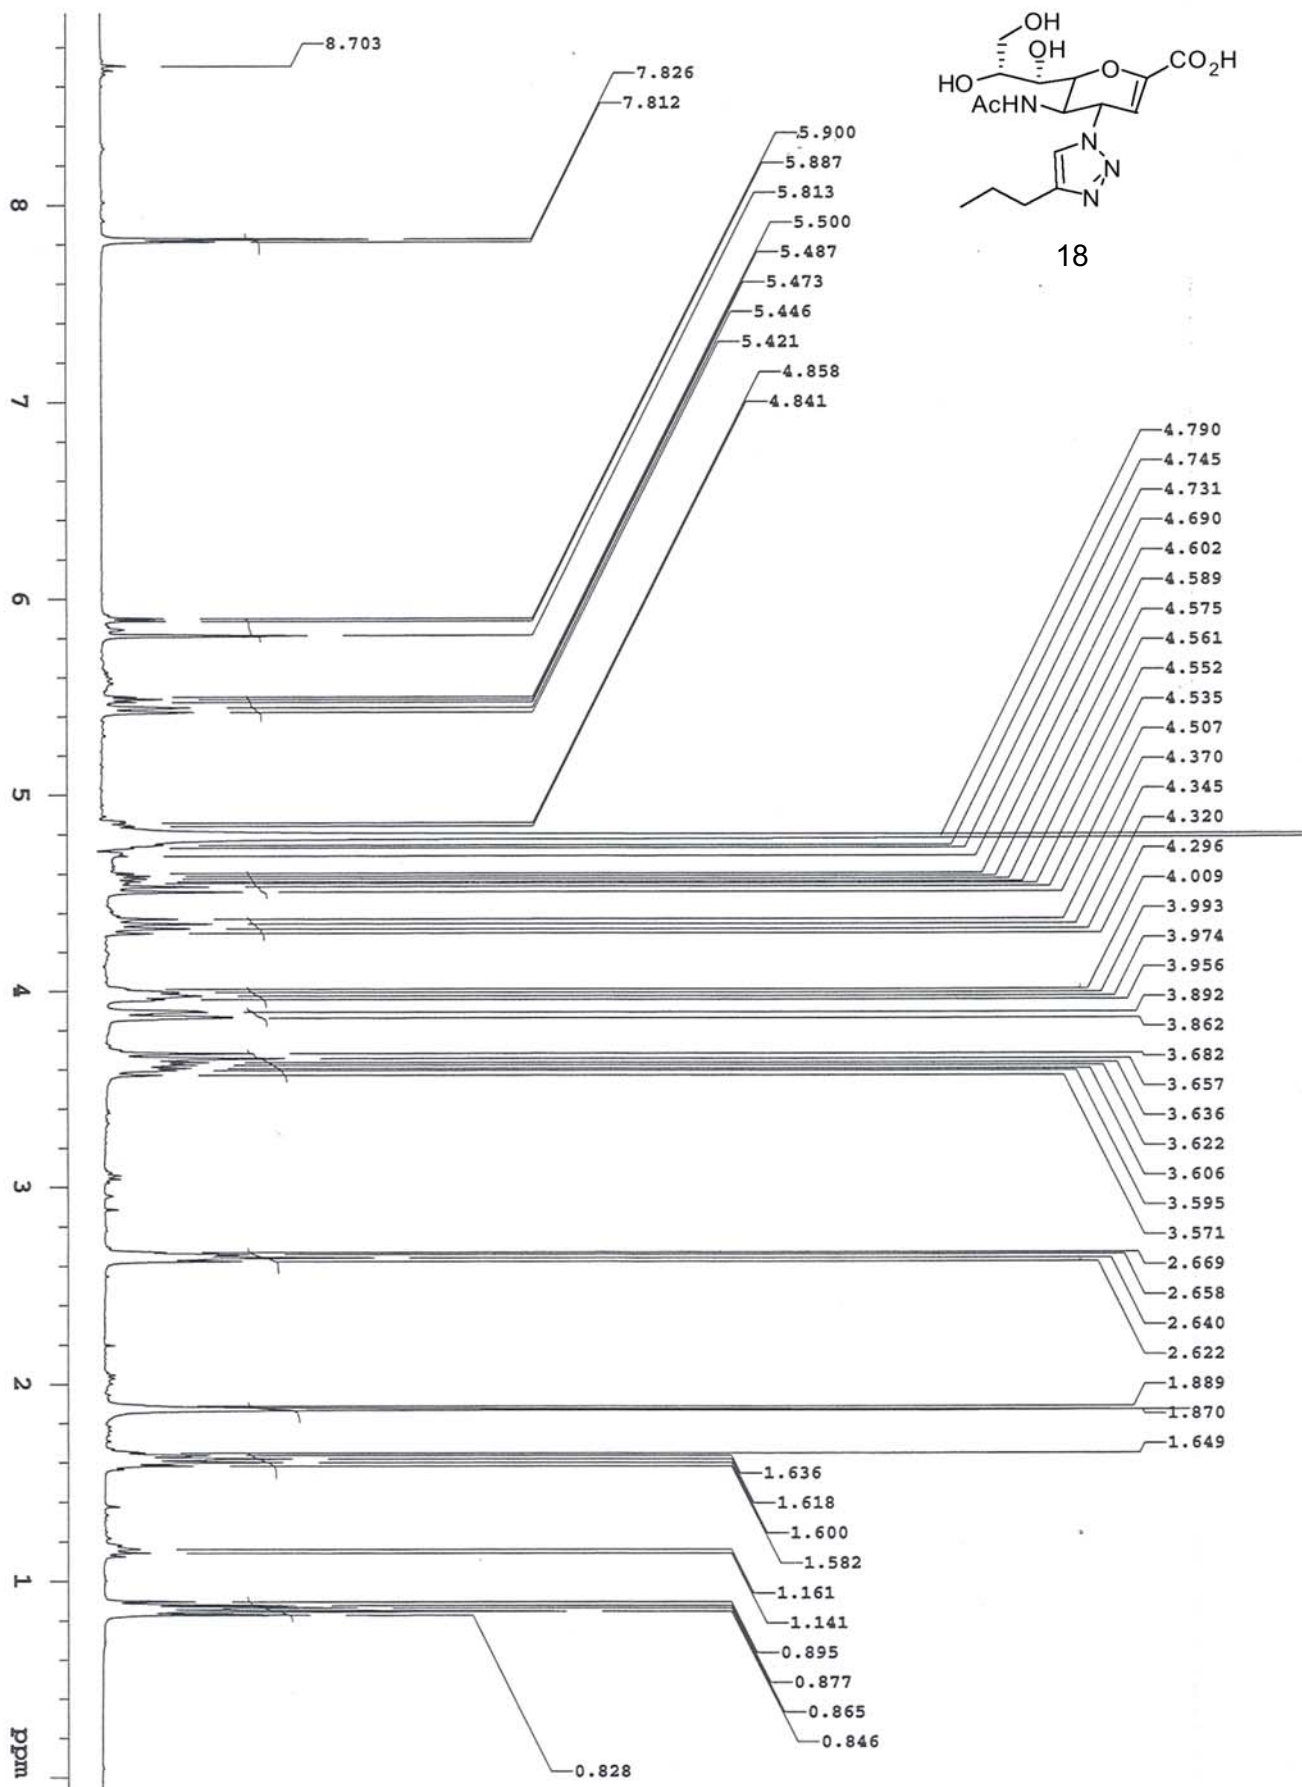



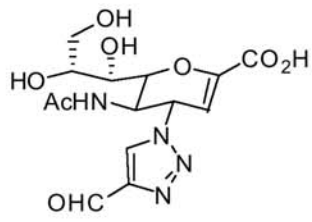

19

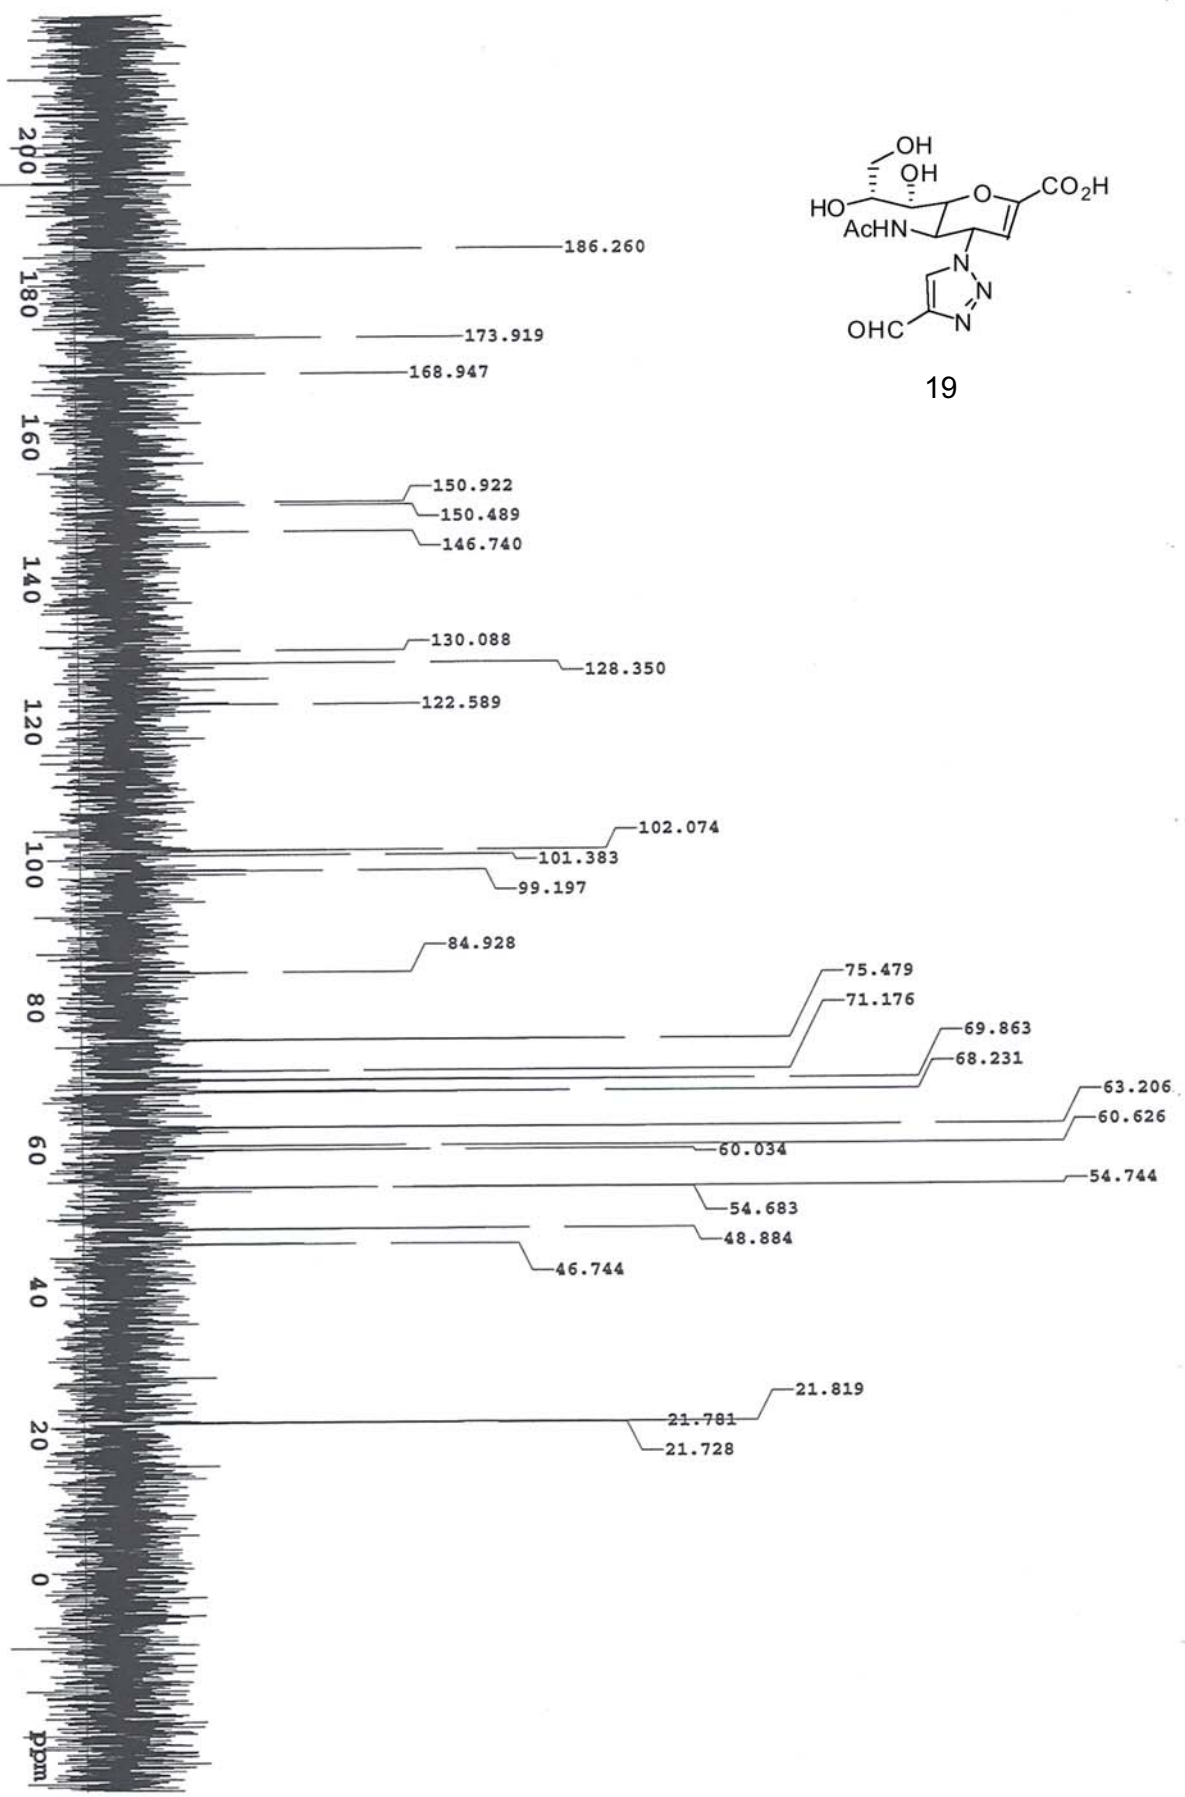

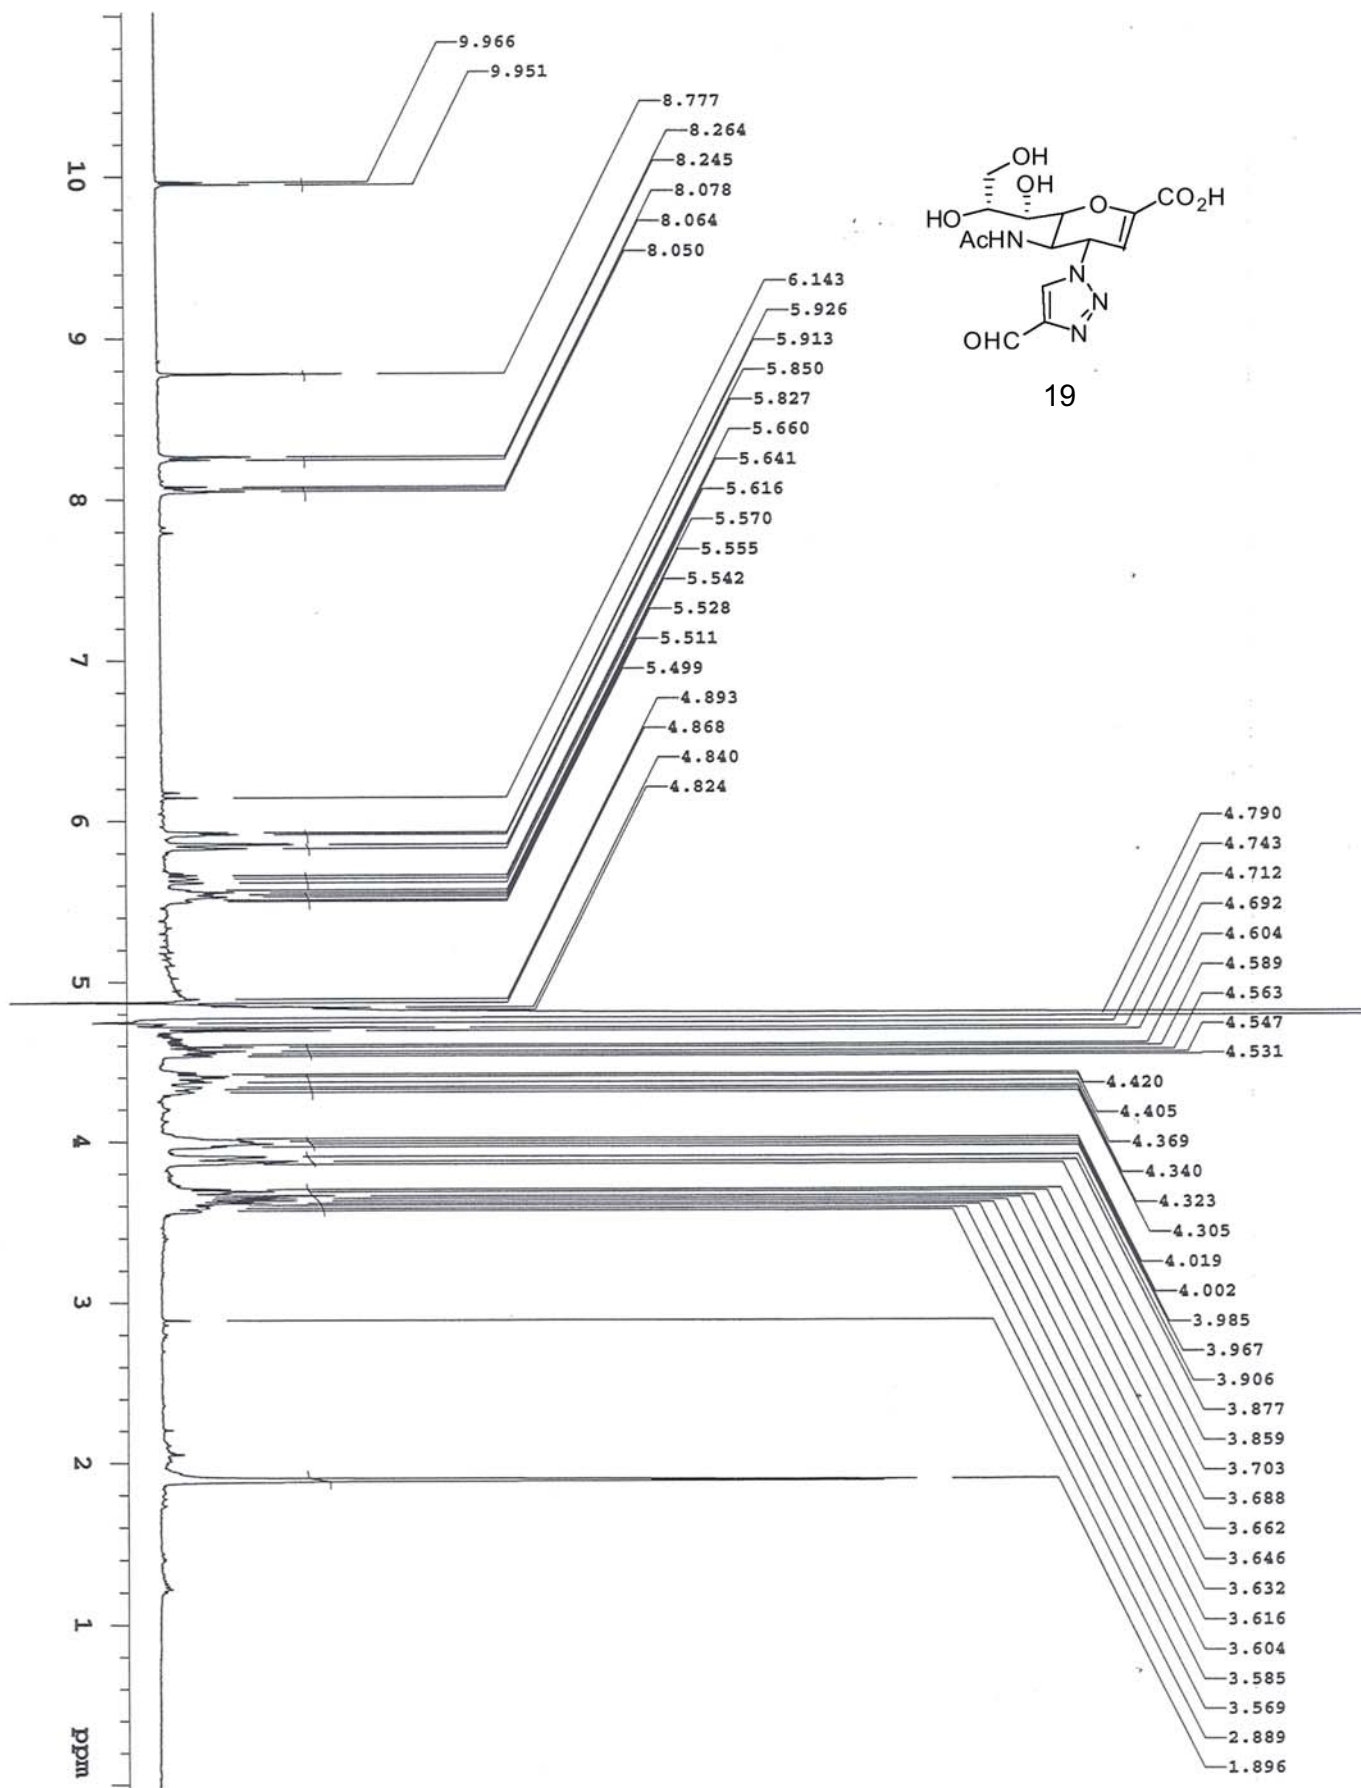

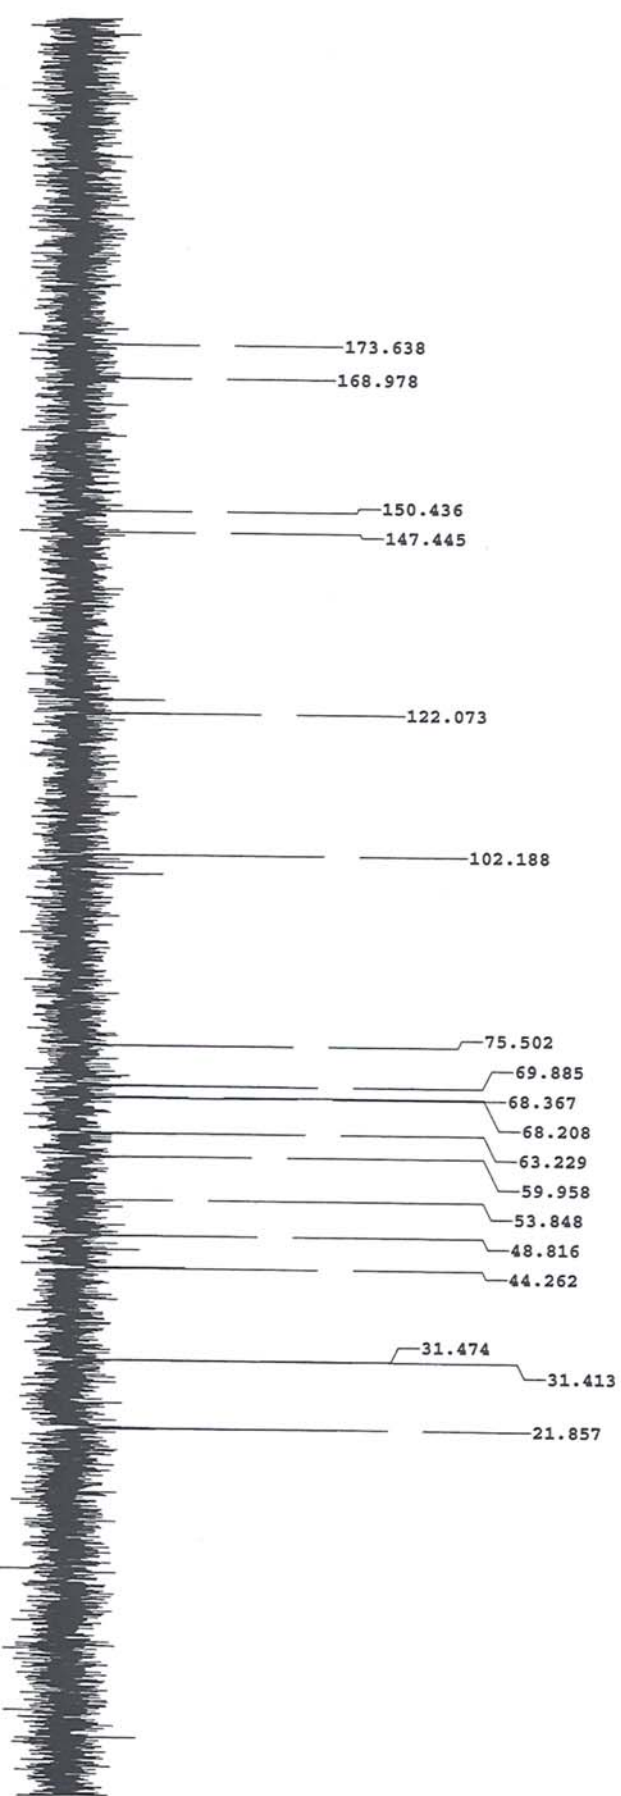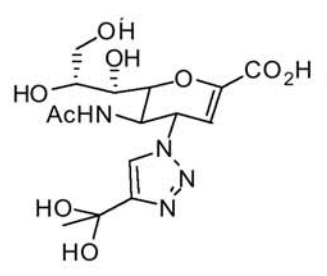

20

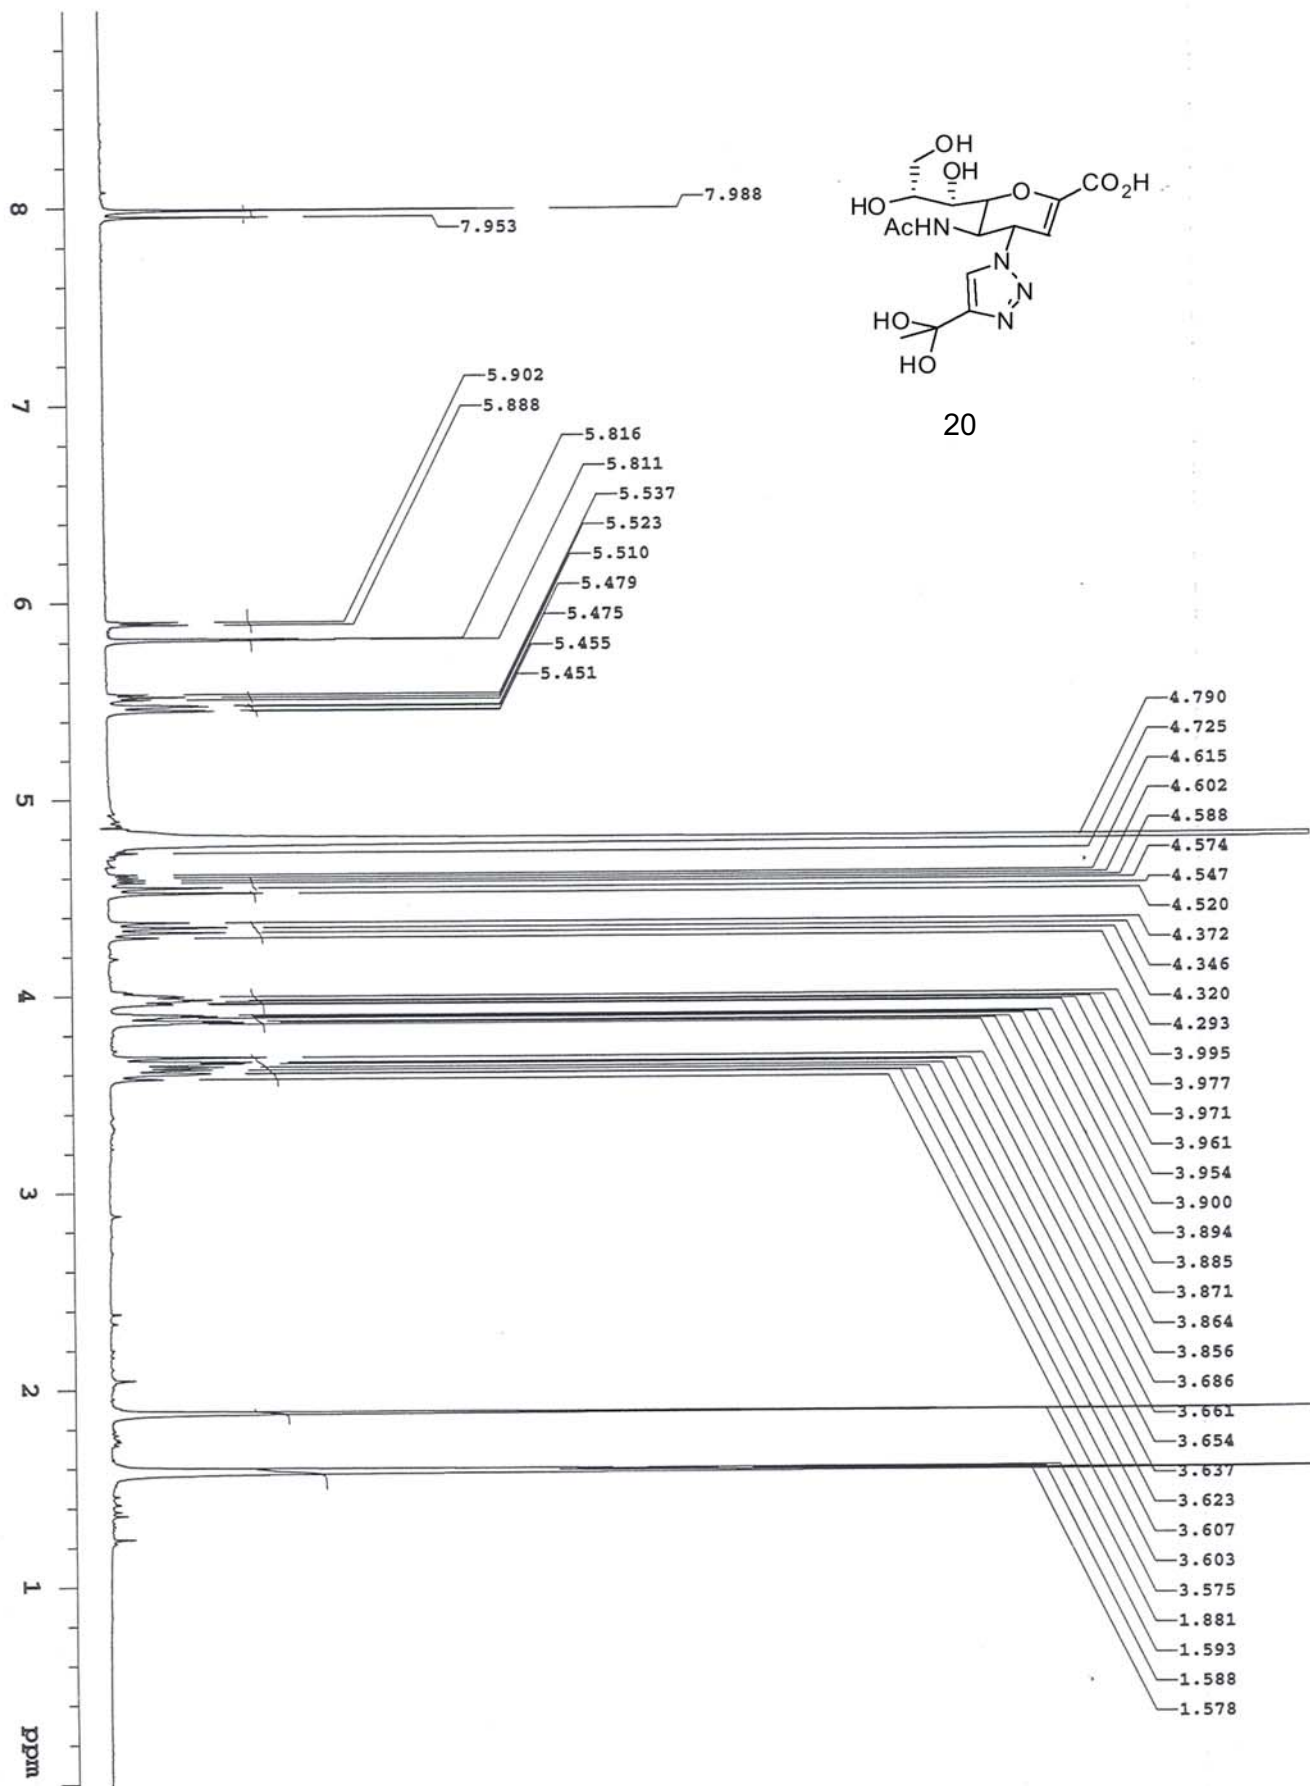

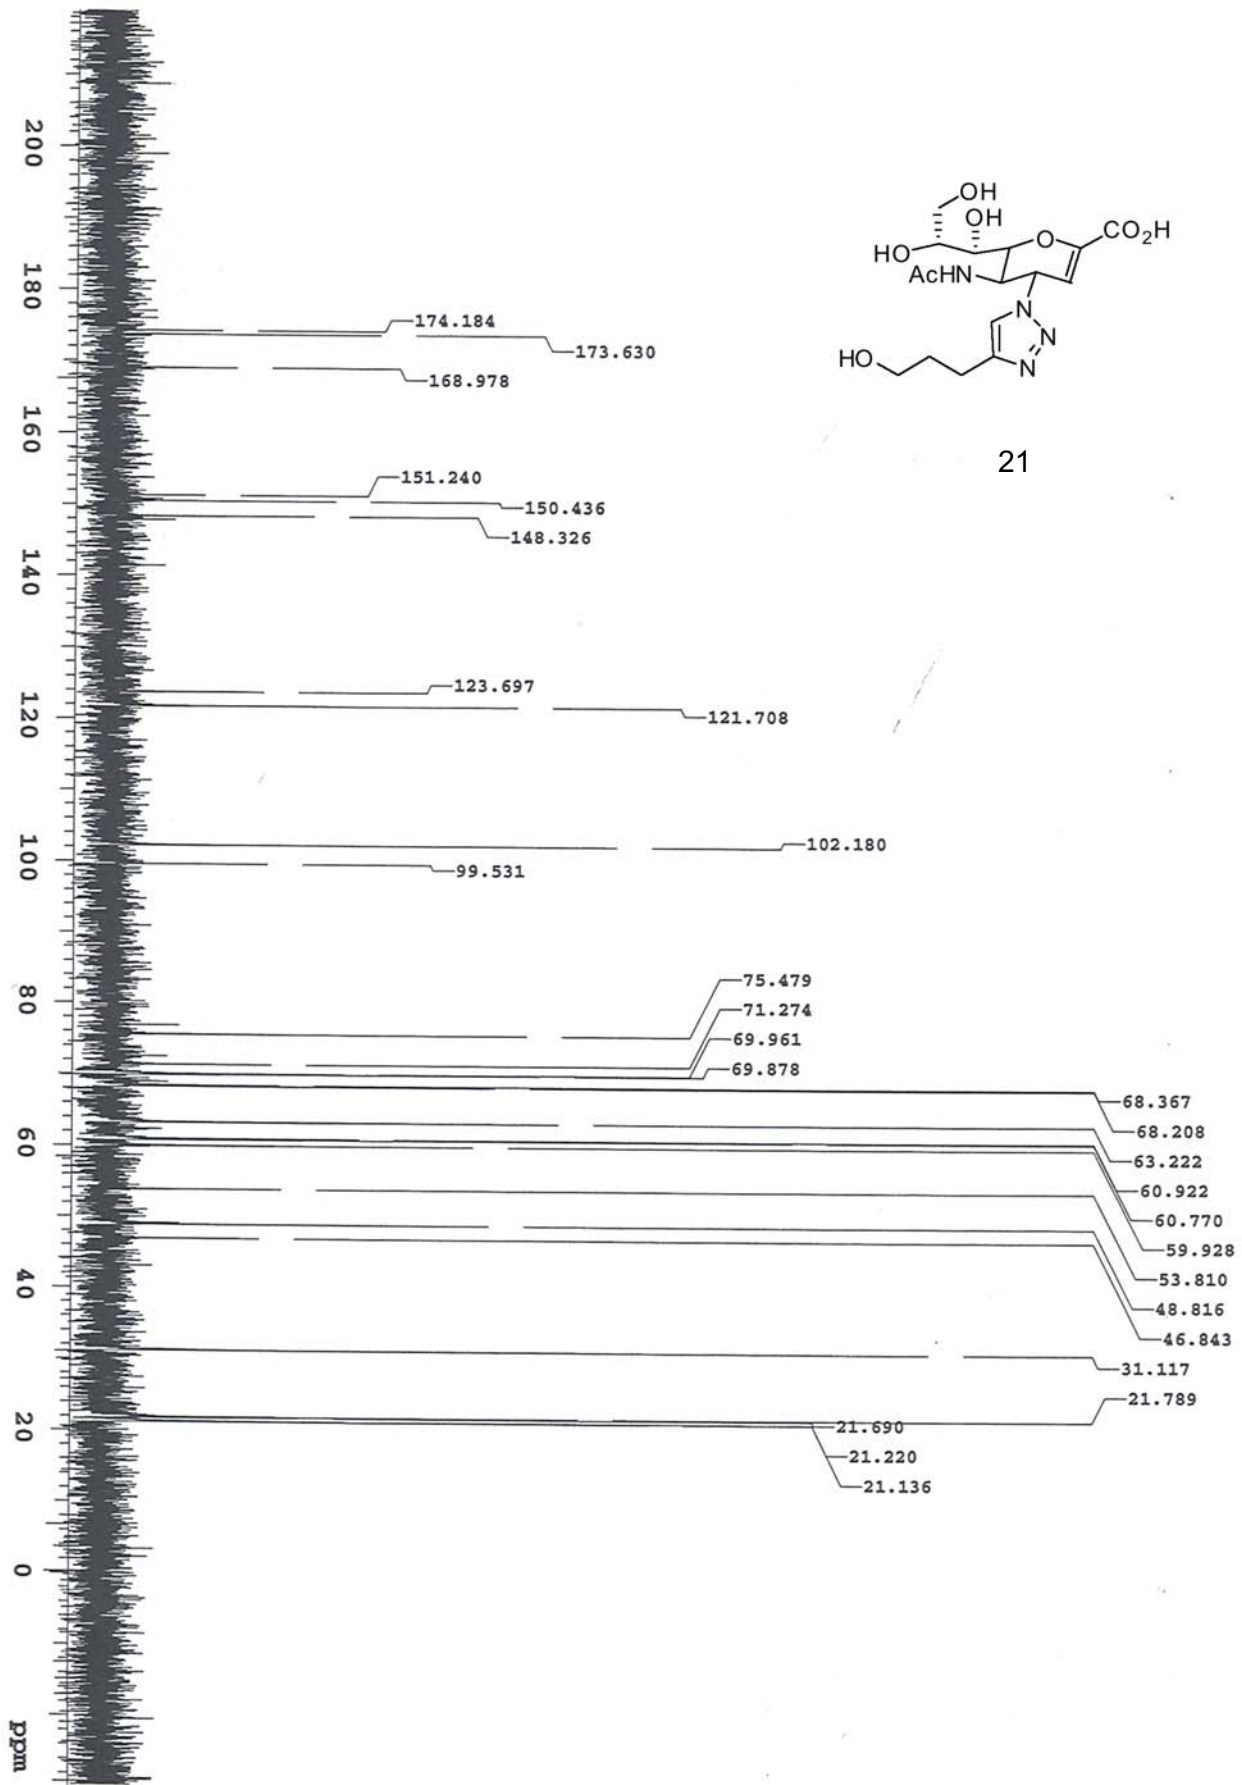

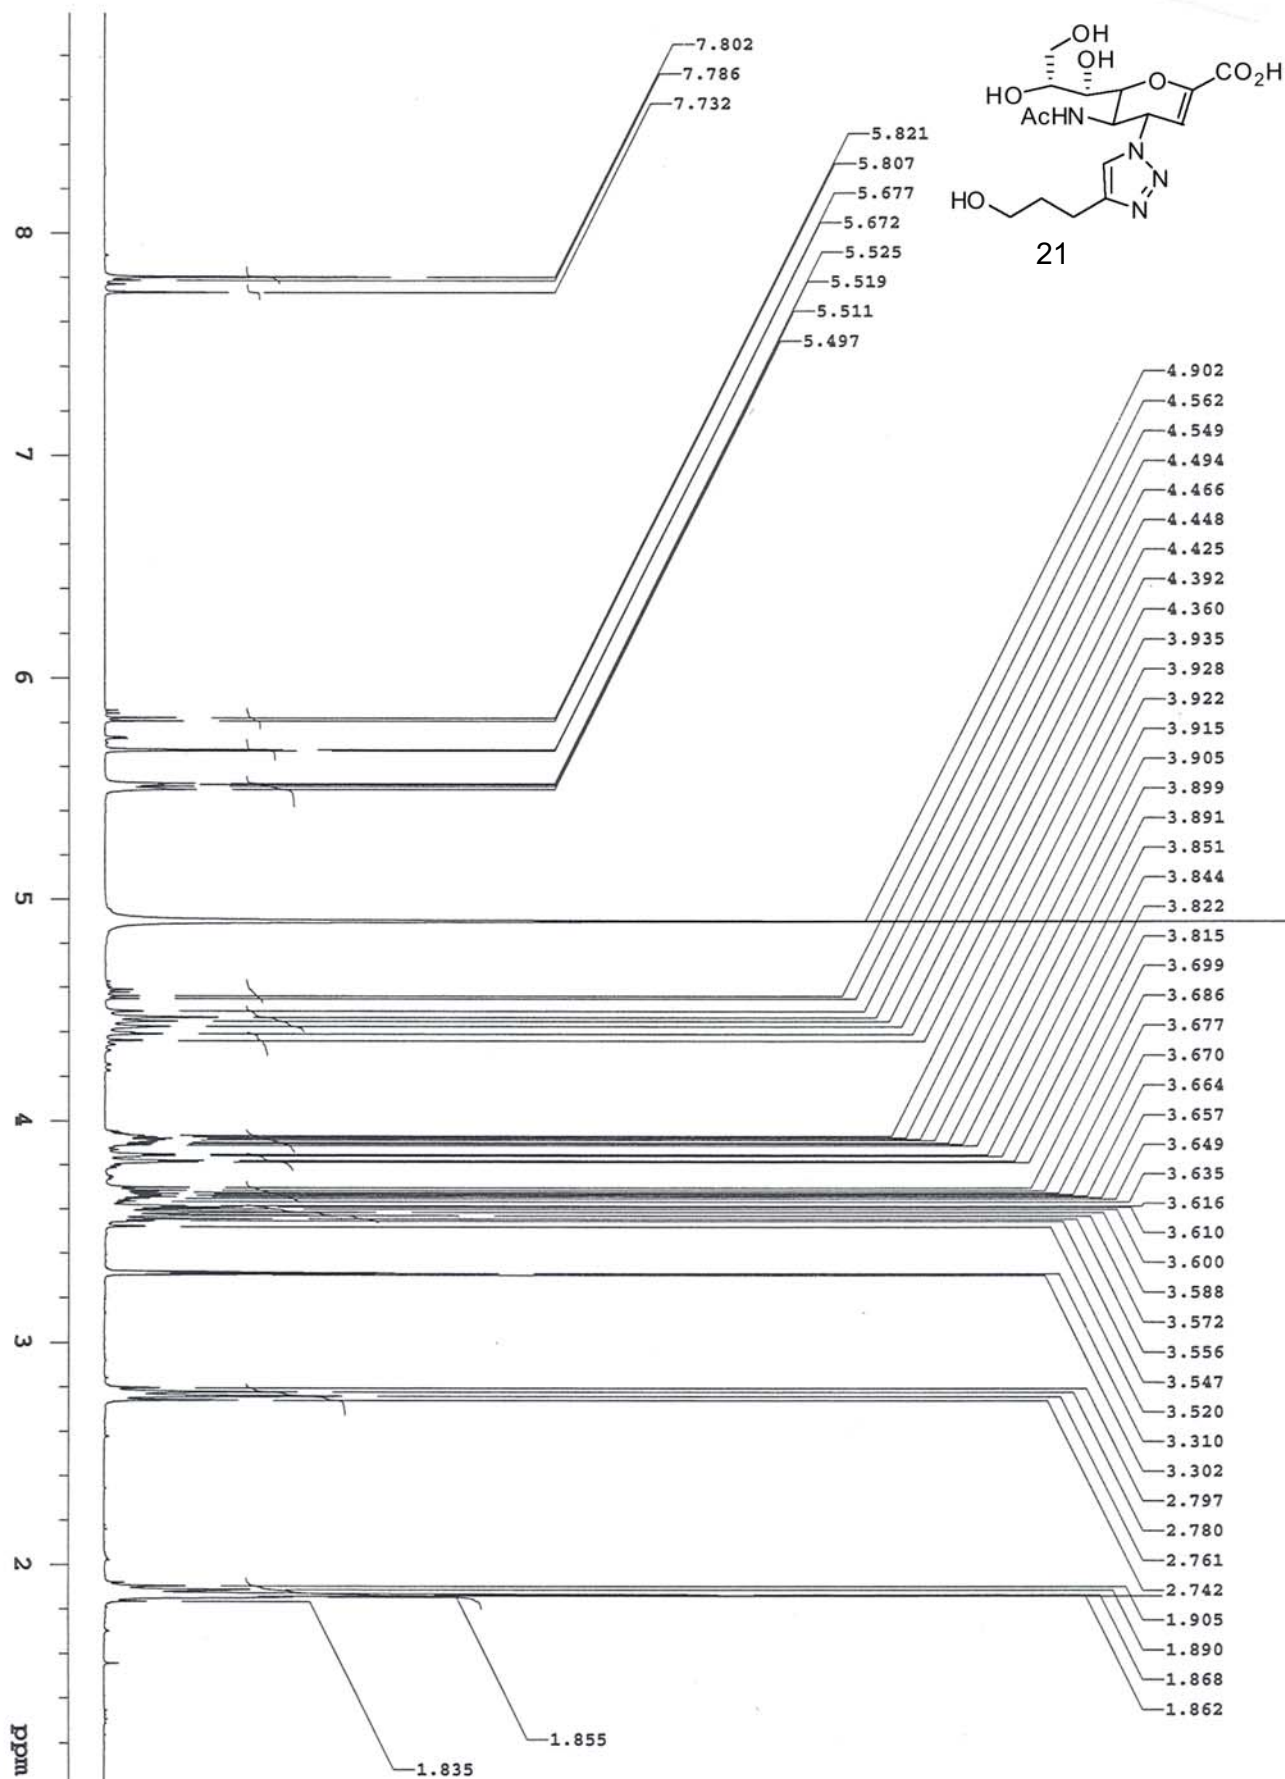

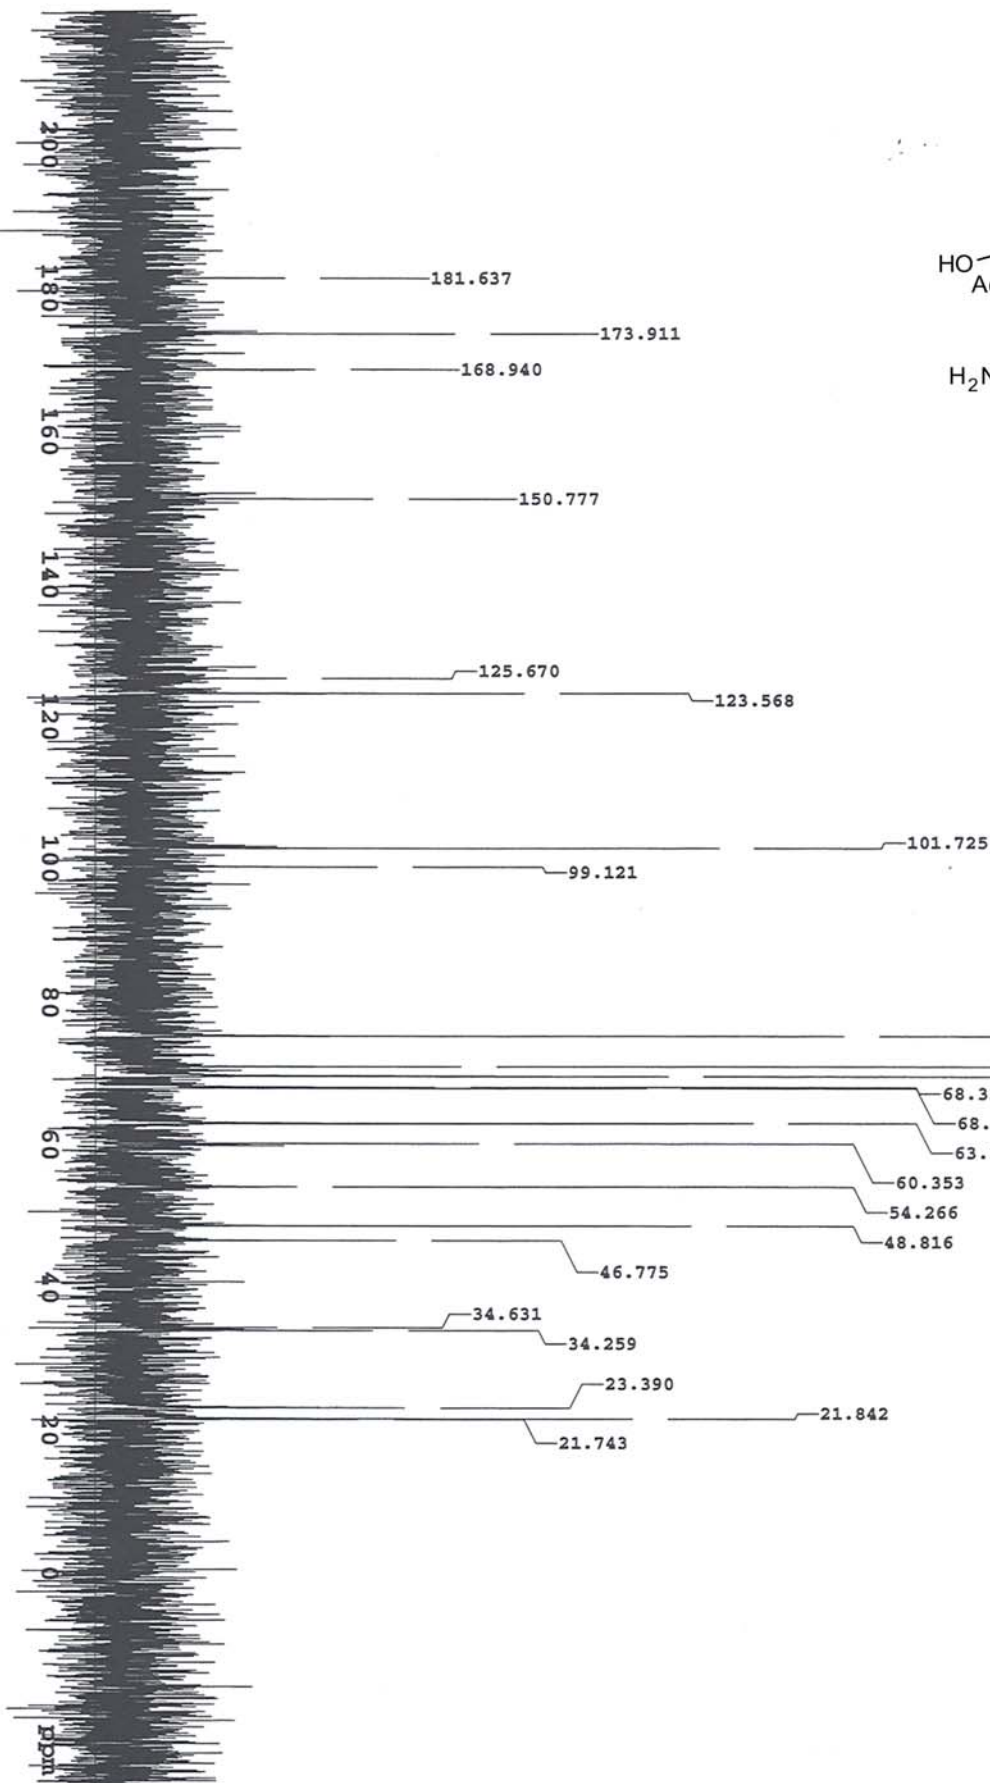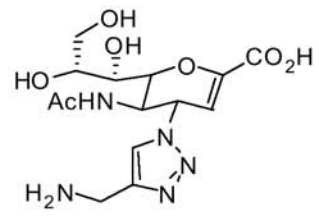

22

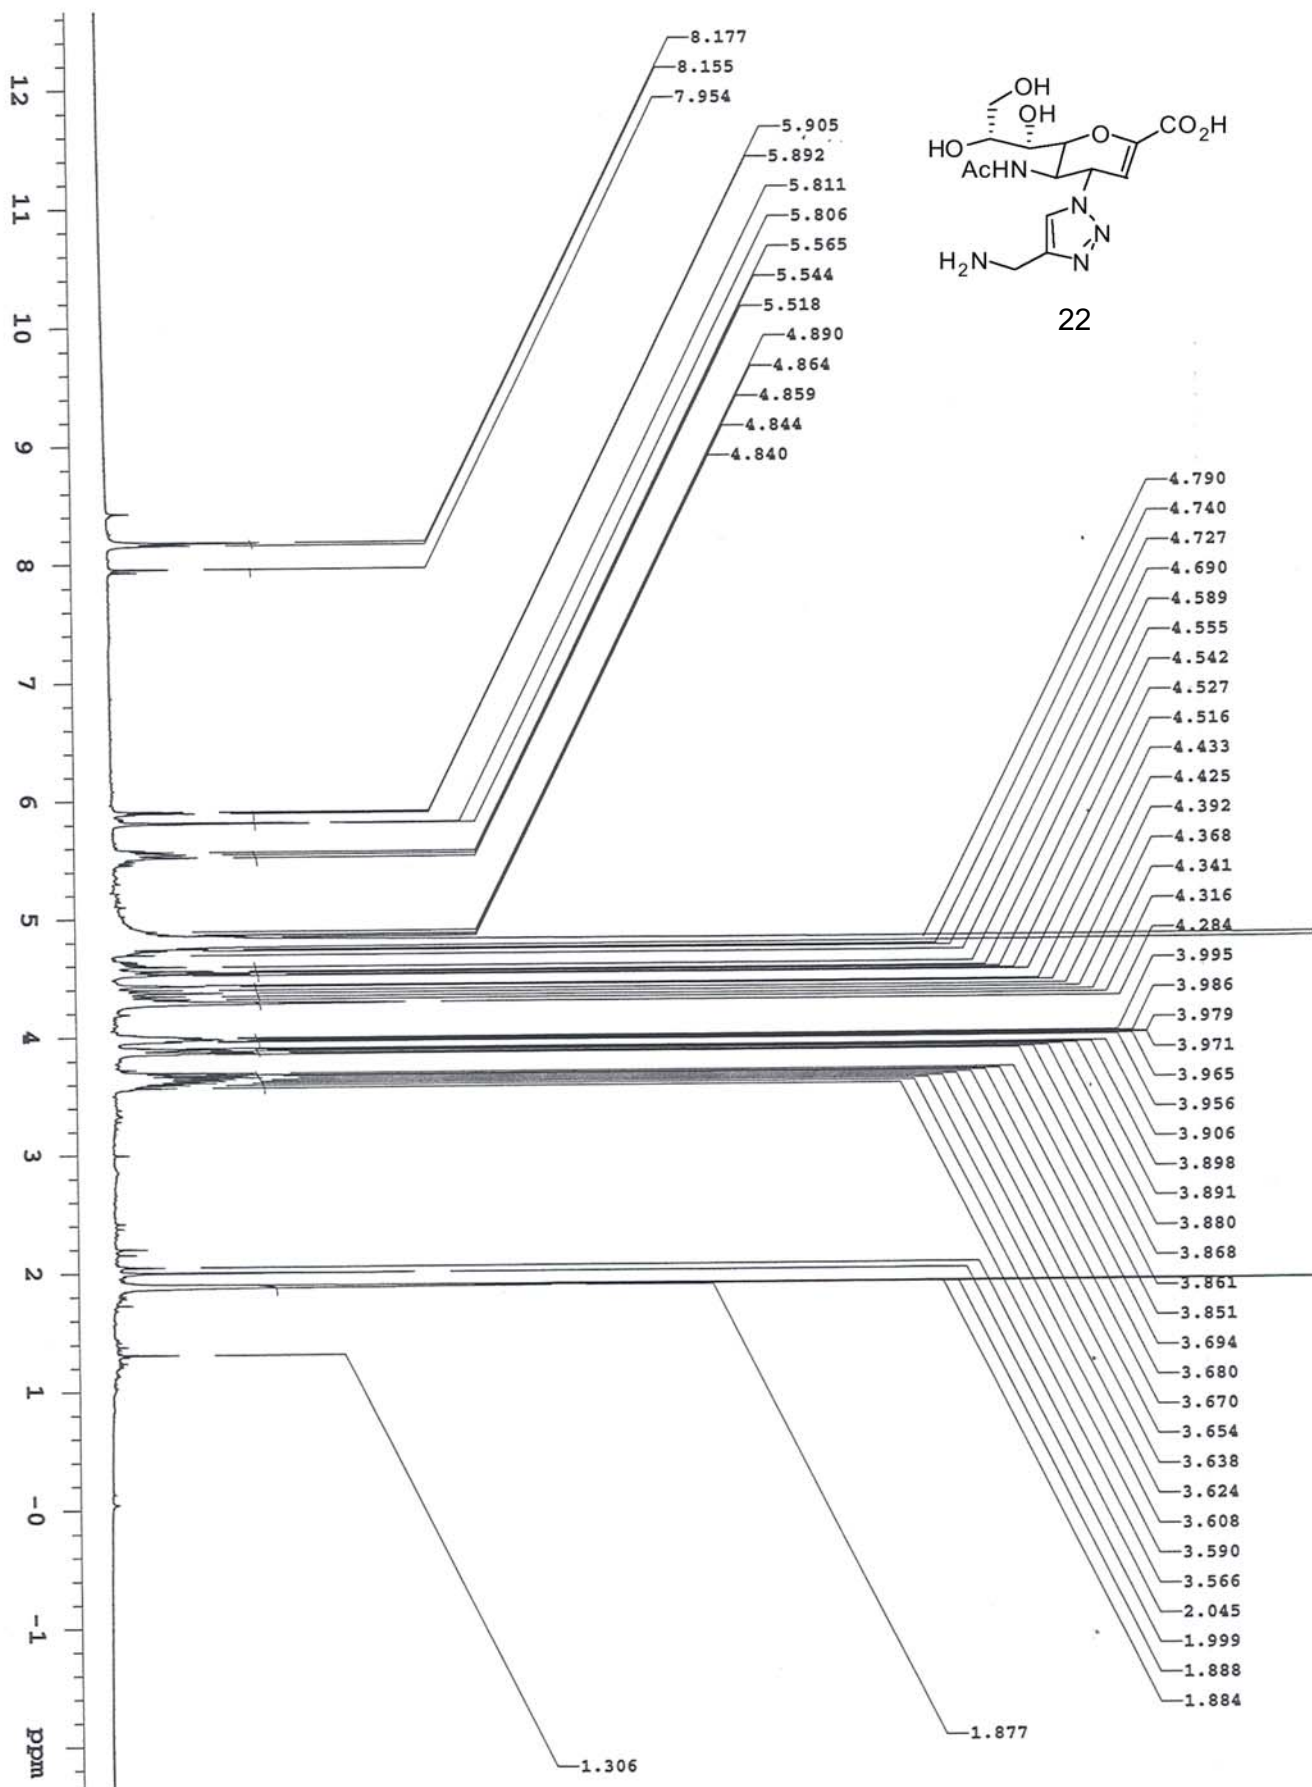



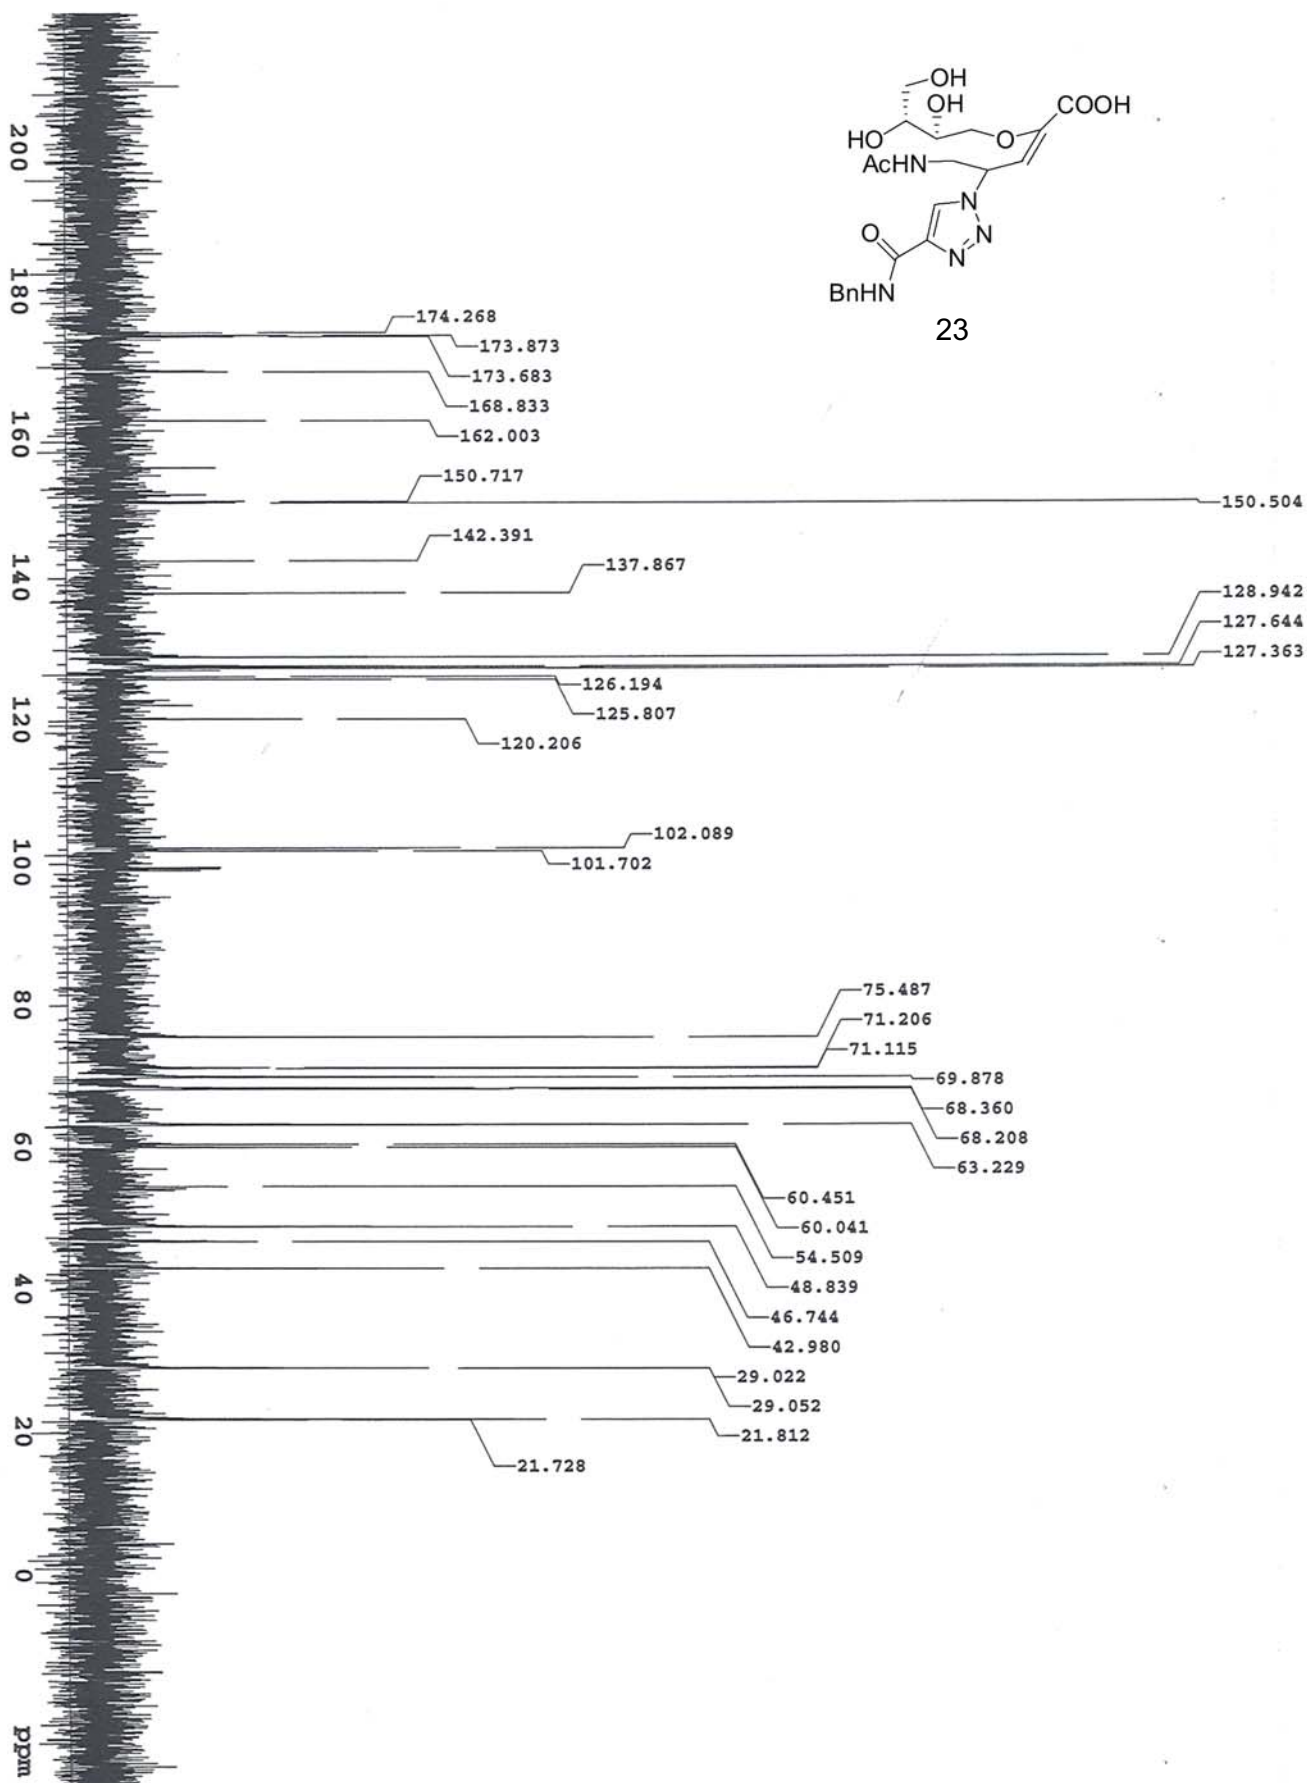

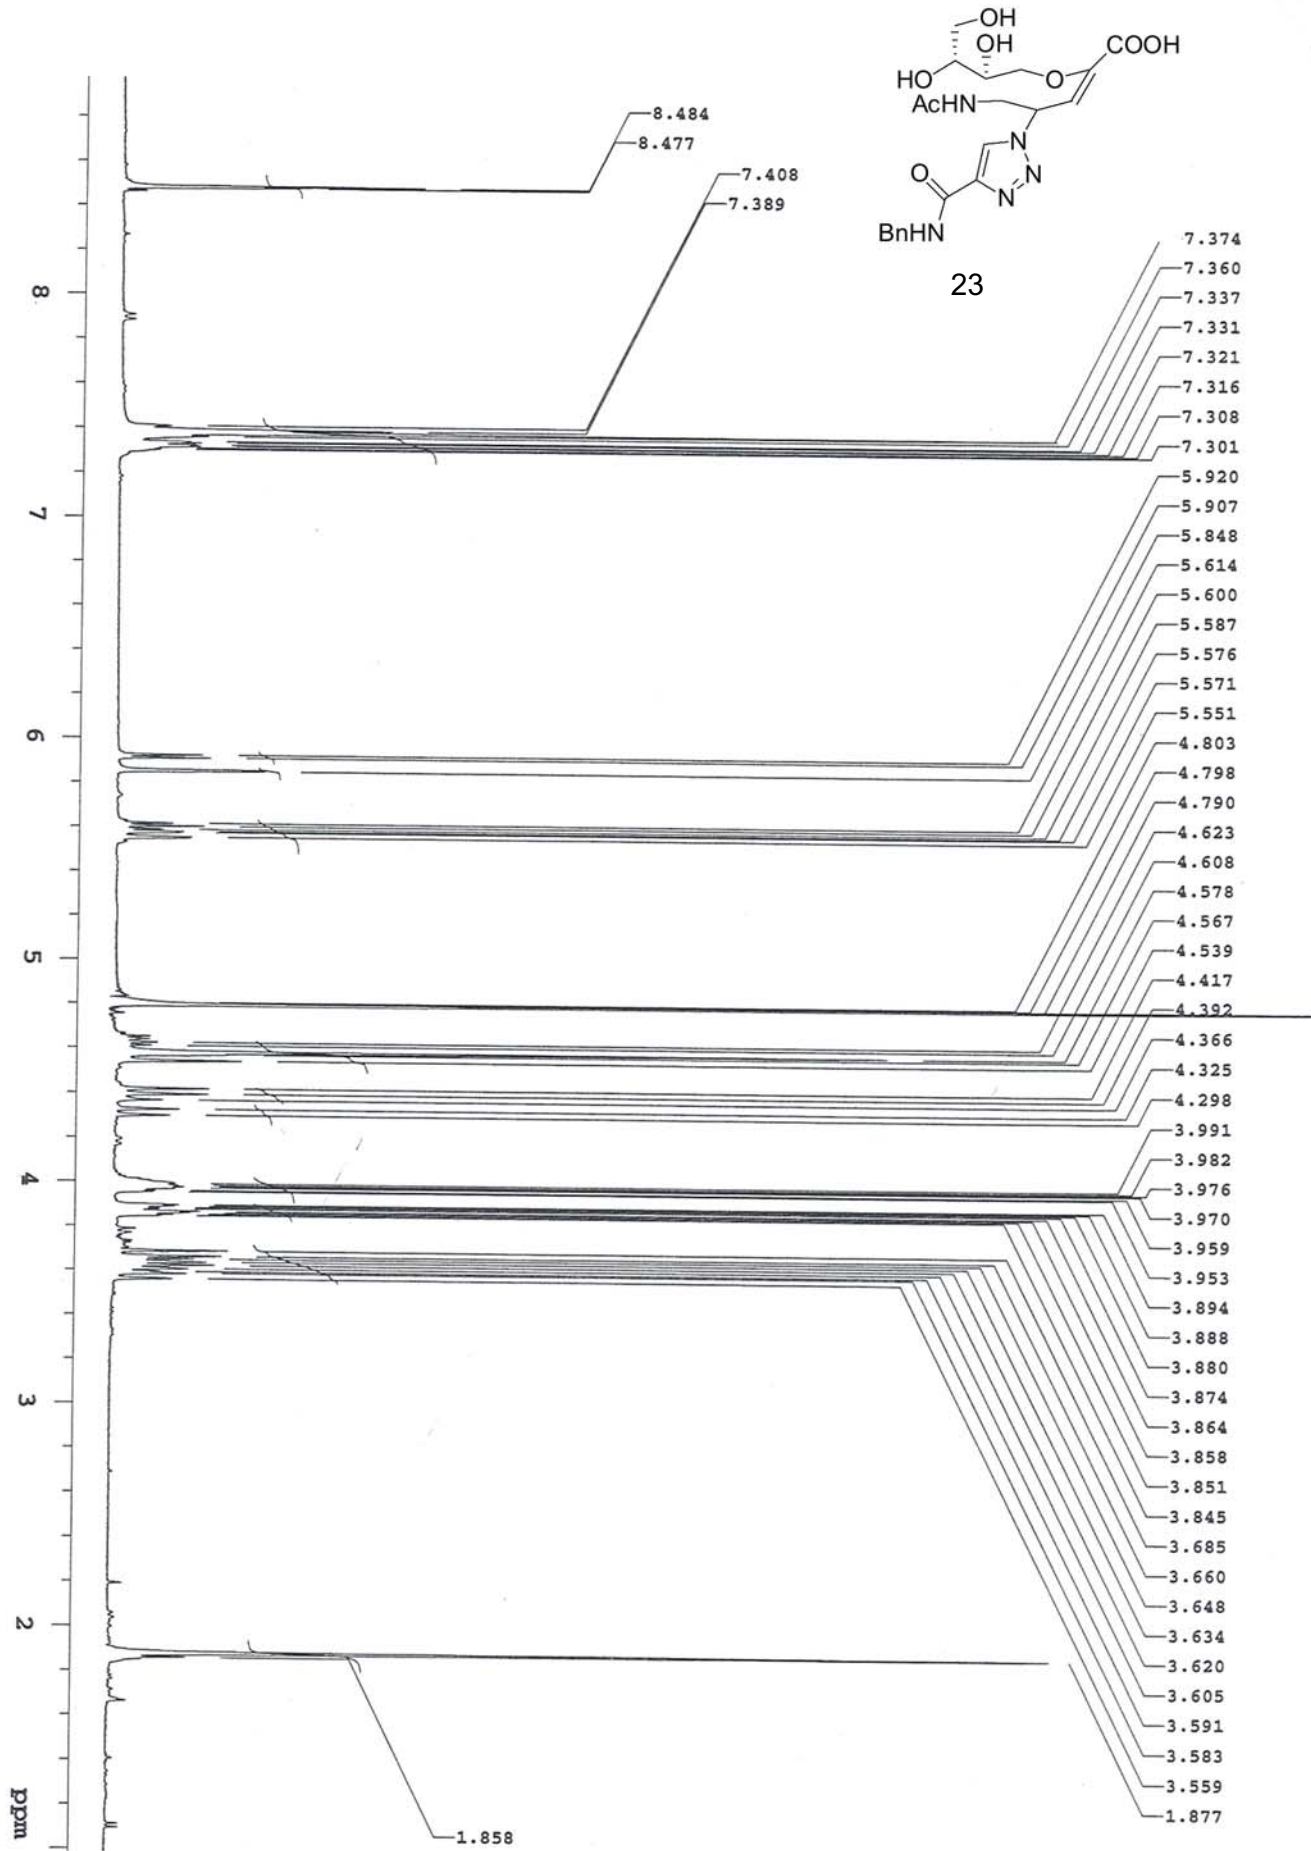

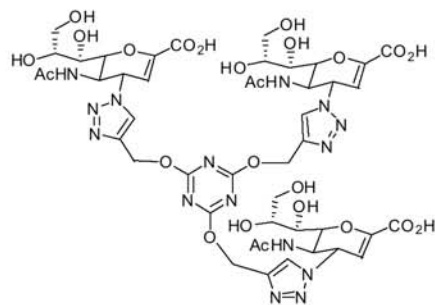

24

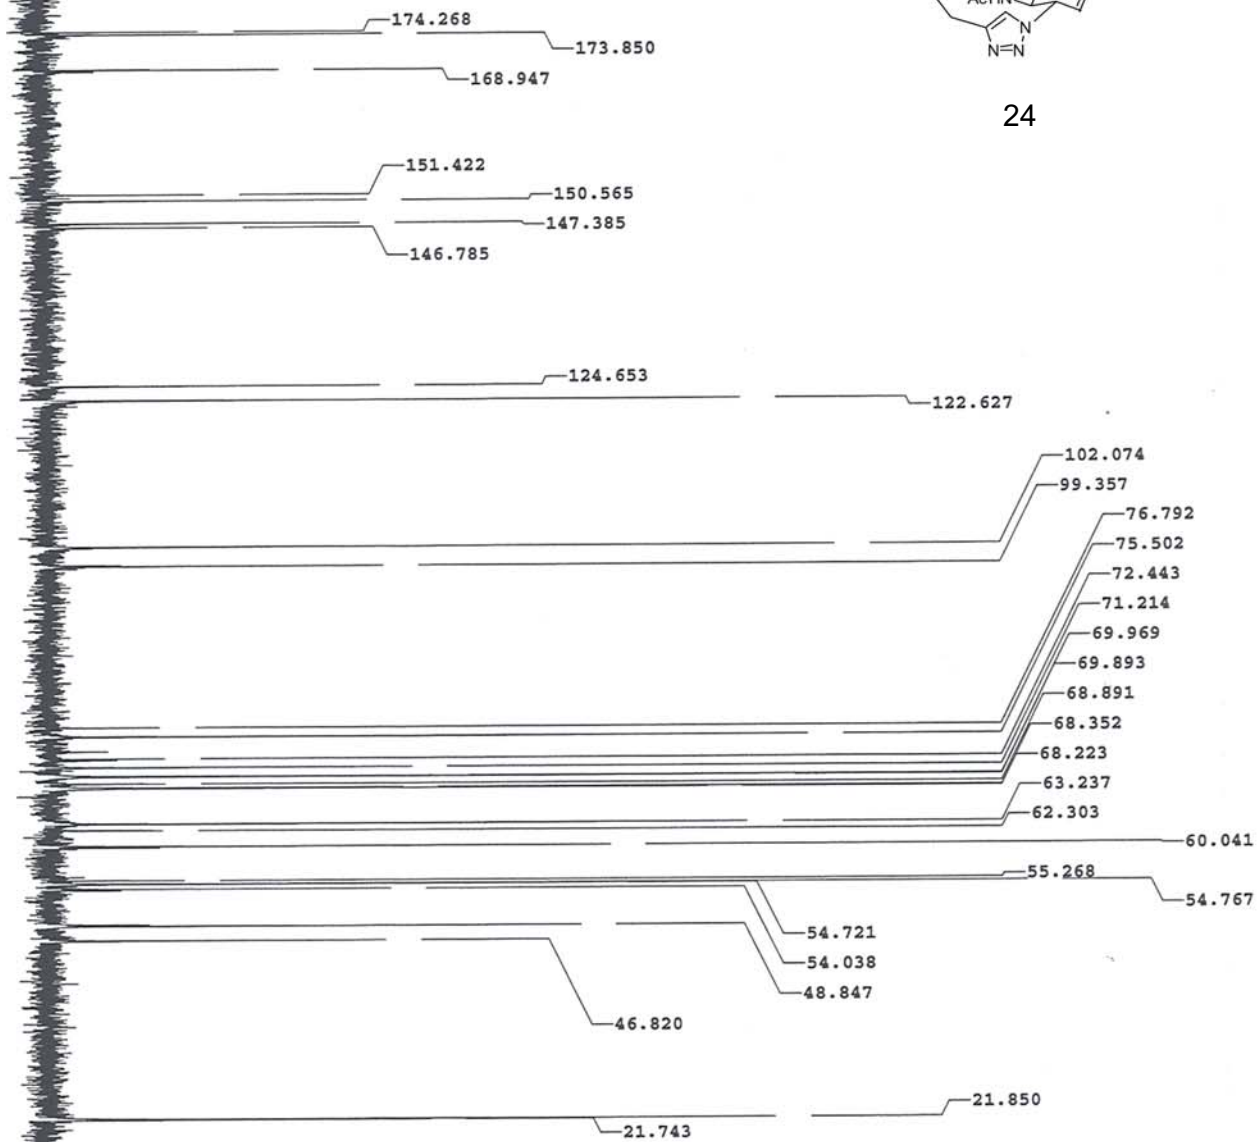

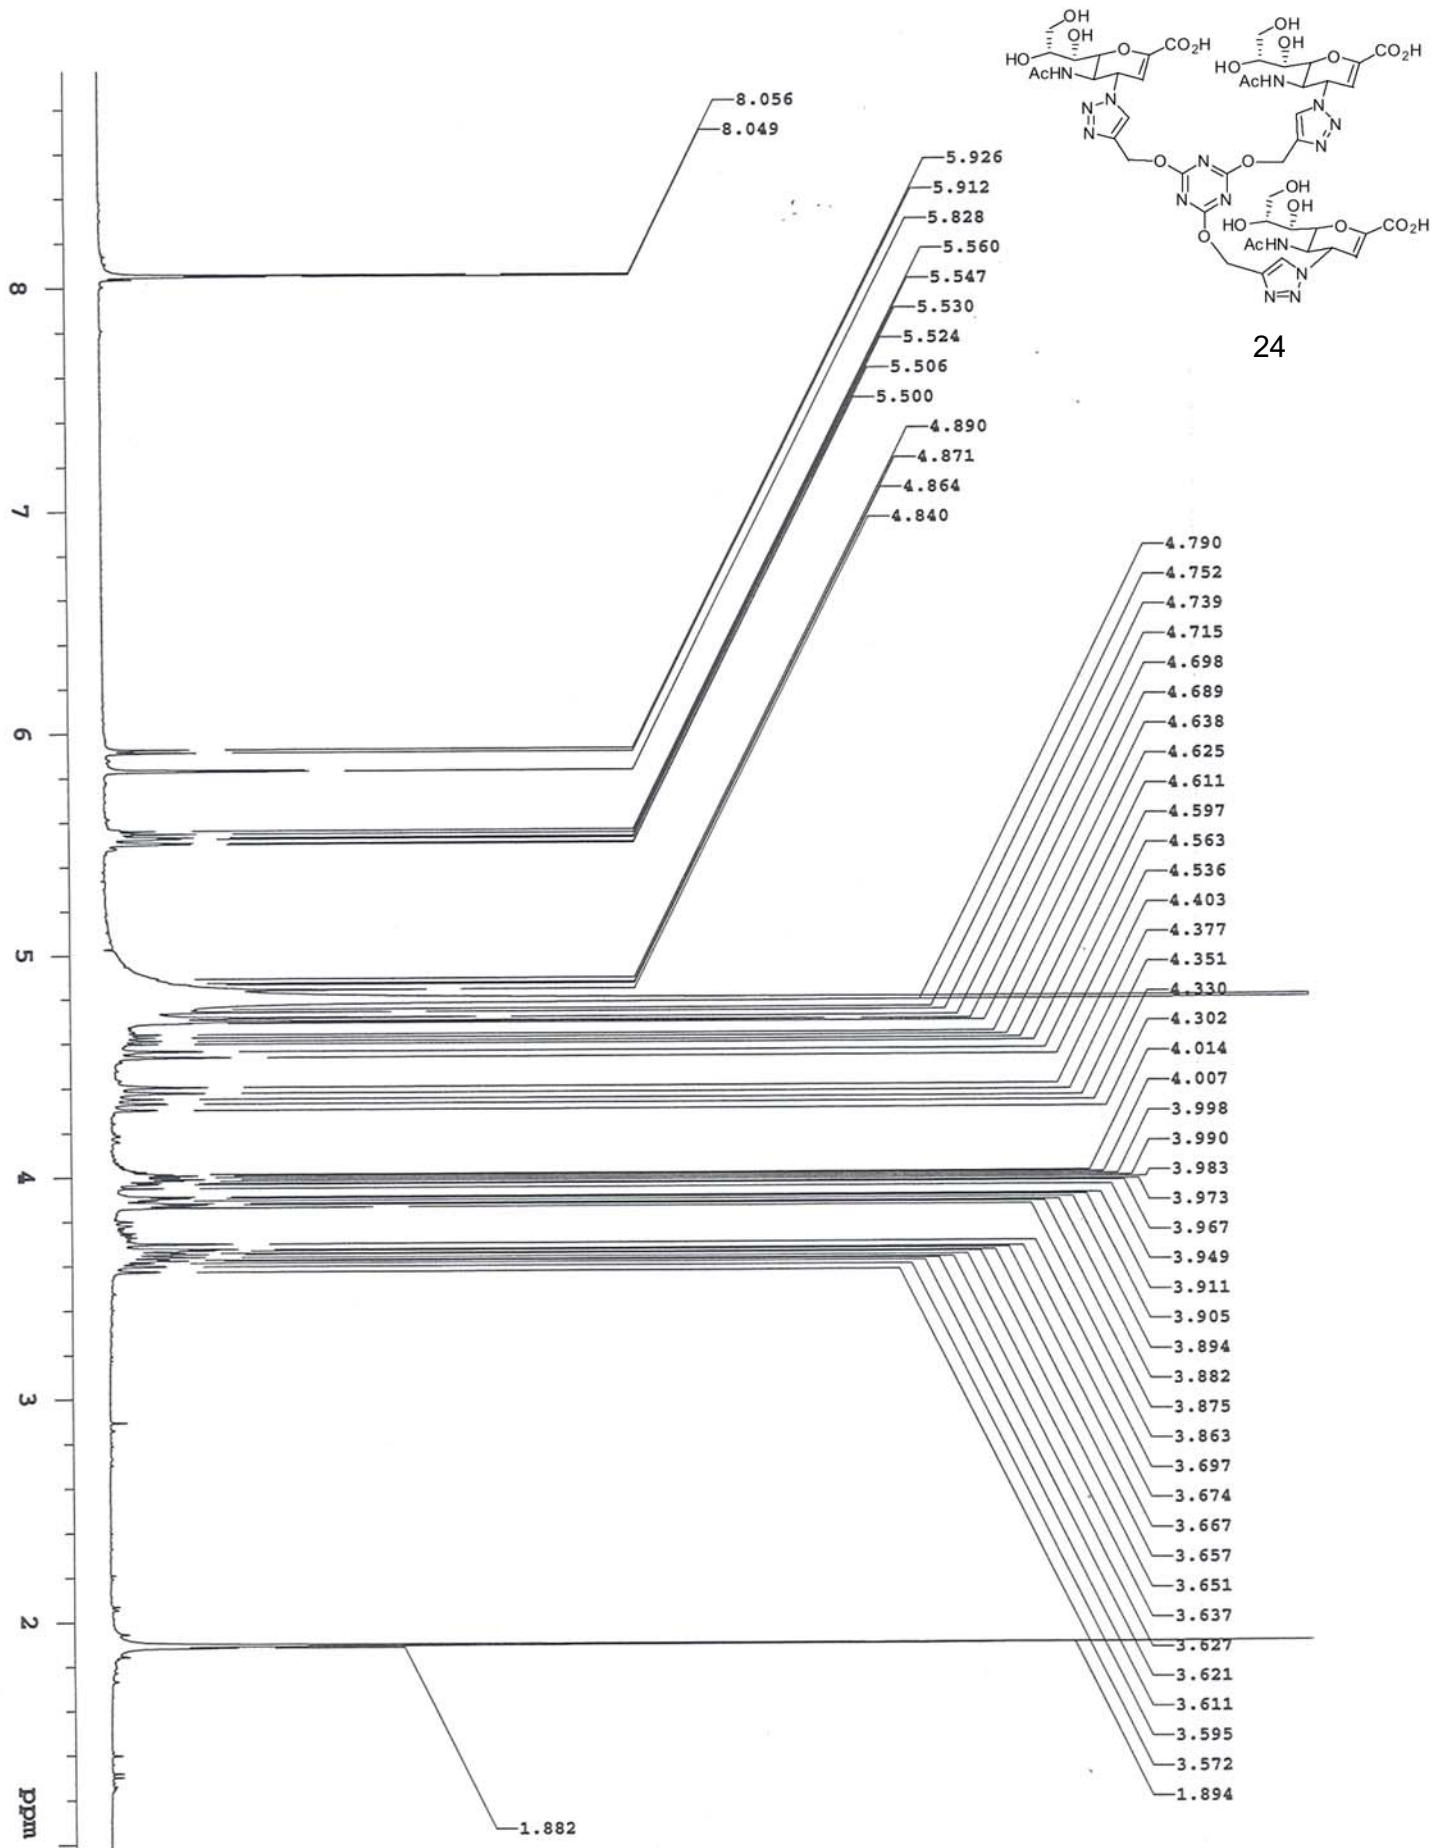

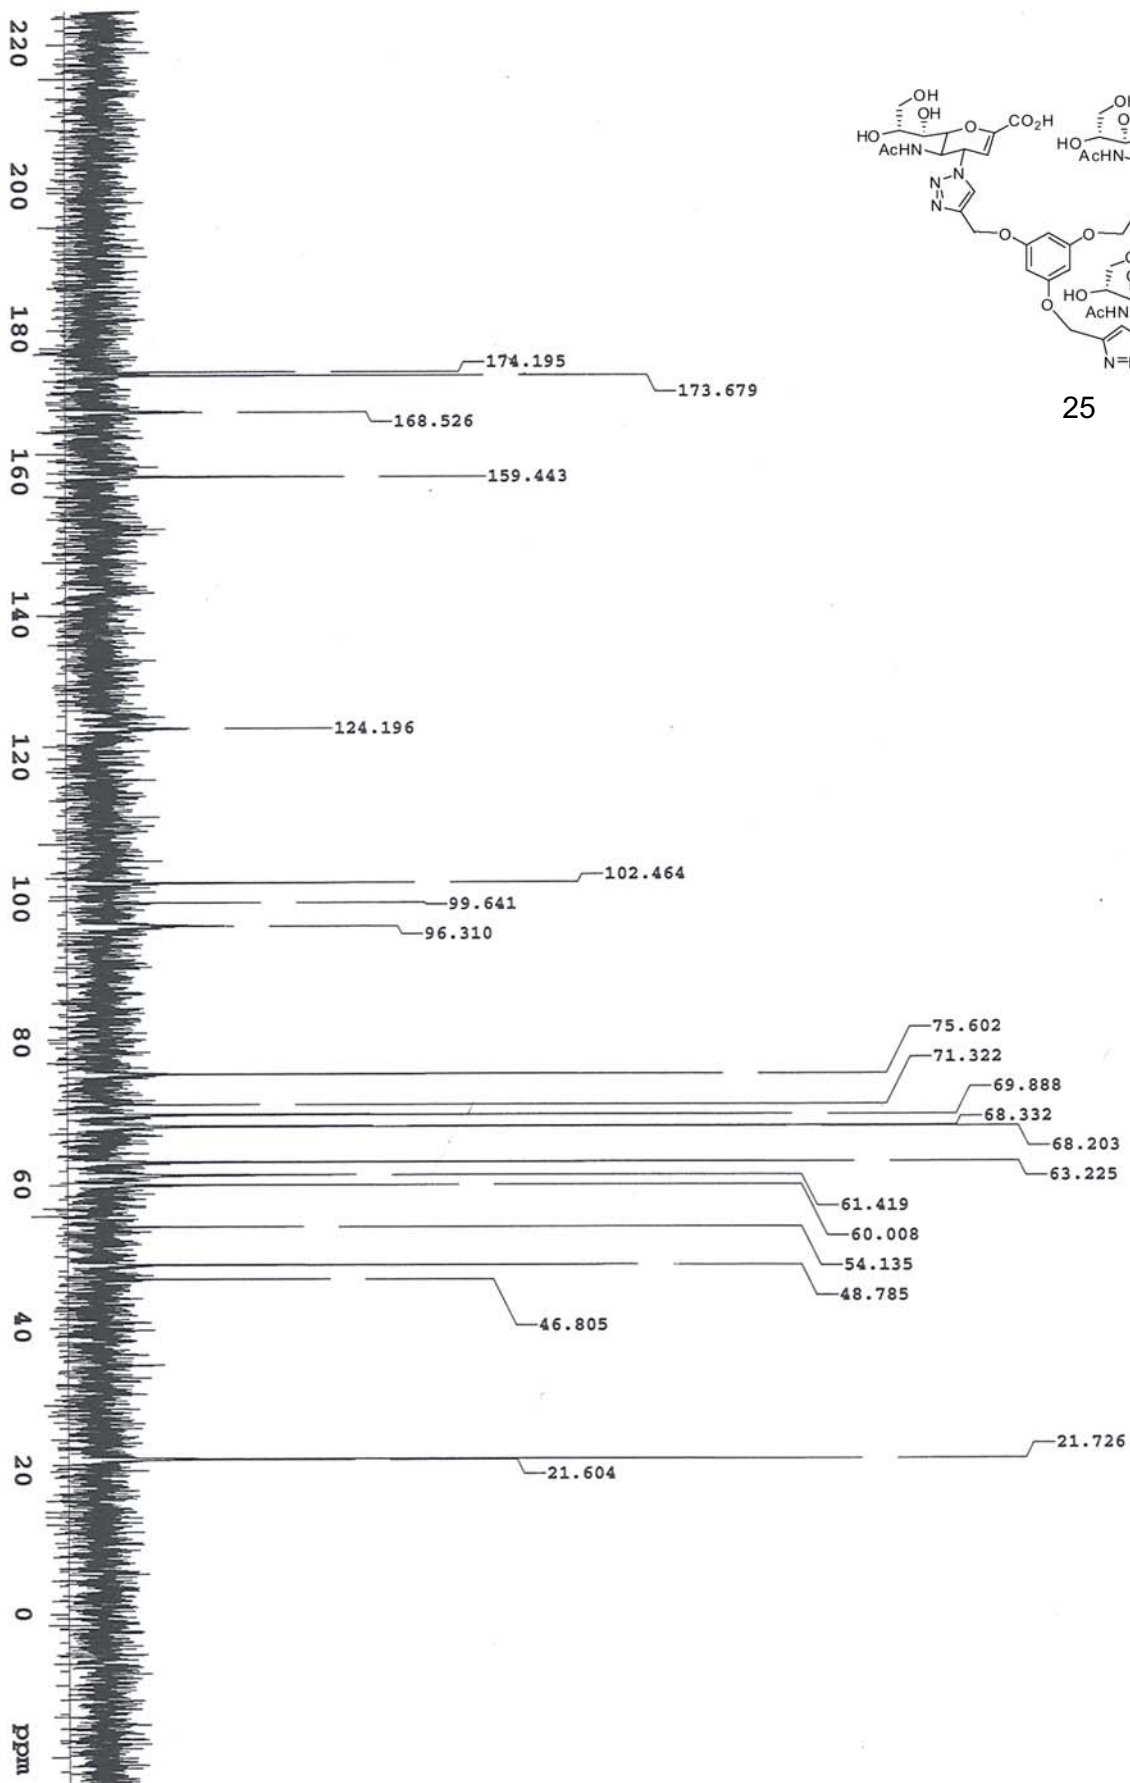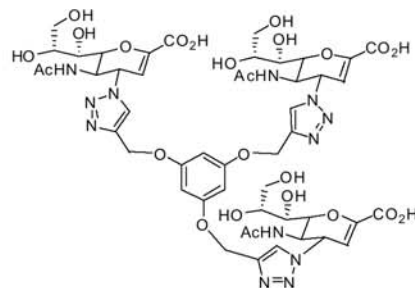

25

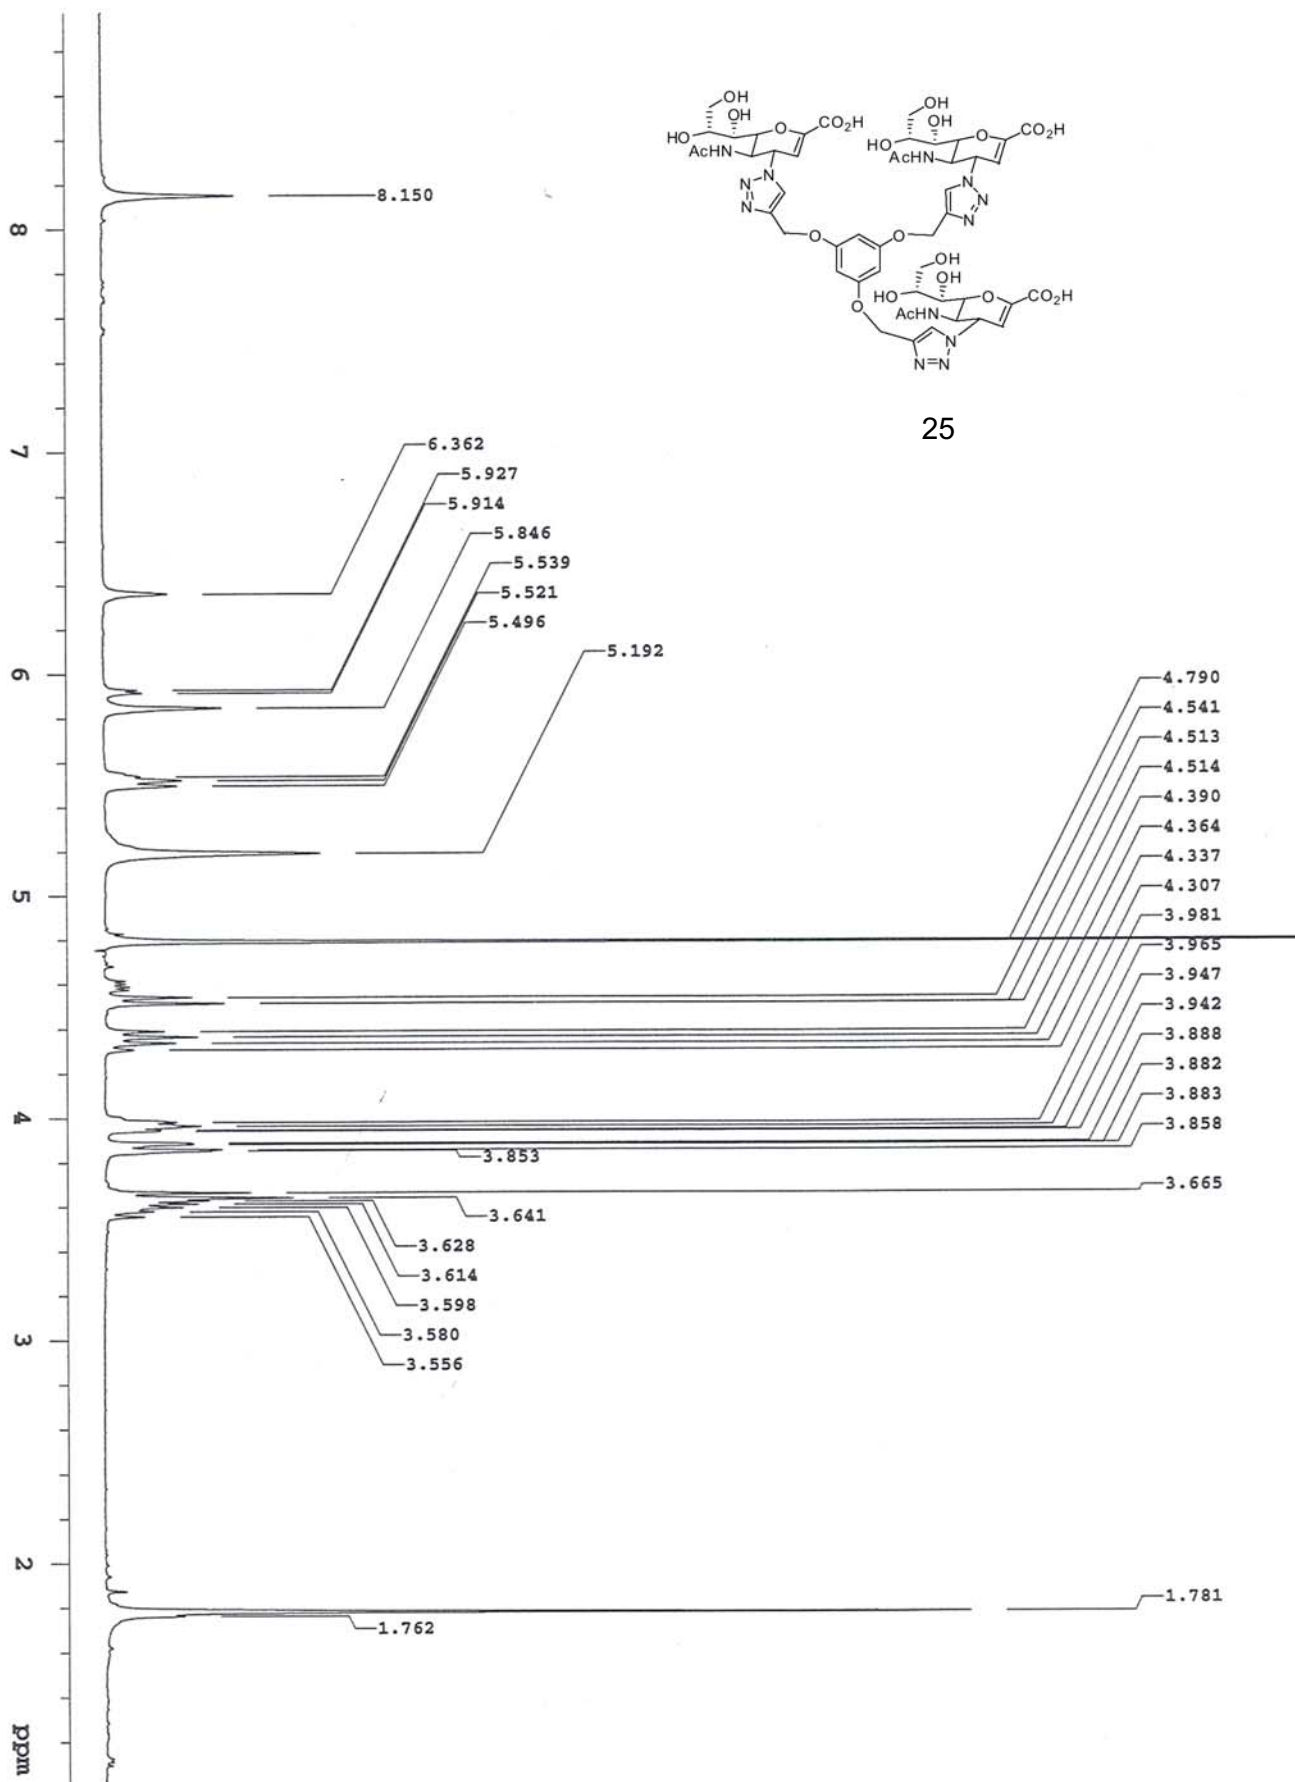

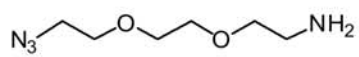

2-[2-(2-Azido-ethoxy)-ethoxy]-ethylamine

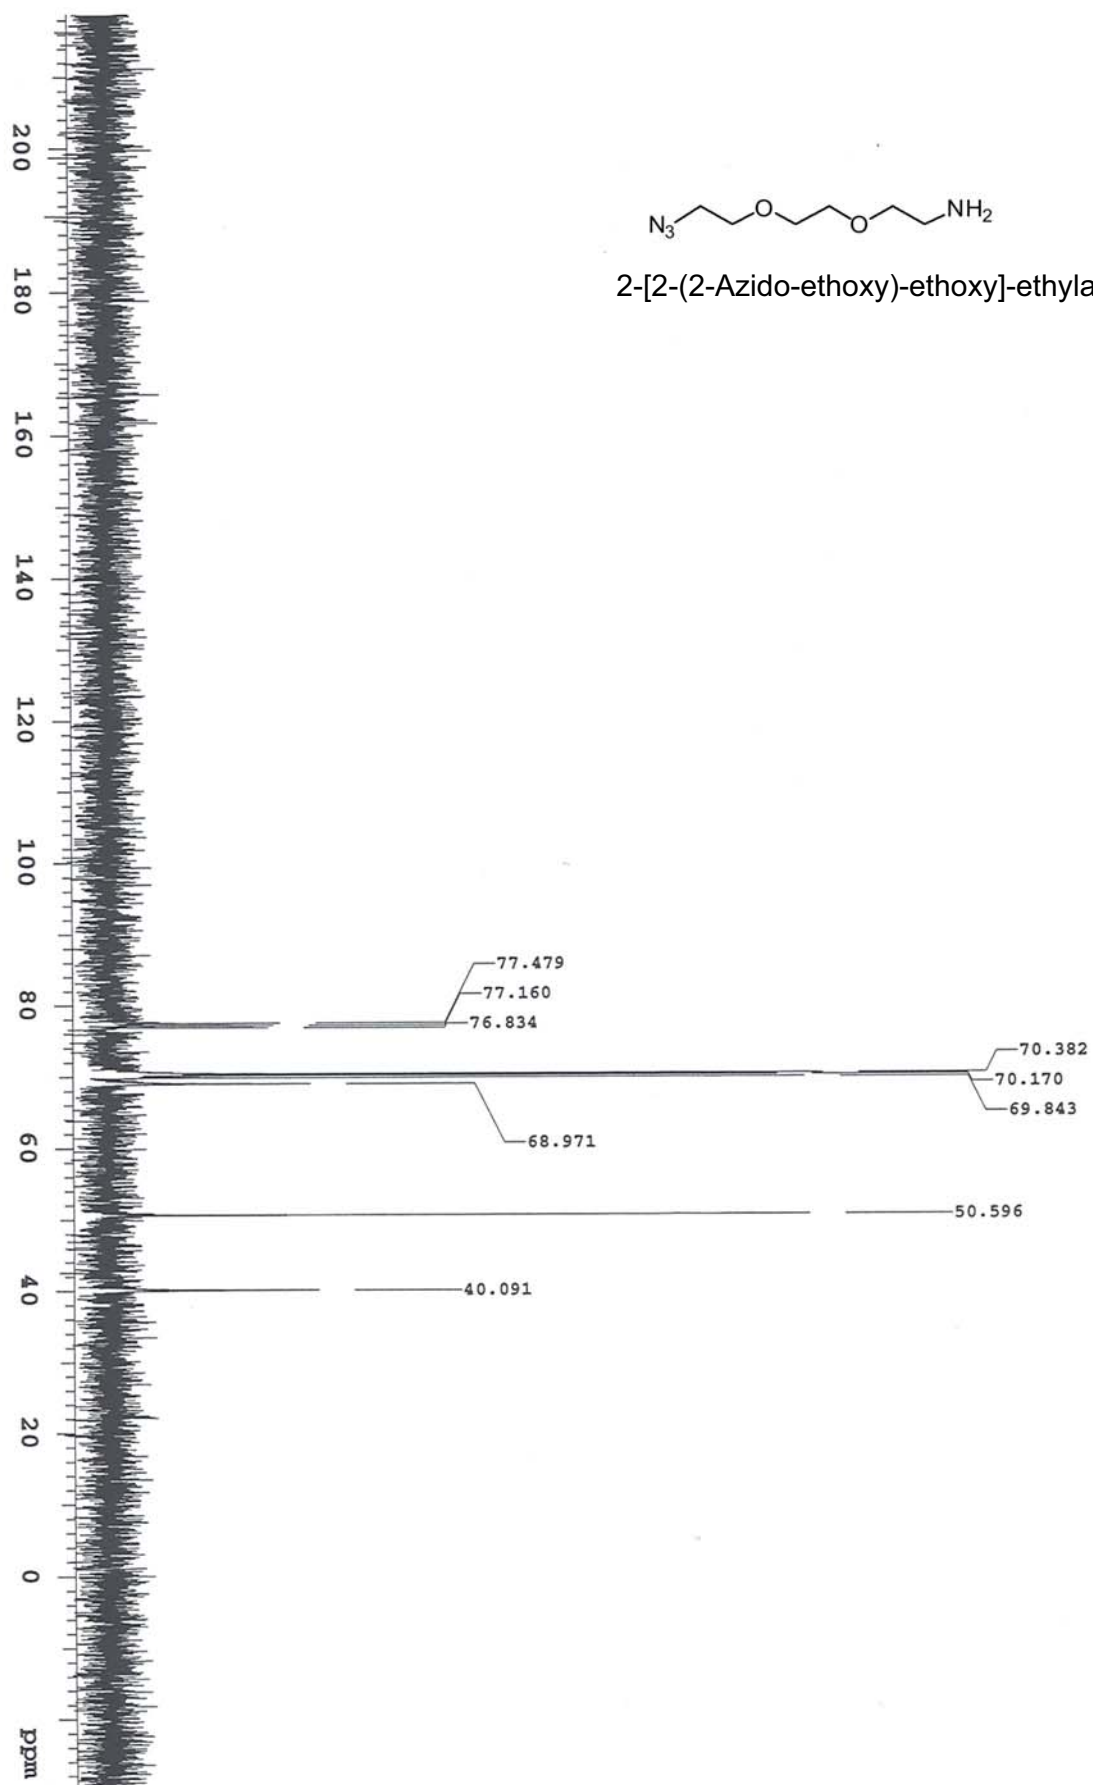

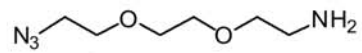

2-[2-(2-Azido-ethoxy)-ethoxy]-ethylamine

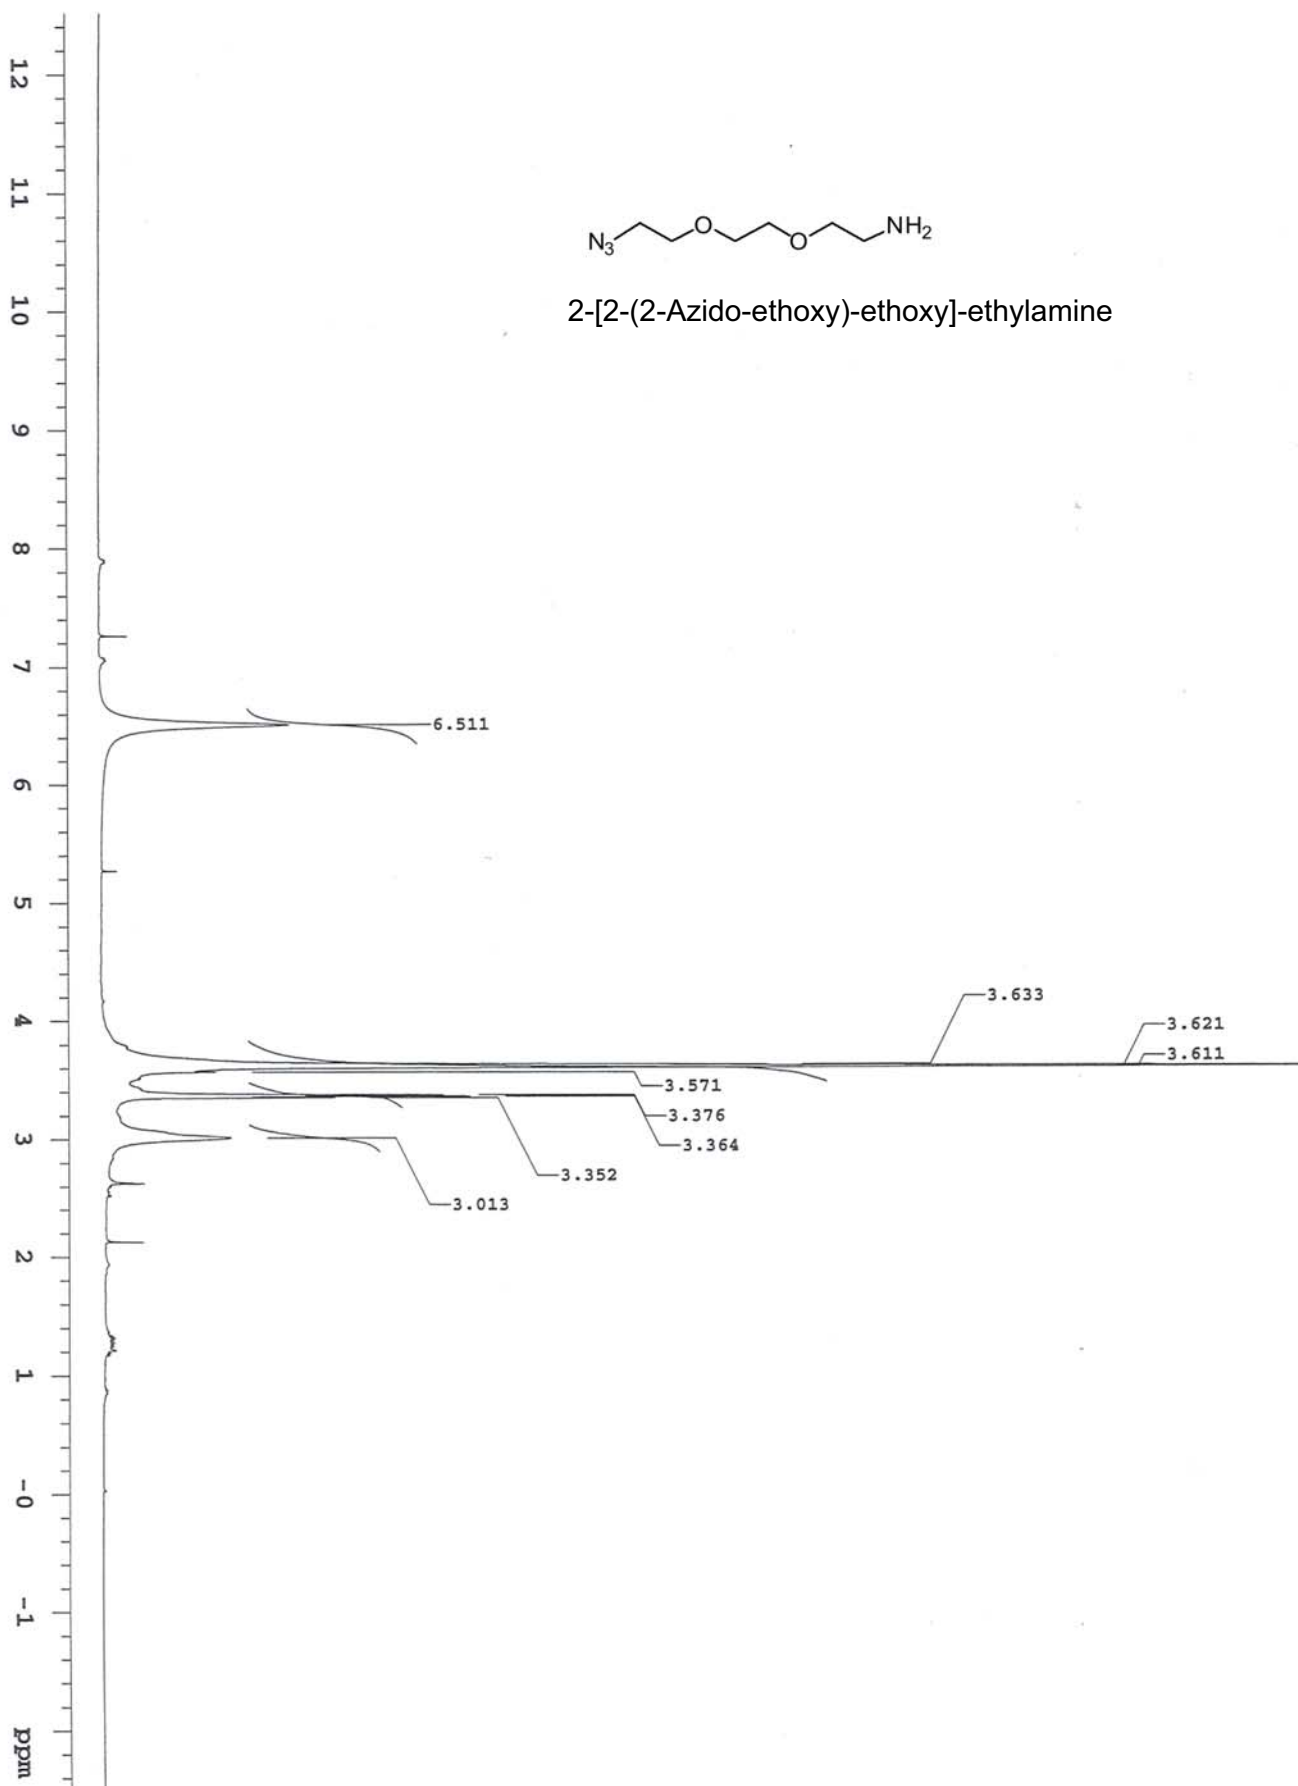



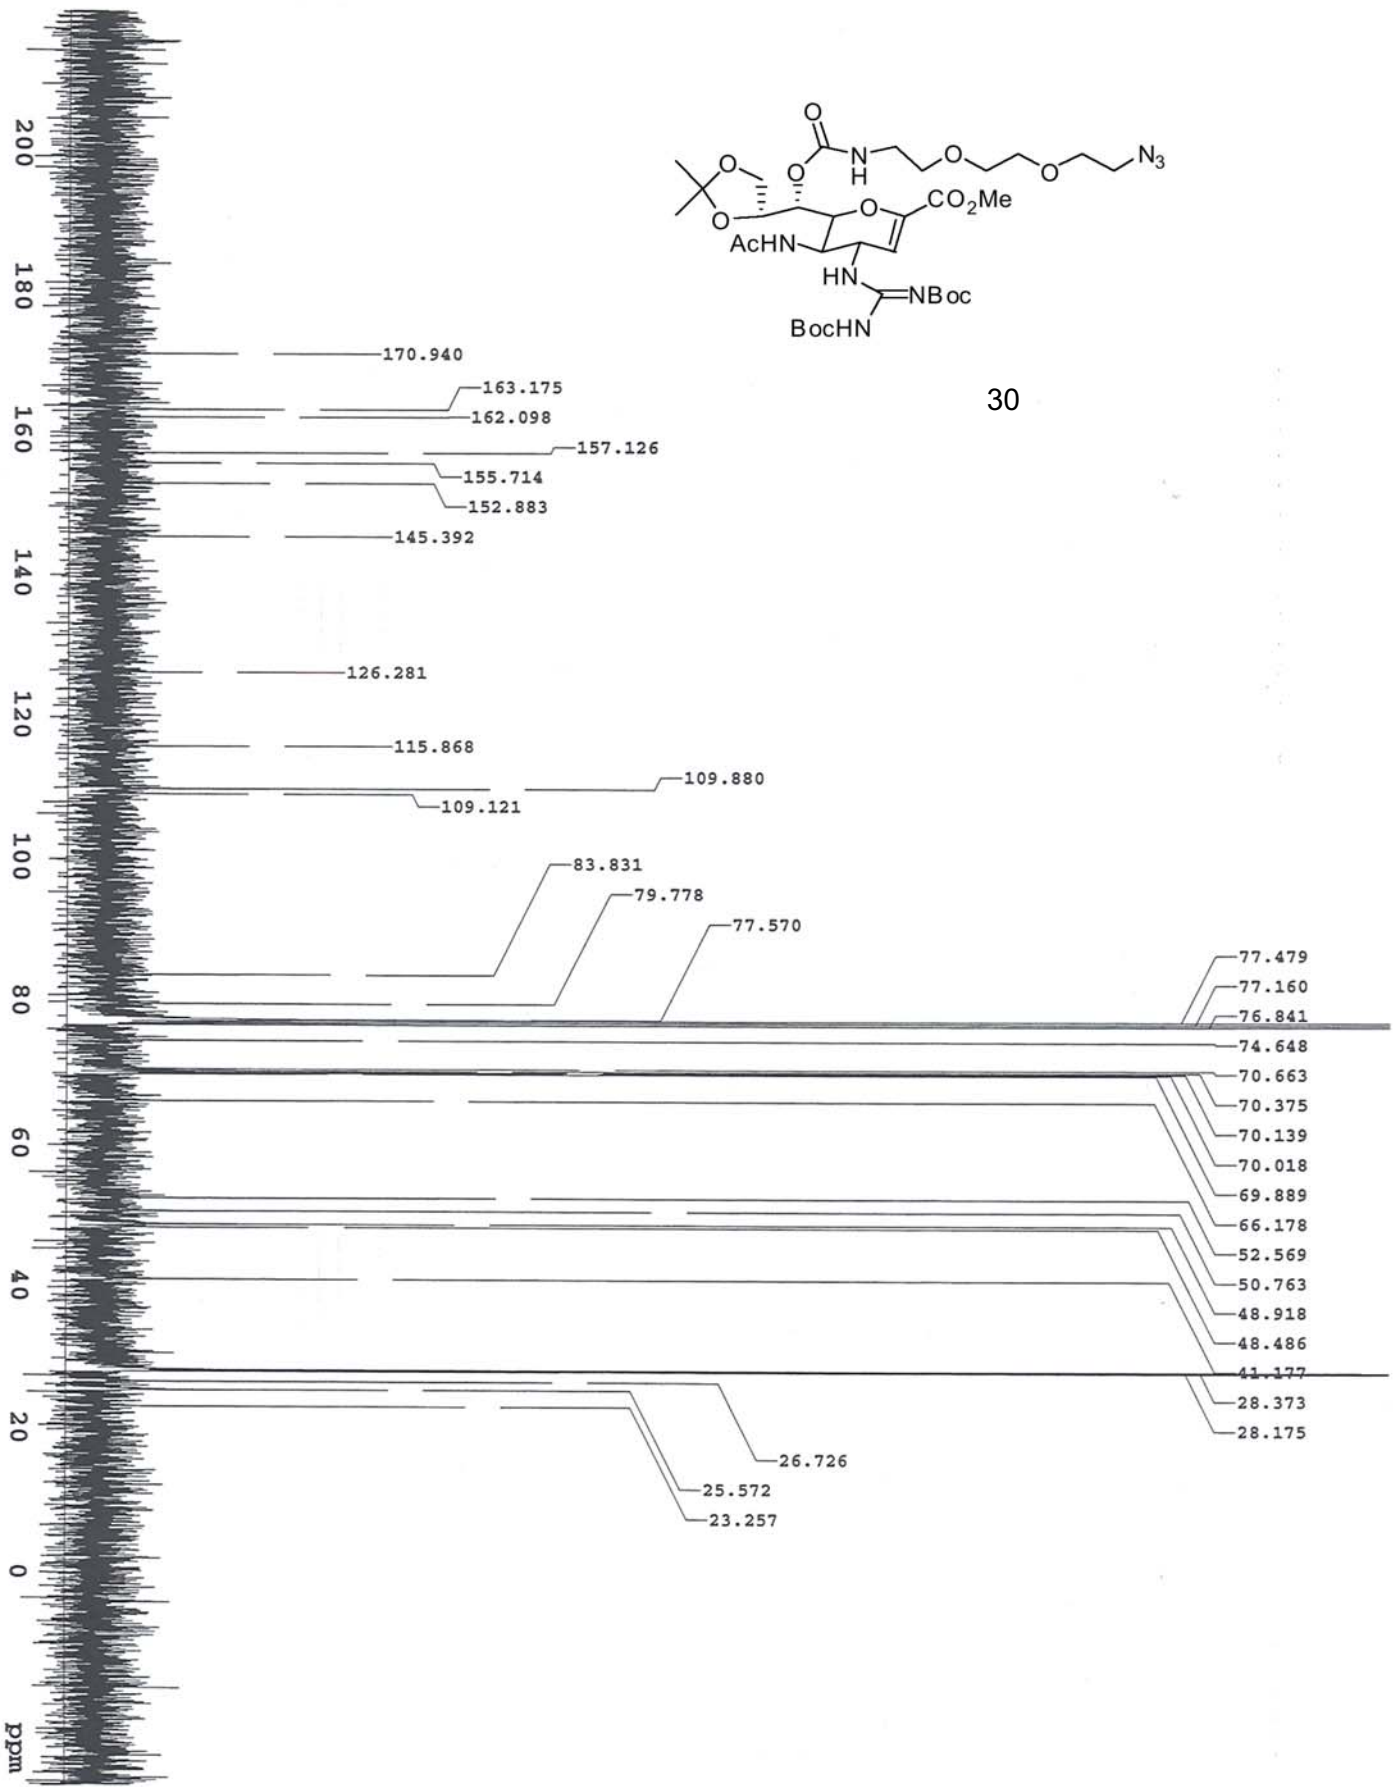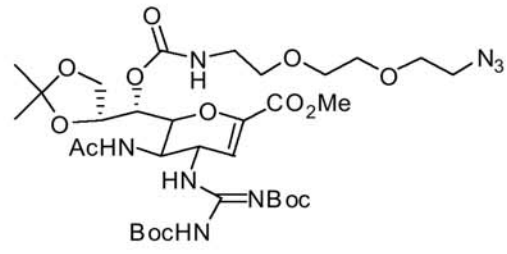

30

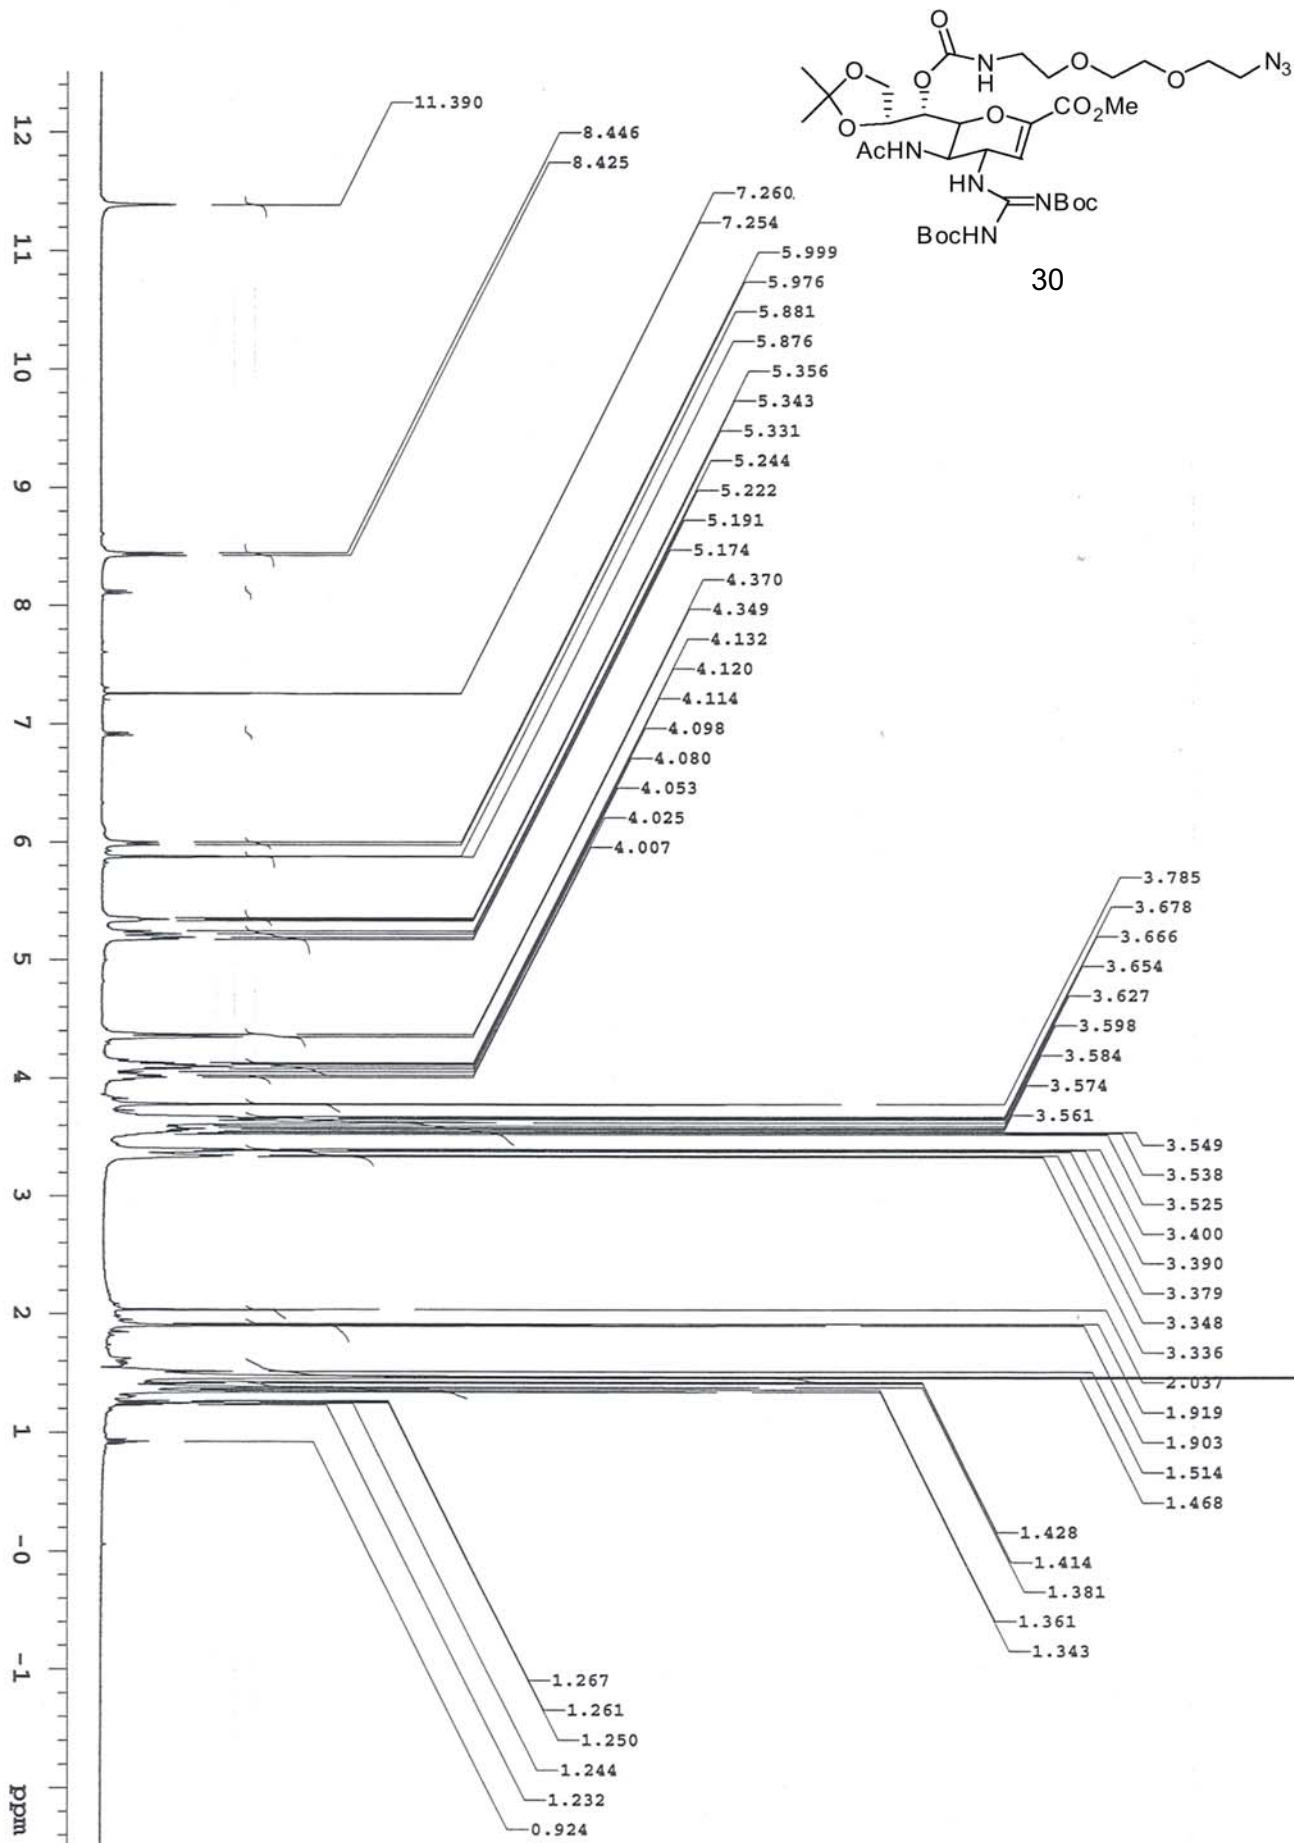

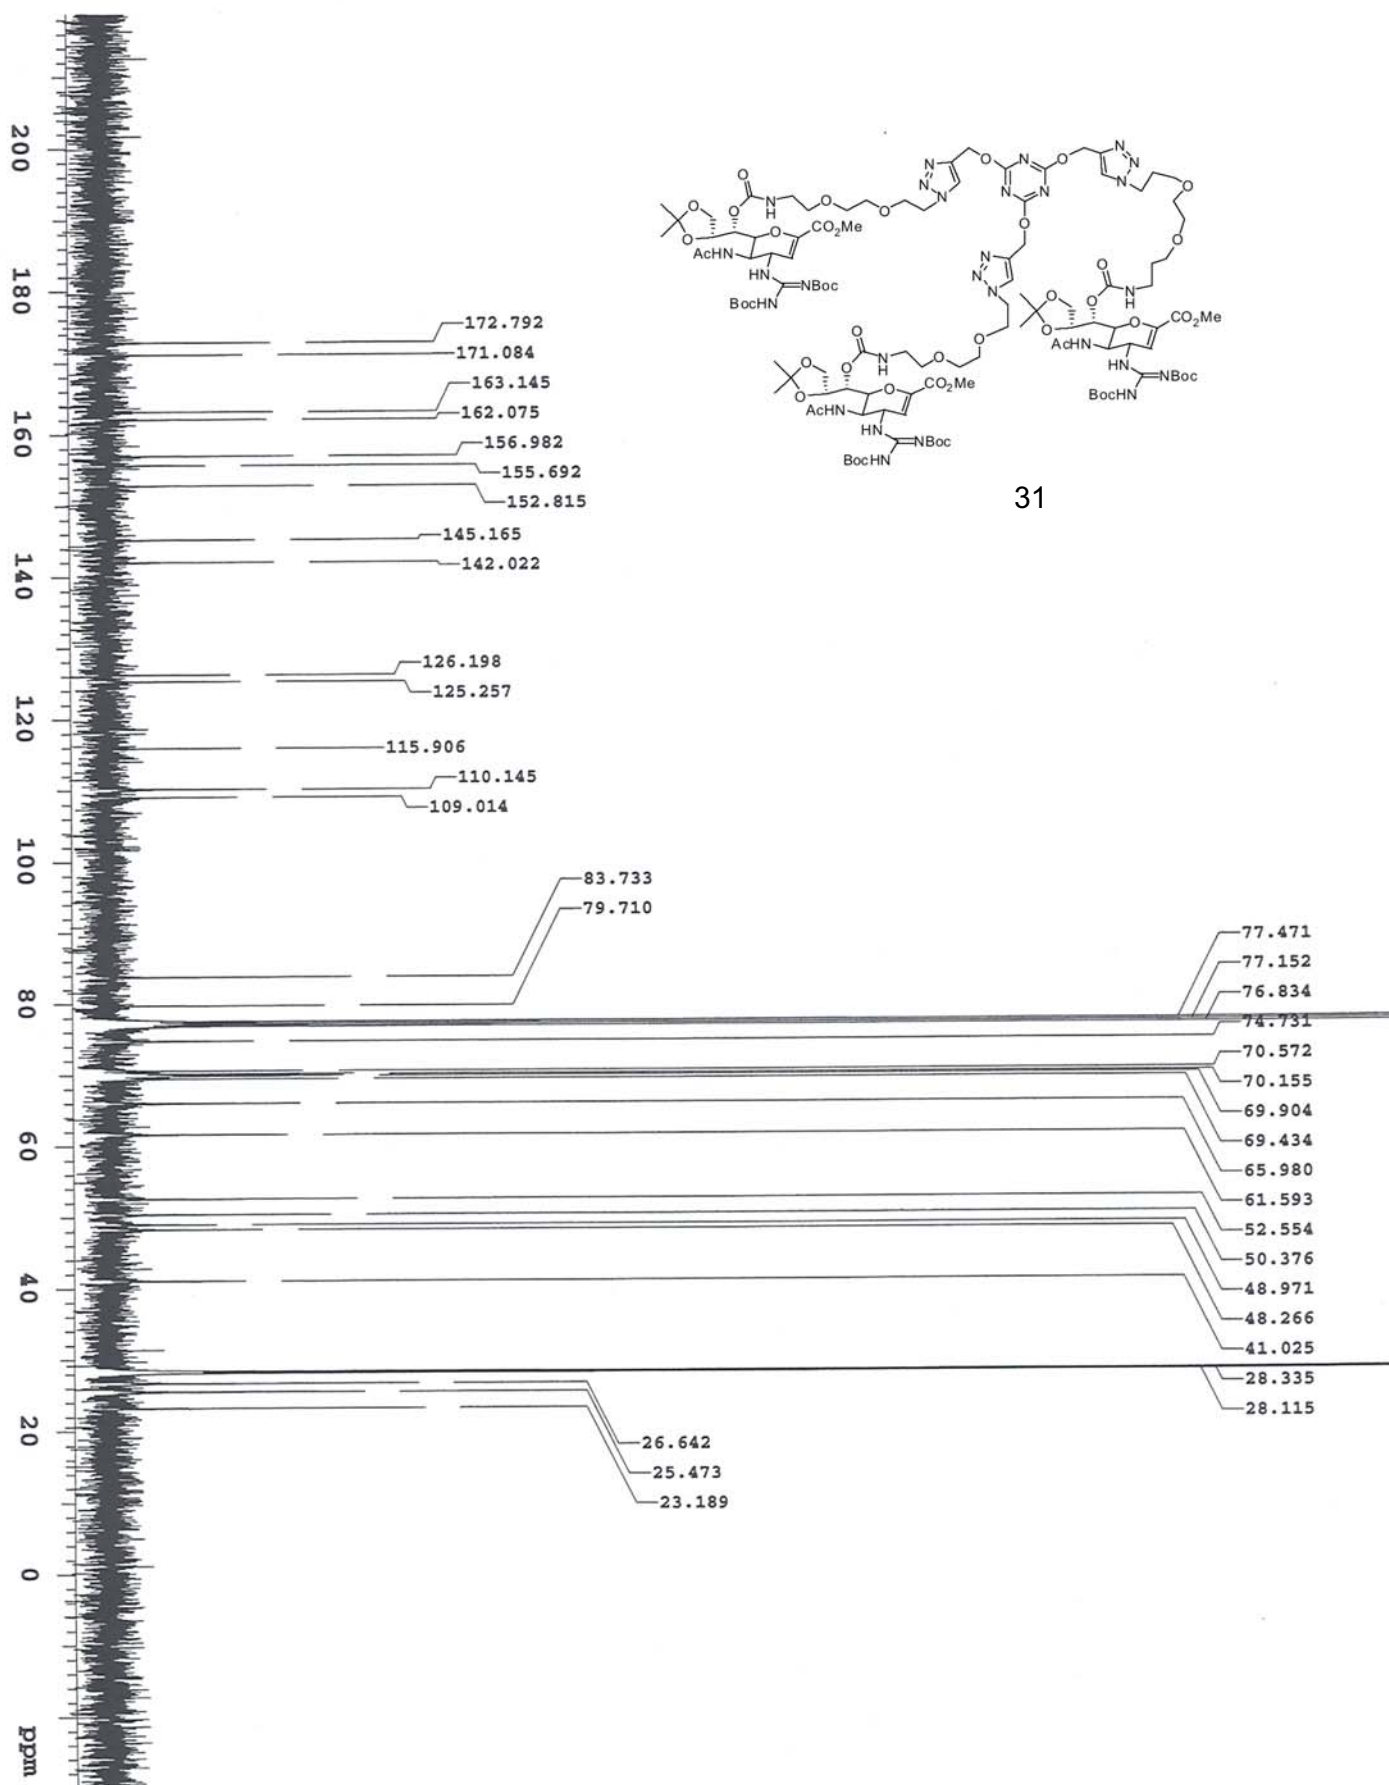

31

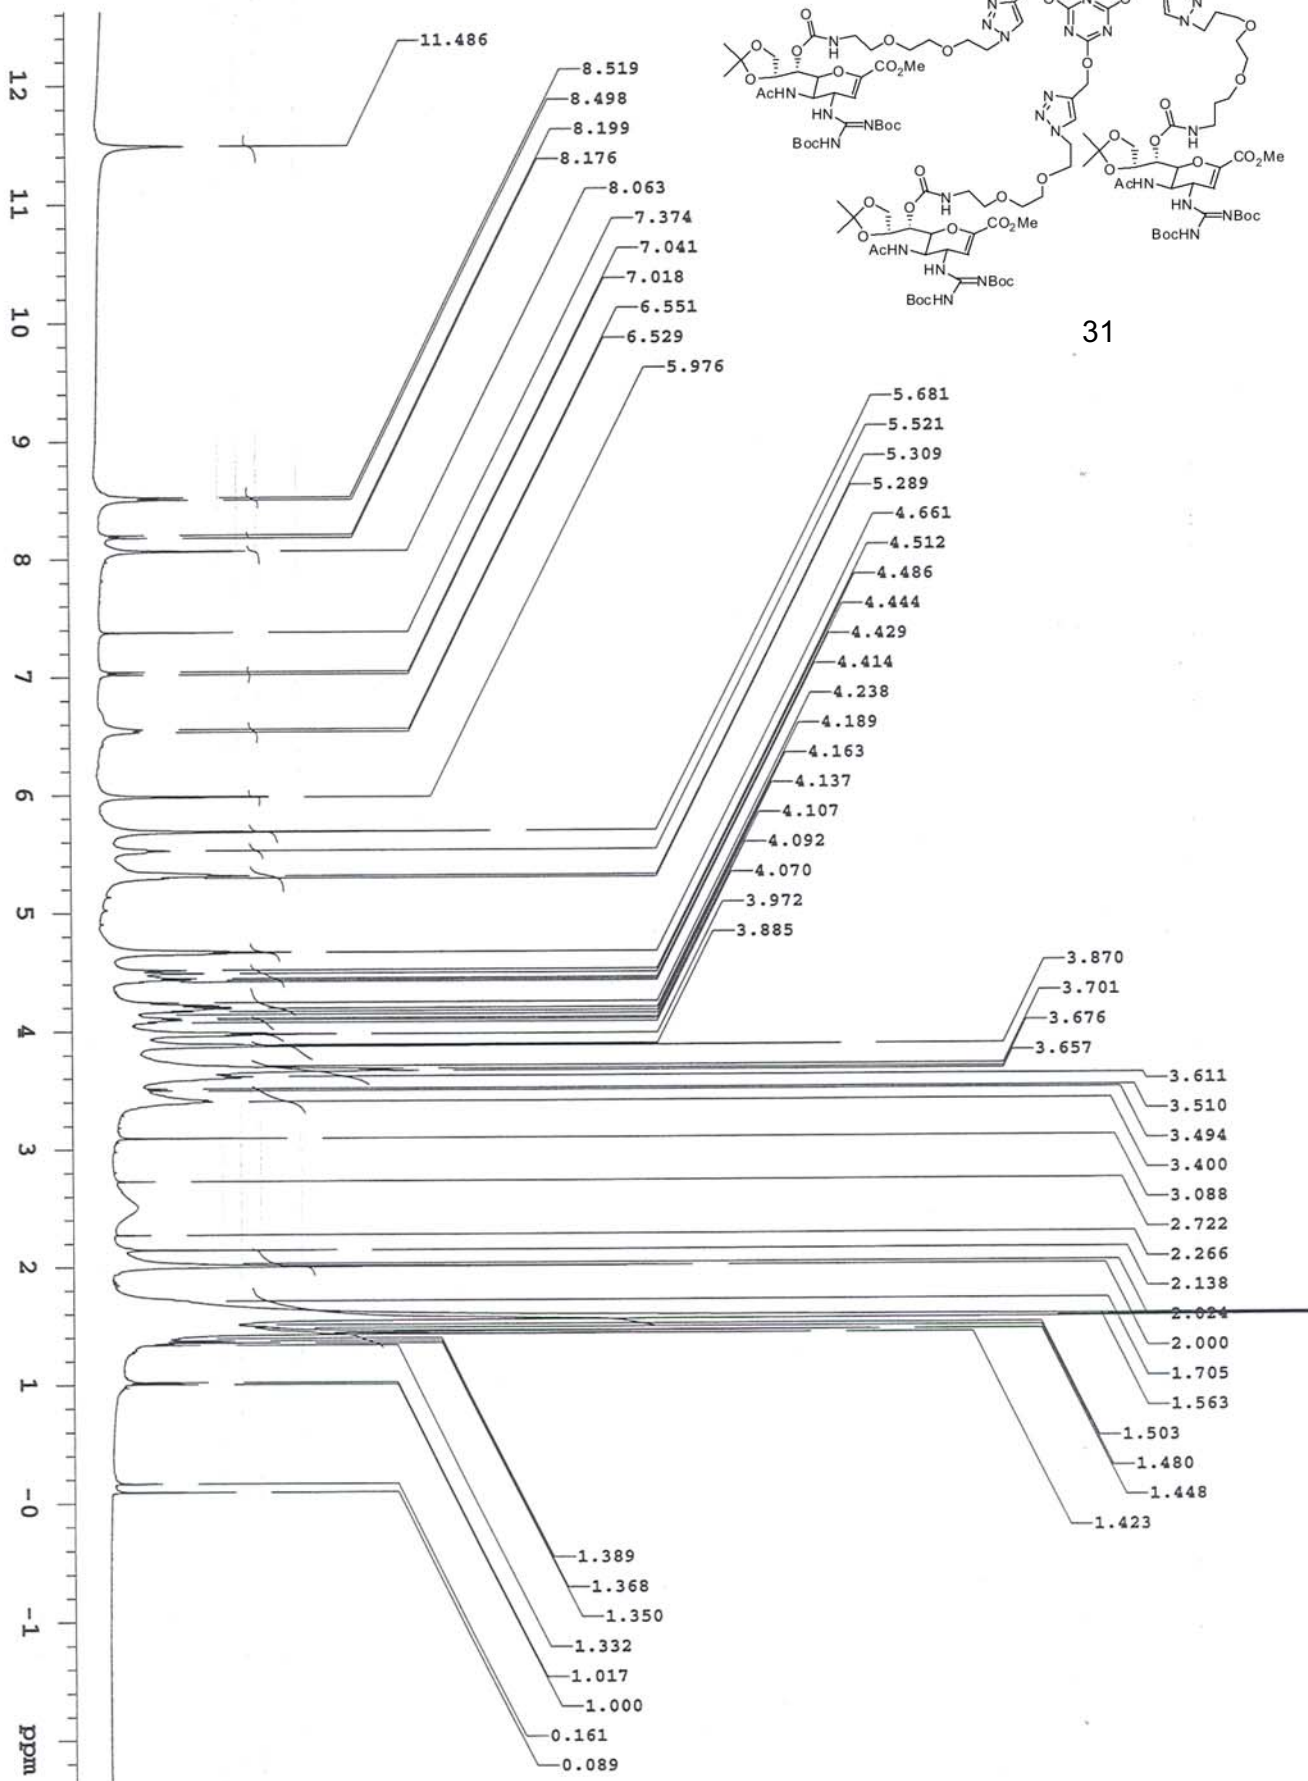

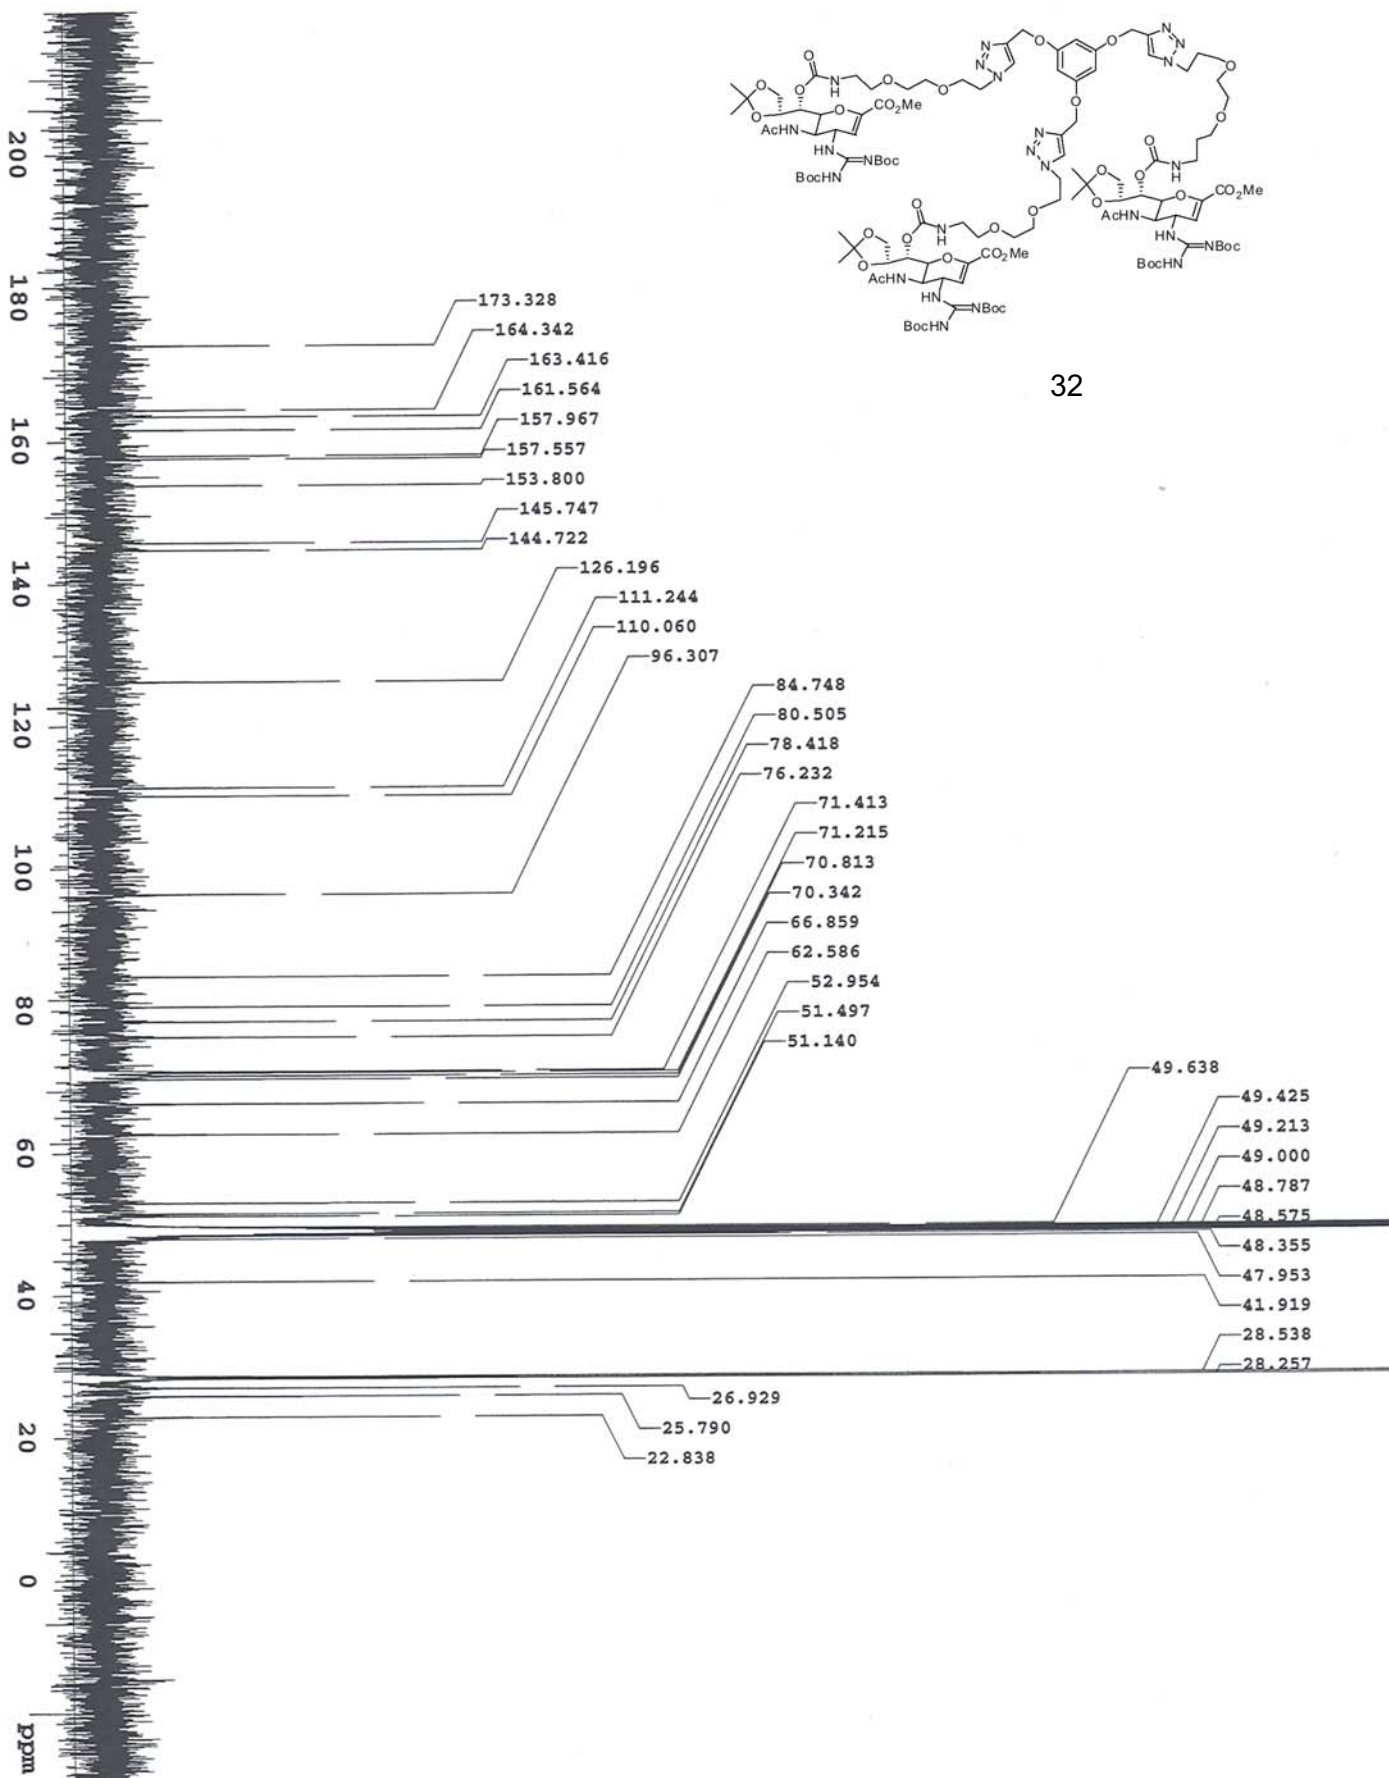

32

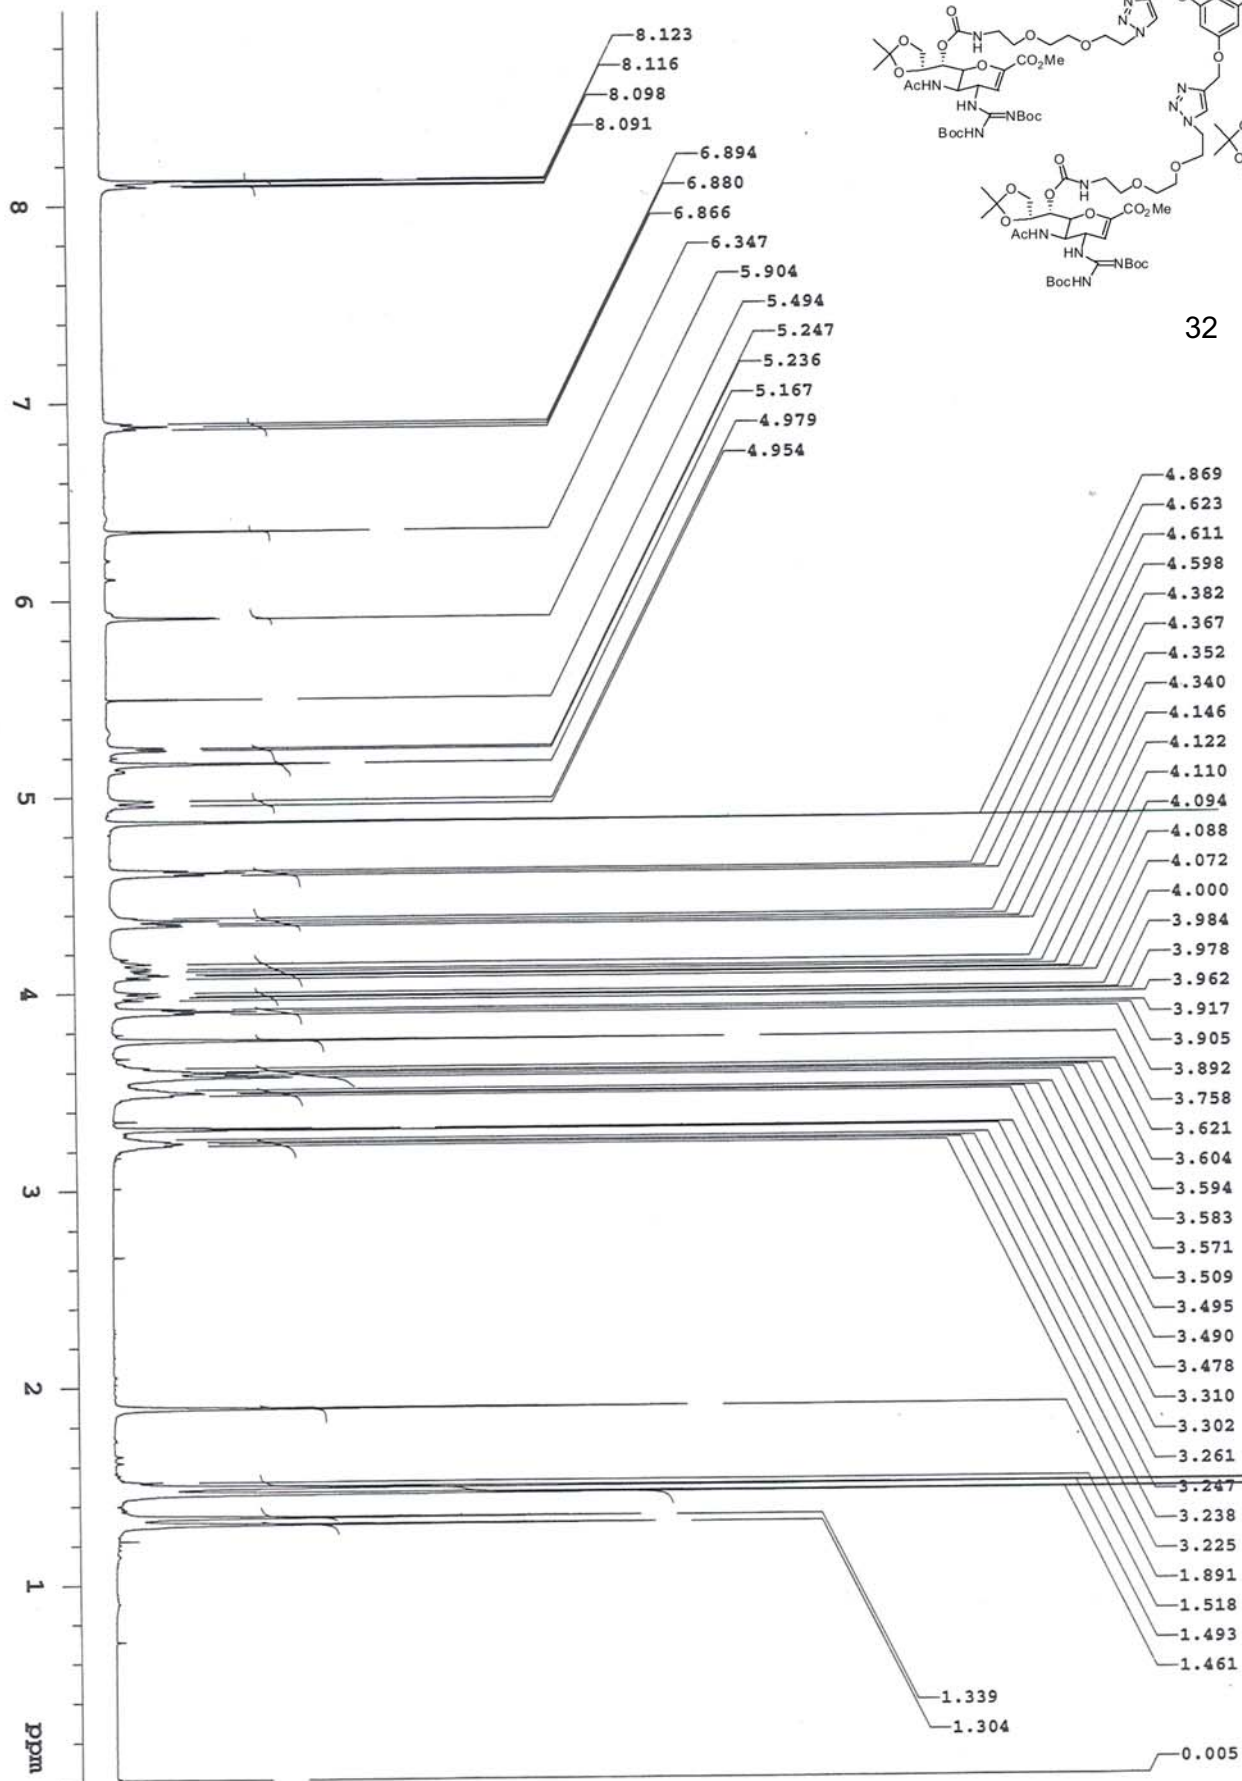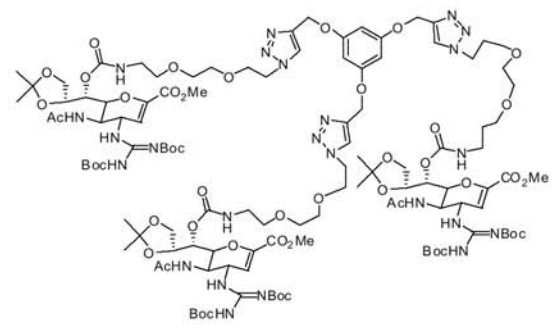

32

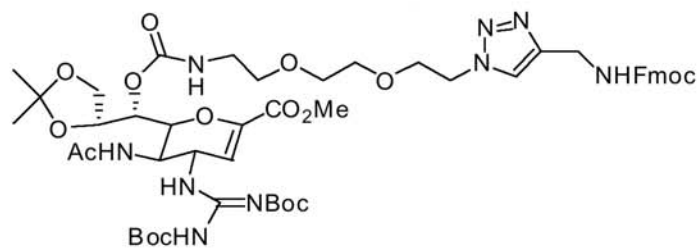

33

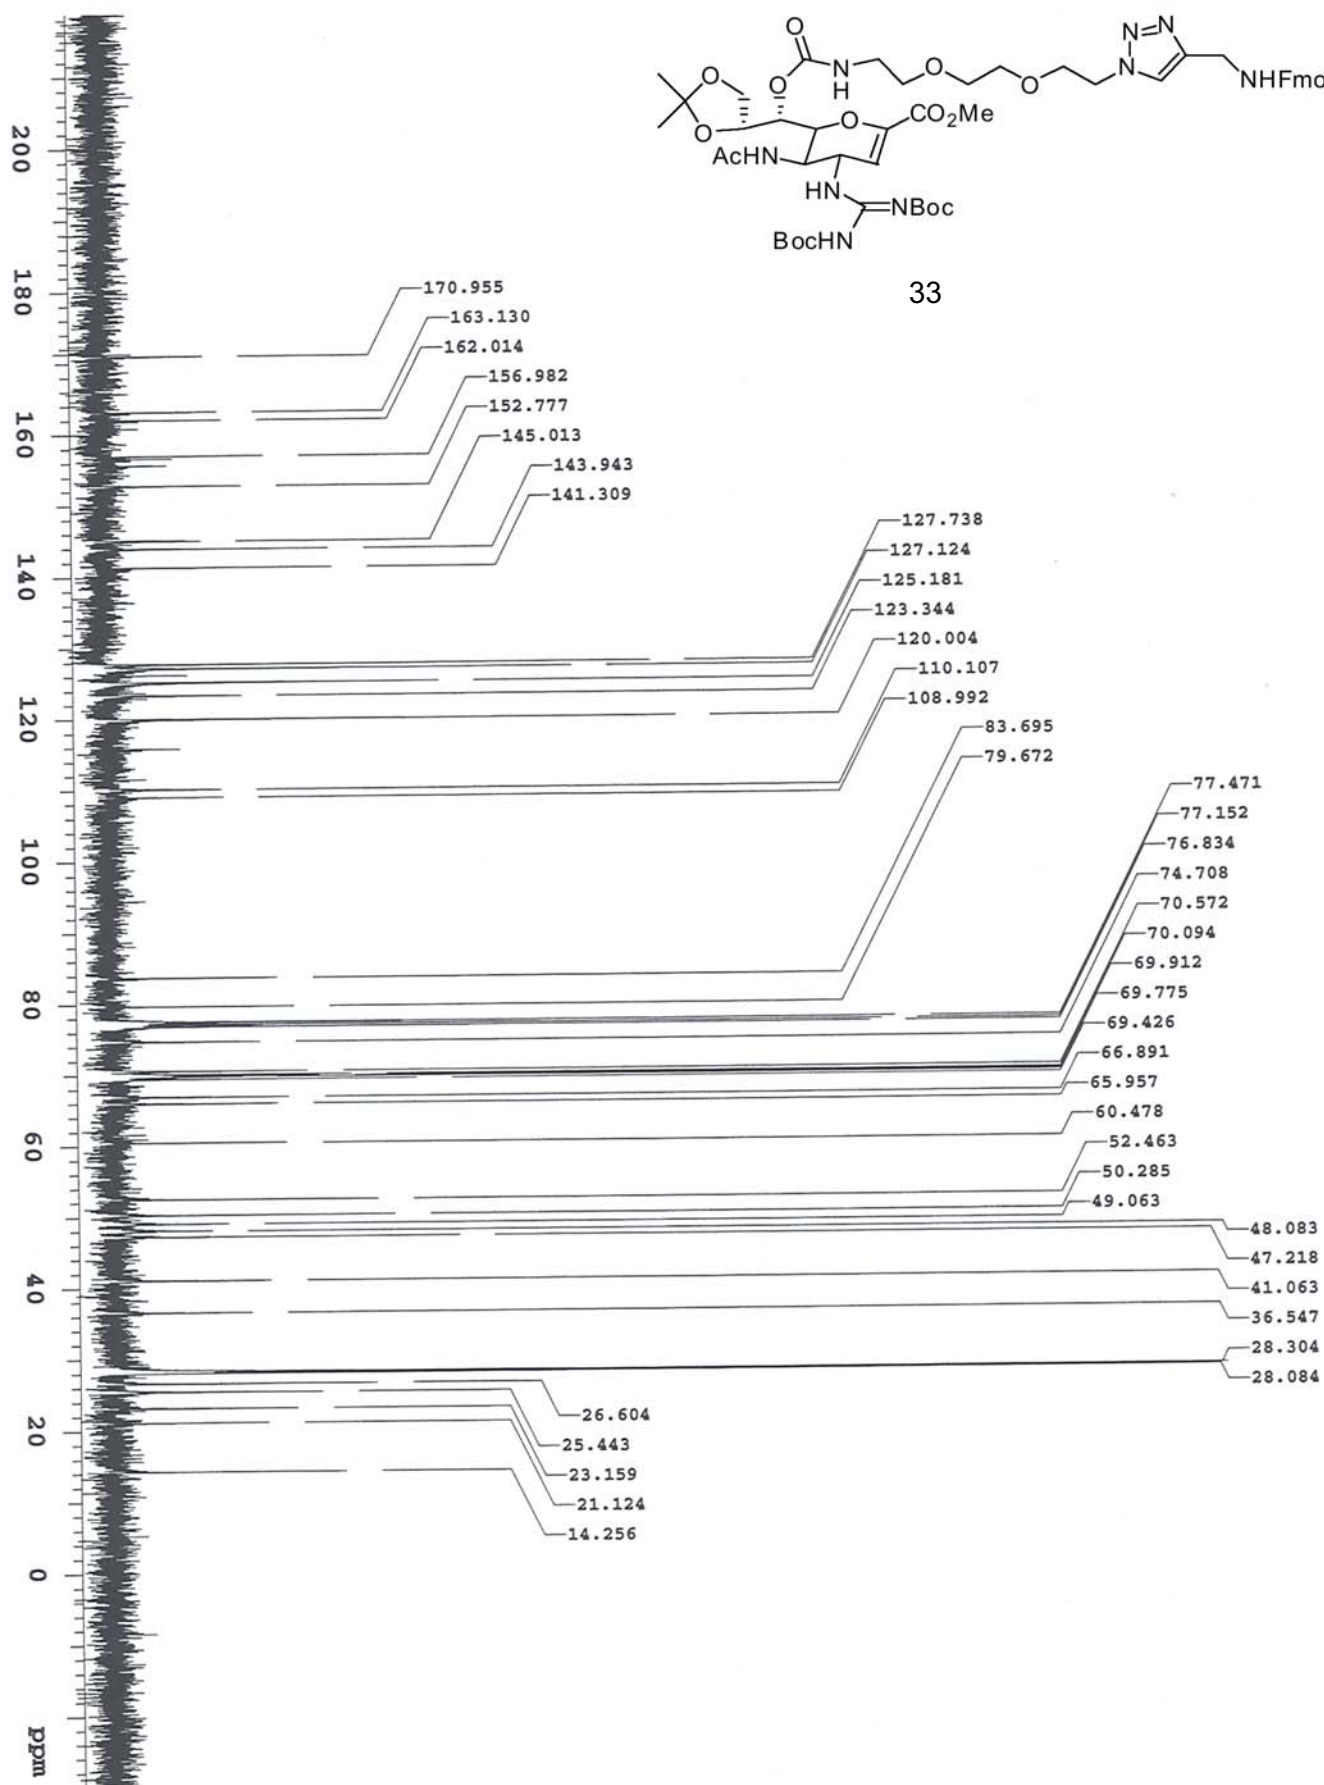

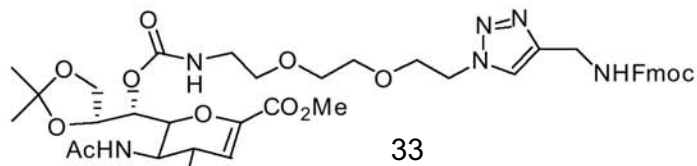

33

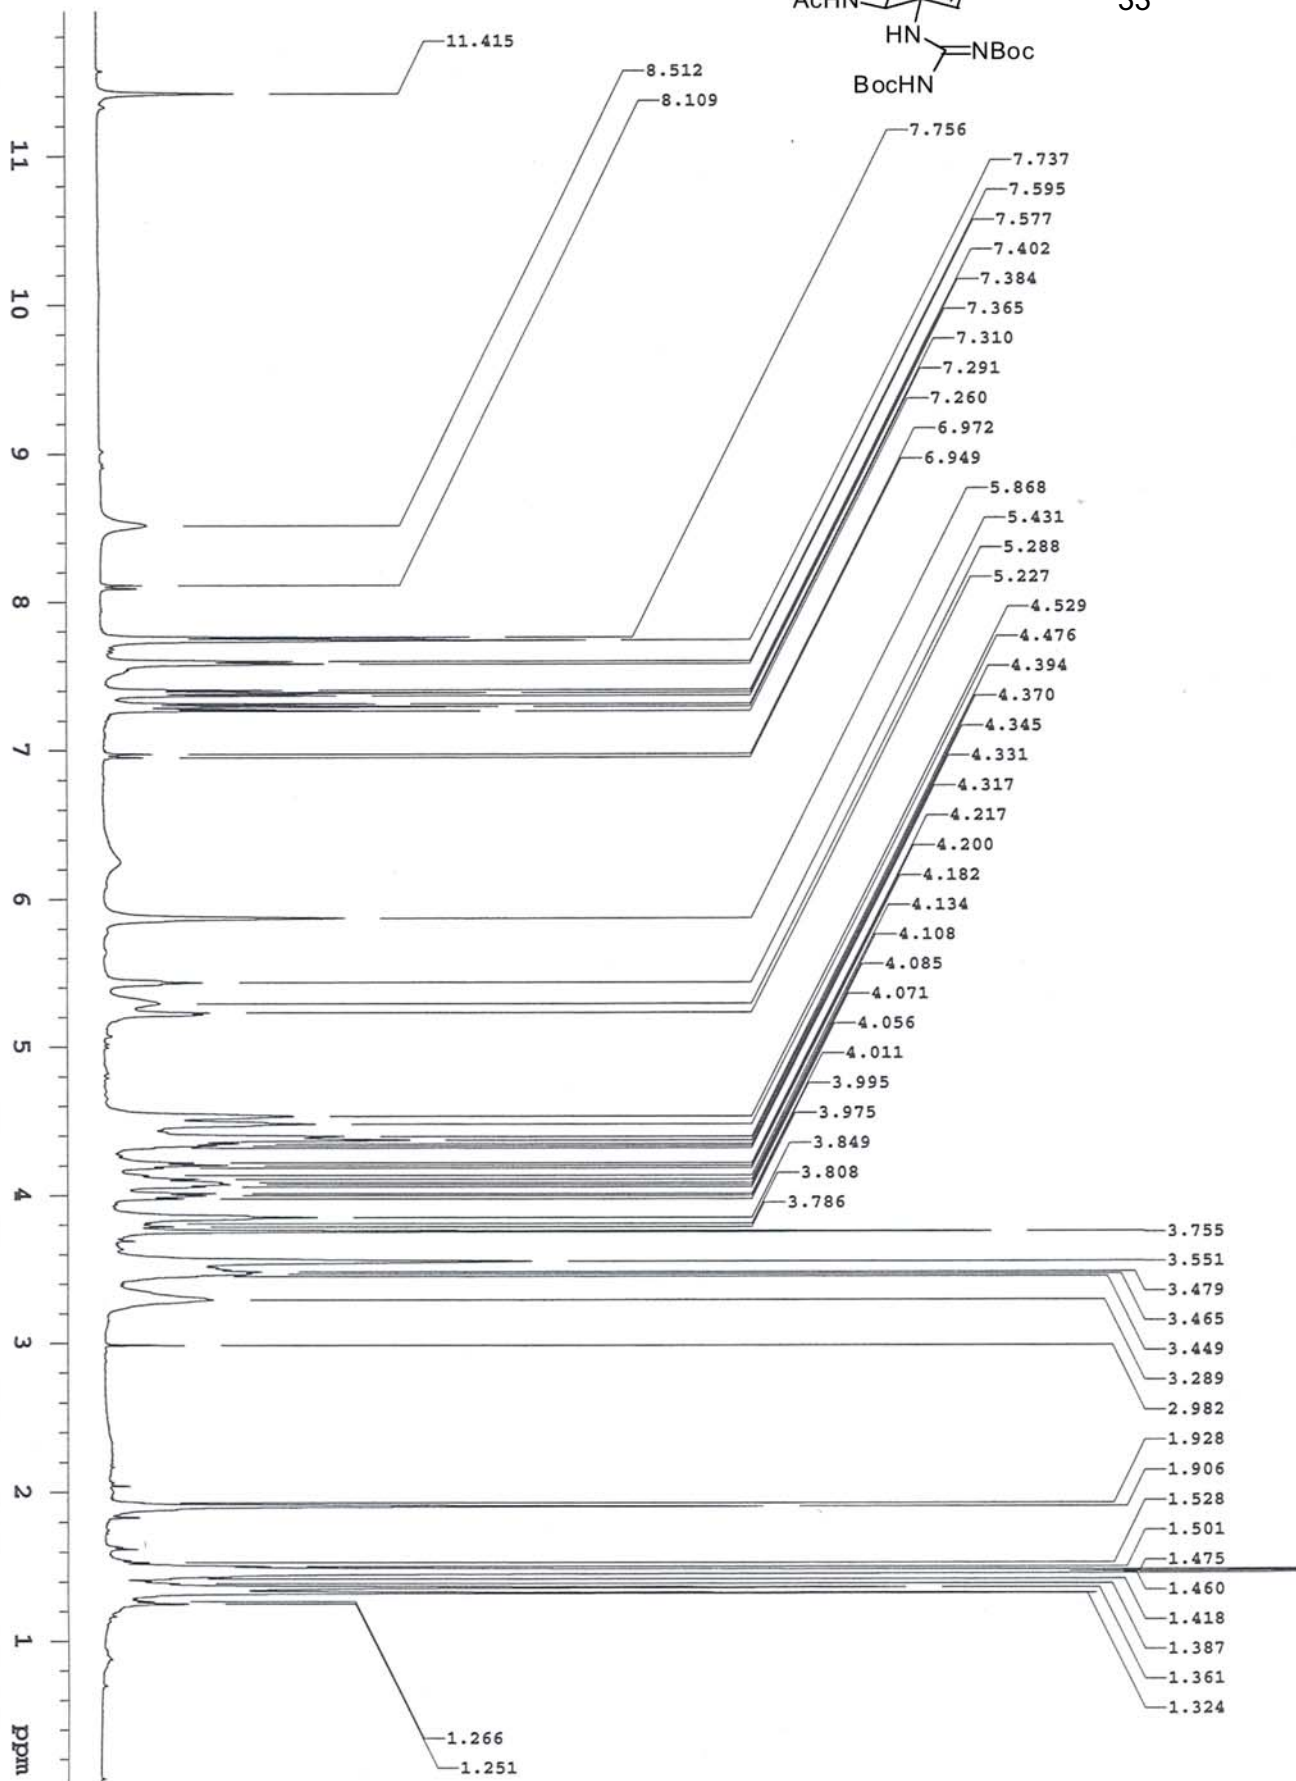



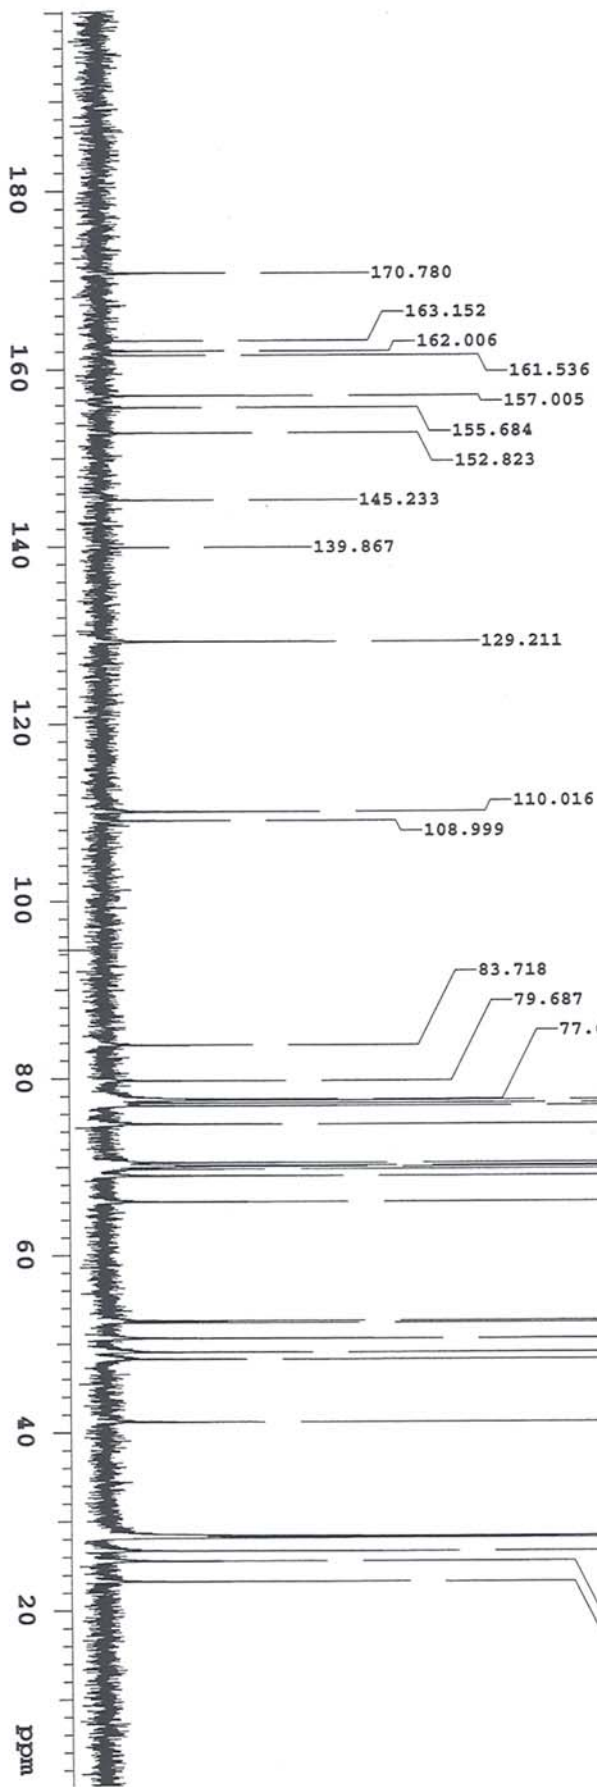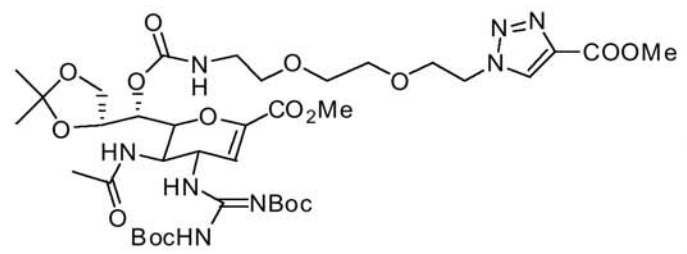

34

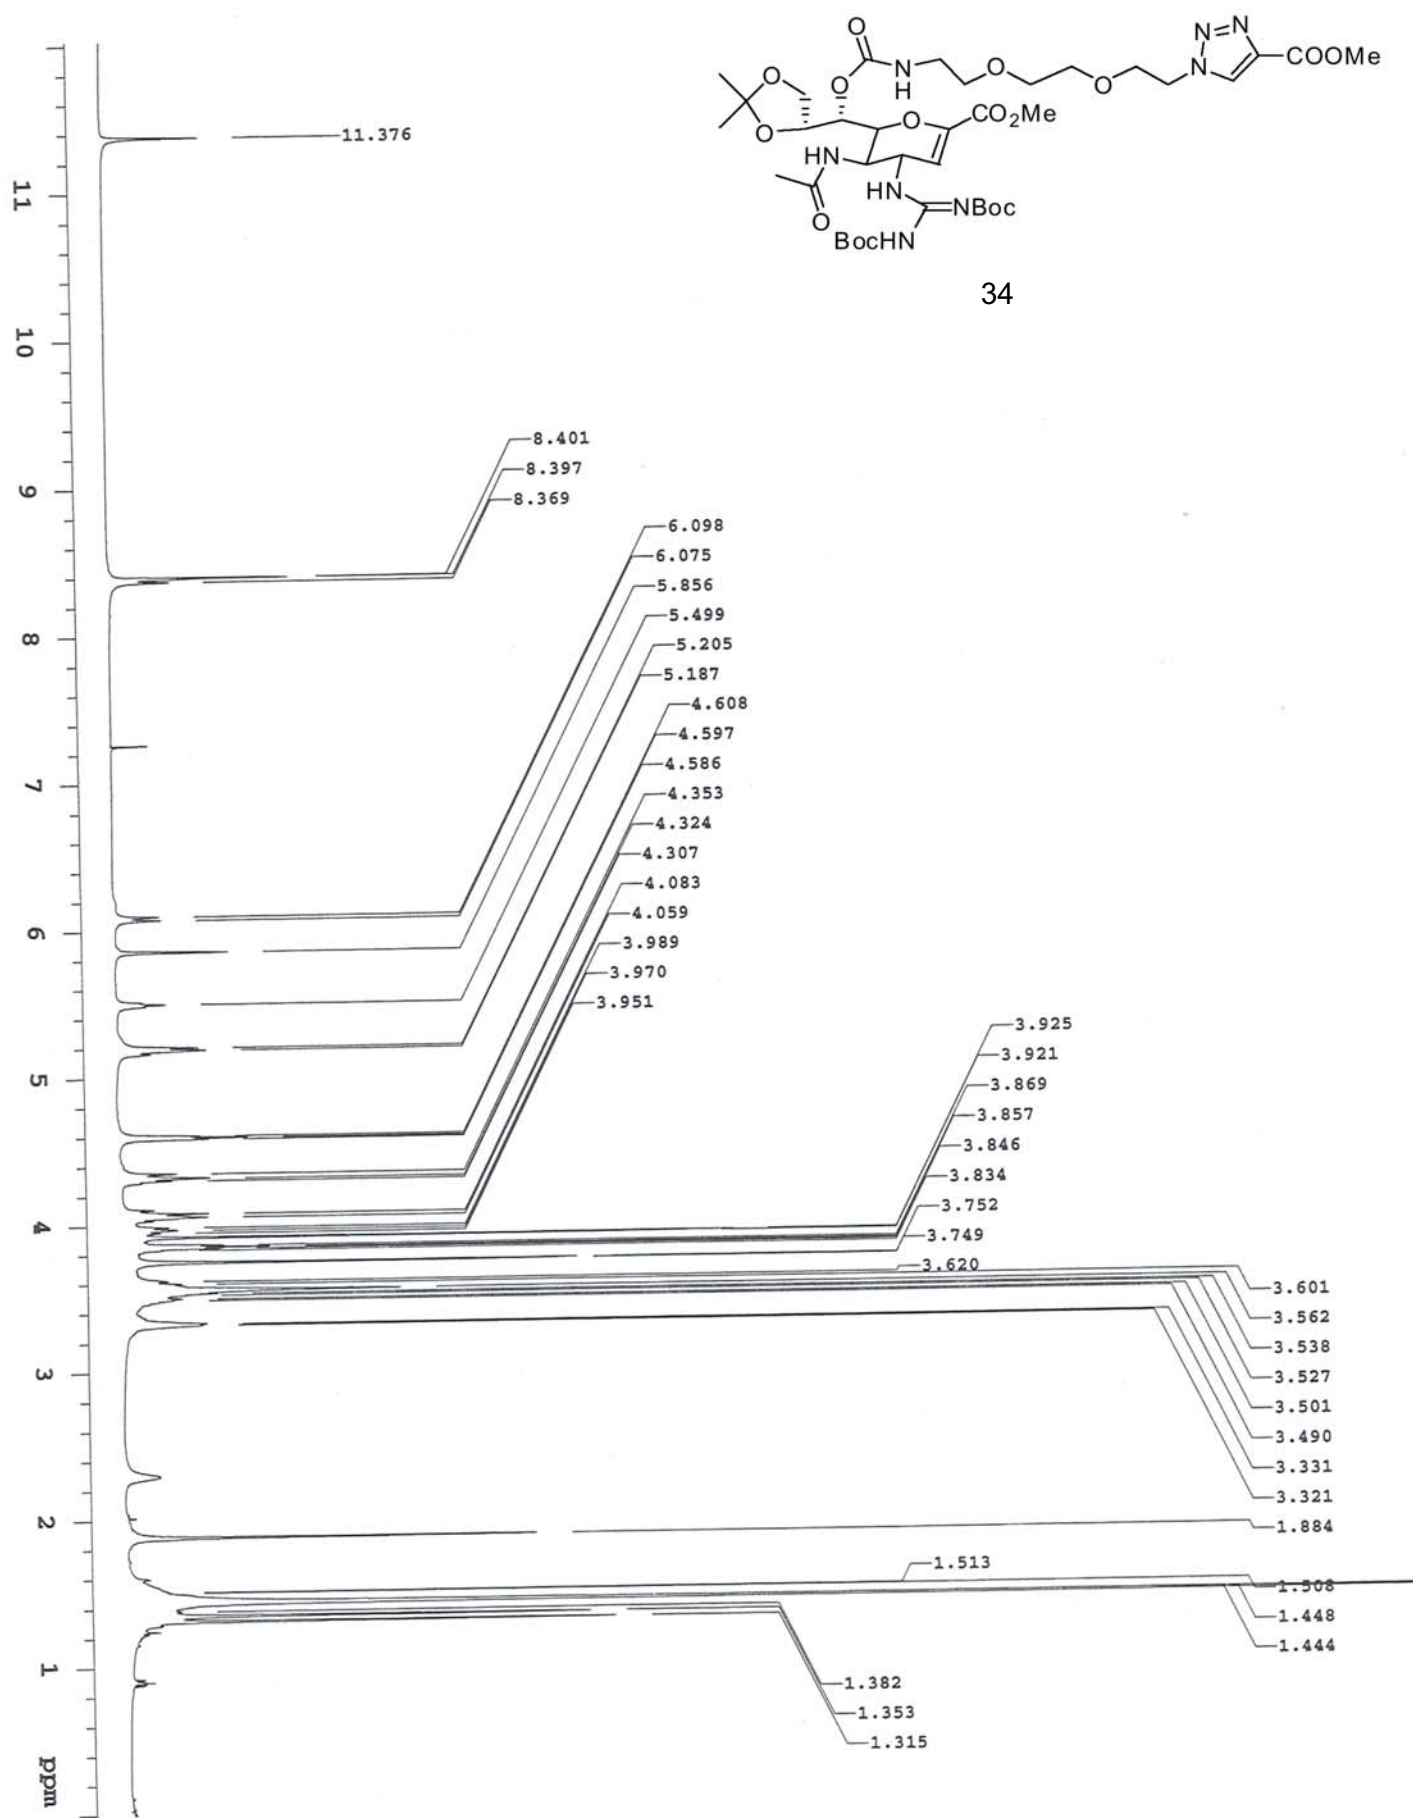

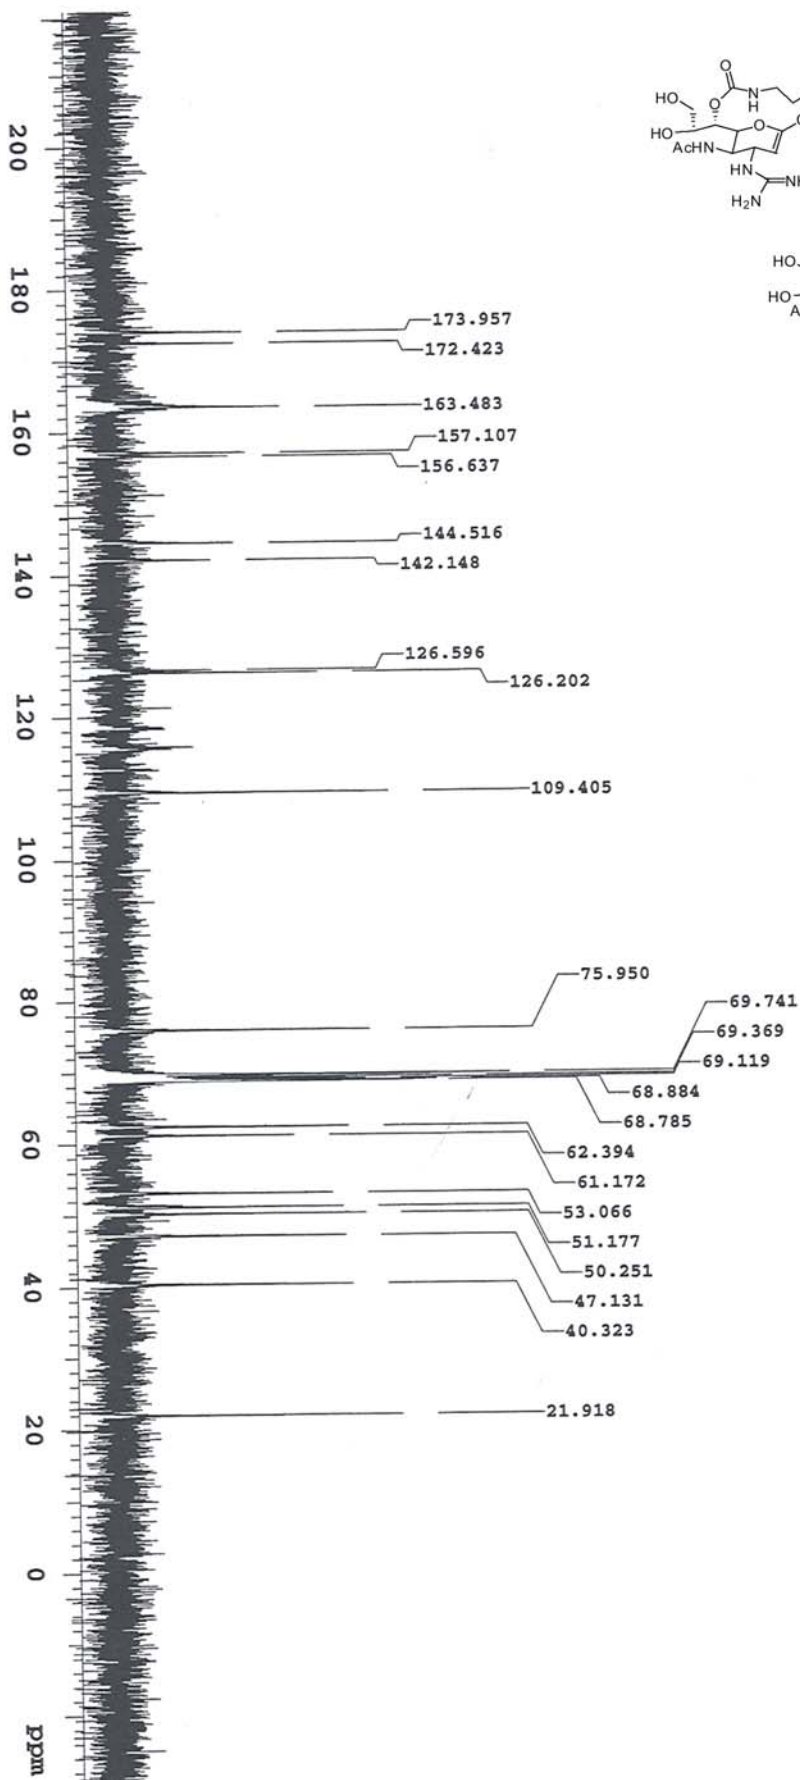

35

Pulse Sequence: s2pul

Solvent: CD3OD  
Ambient temperature  
INOVA-400 "nmr400"

Relax. delay 1.000 sec  
Pulse 56.8 degrees  
Acq. time 3.744 sec  
Width 6000.6 Hz  
16 repetitions  
OBSERVE H1, 399.7691547 MHz  
DATA PROCESSING  
FT size 65536  
Total time 1 min, 35 sec

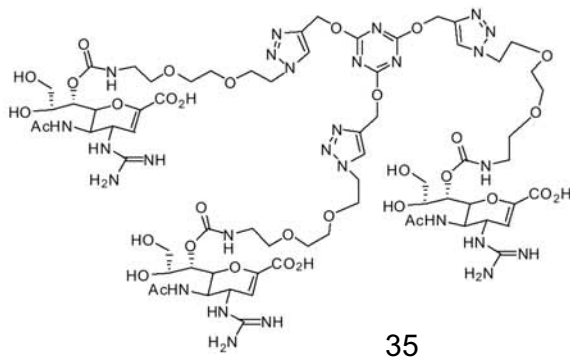

35

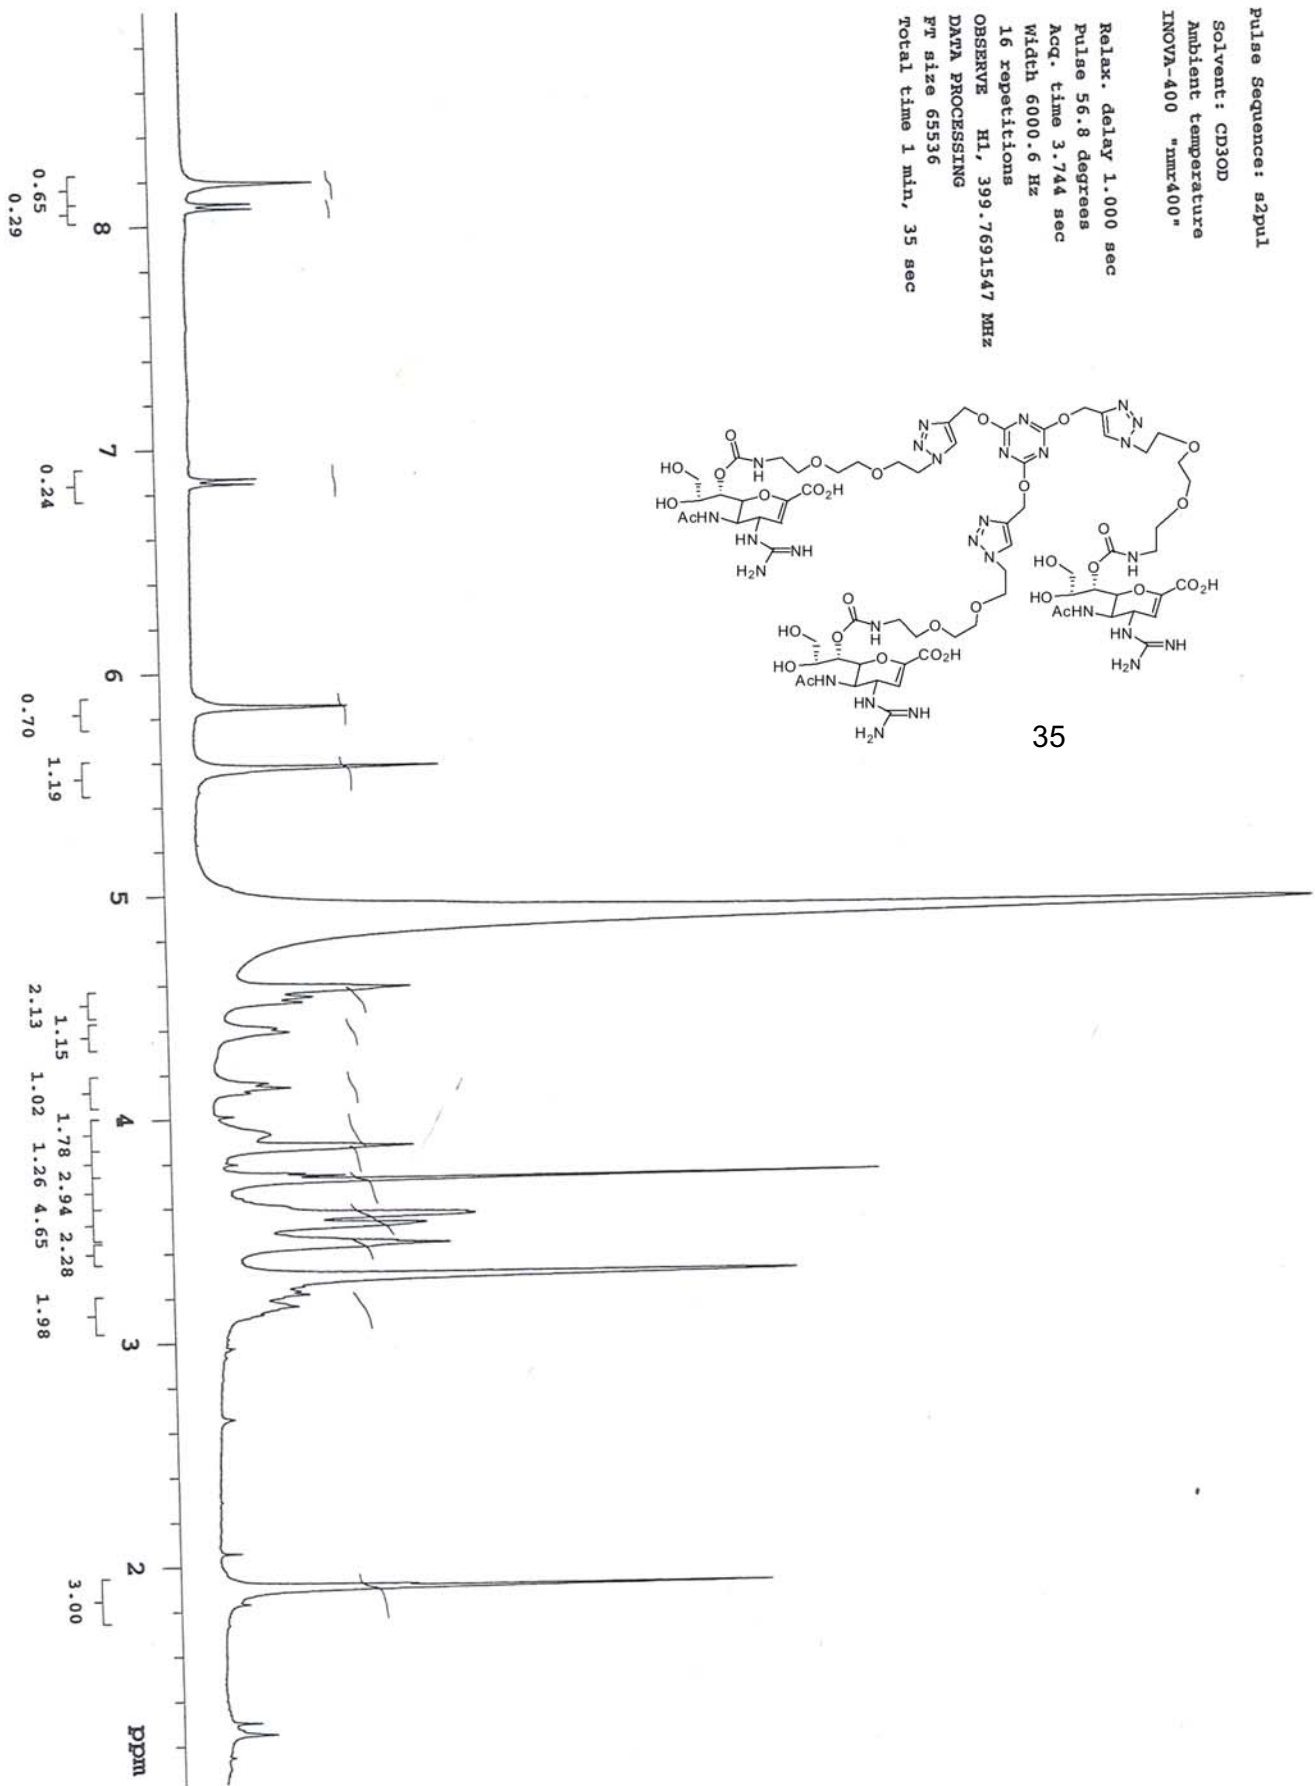

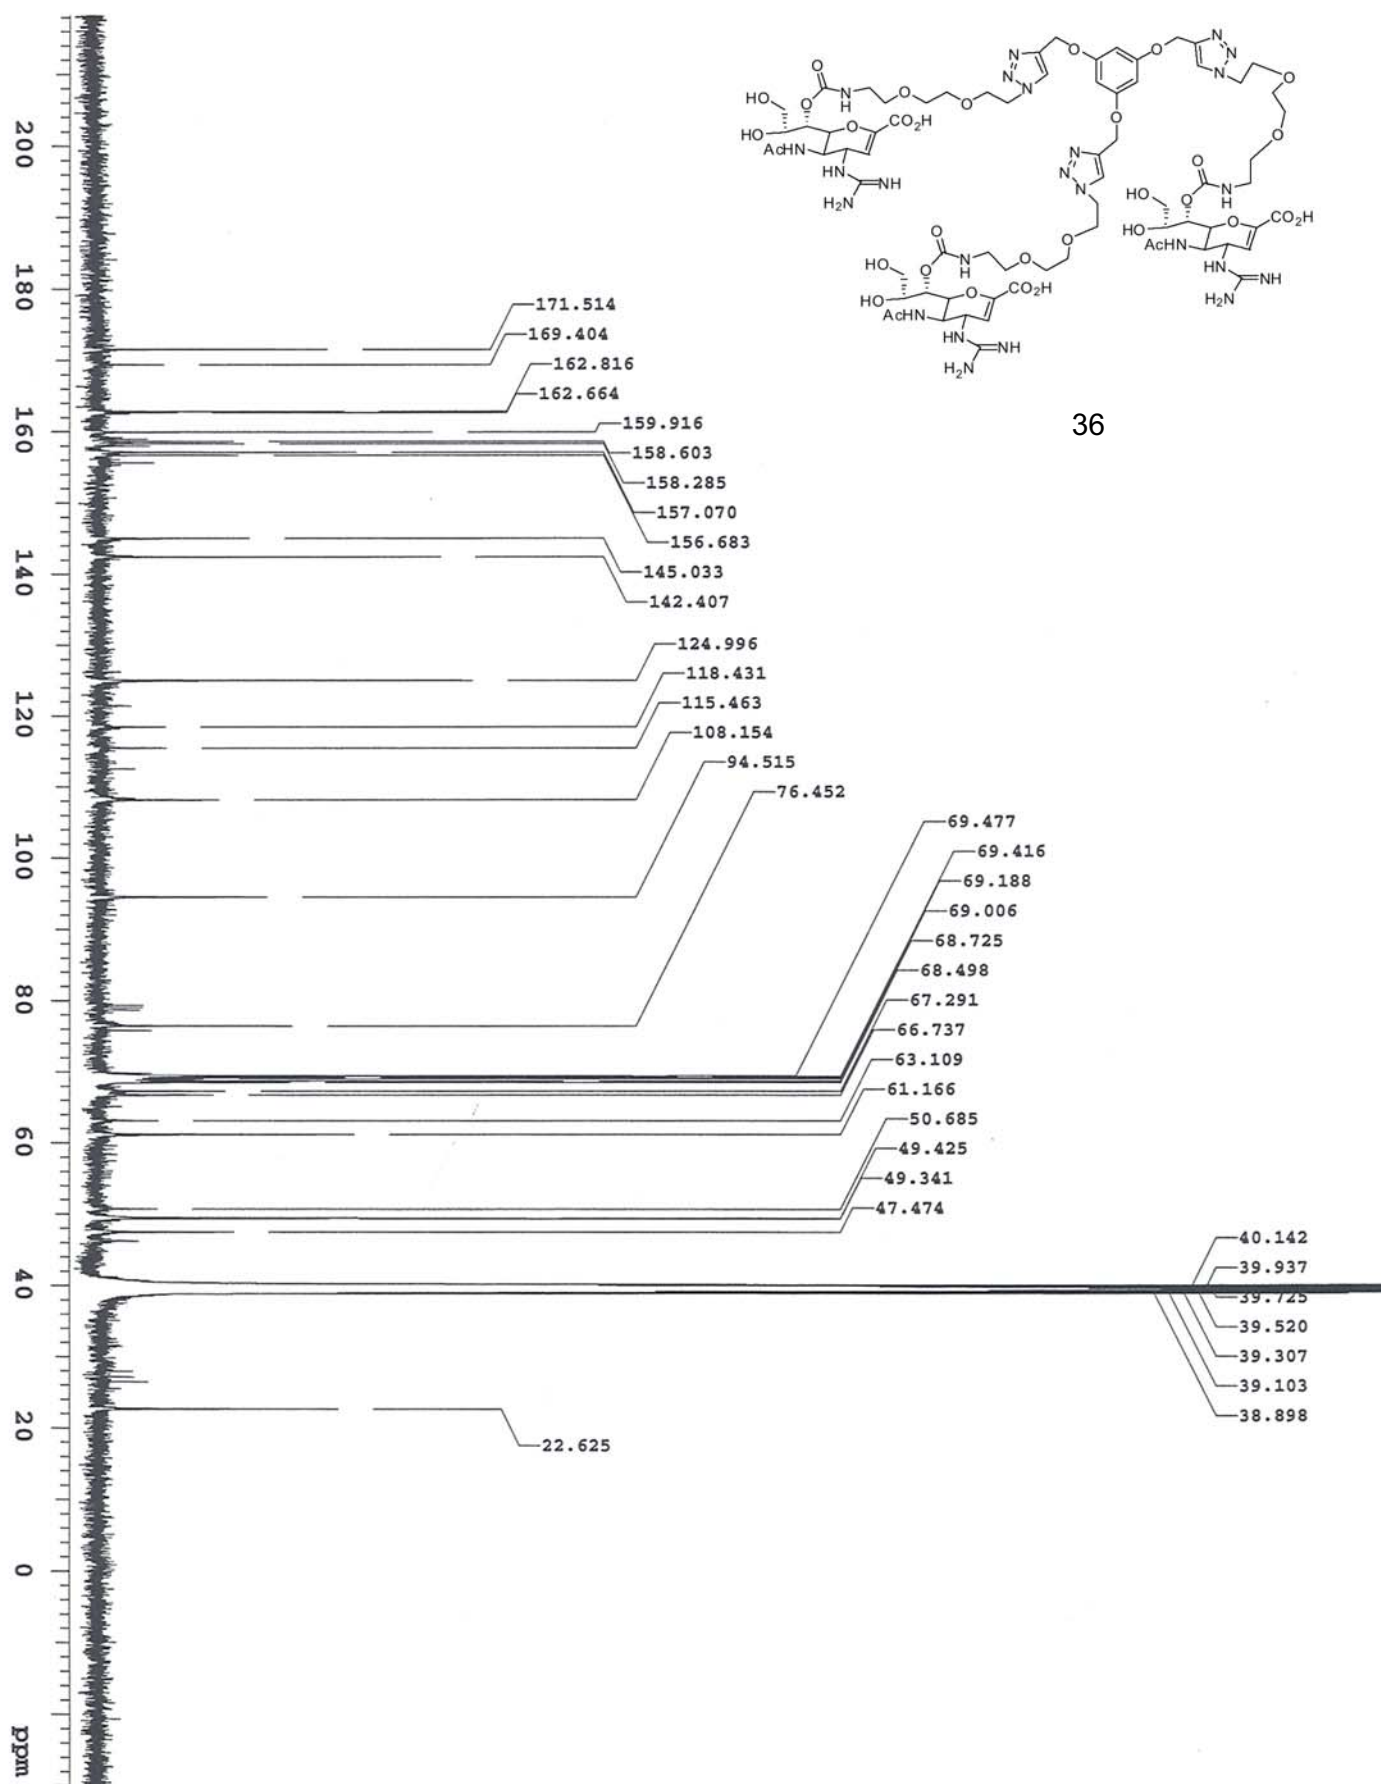

36

Pulse Sequence: presat

Solvent: D2O  
Ambient temperature  
INNOVA-400 "nmr400"

Relax. delay 1.000 sec  
Pulse 48.6 degrees  
Acq. time 2.666 sec  
Width 6000.6 Hz  
100 repetitions  
OBSERVE H1, 399.7685456 MHz  
DATA PROCESSING  
F1 size 32768  
Total time 8 min, 58 sec

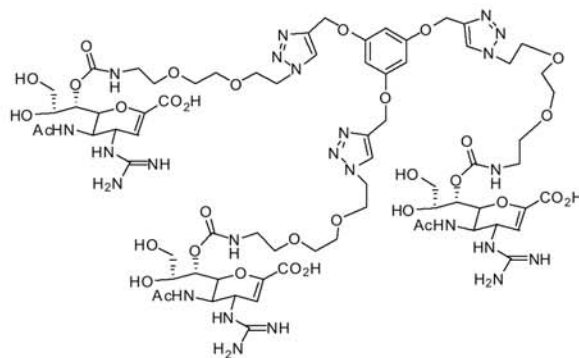

36

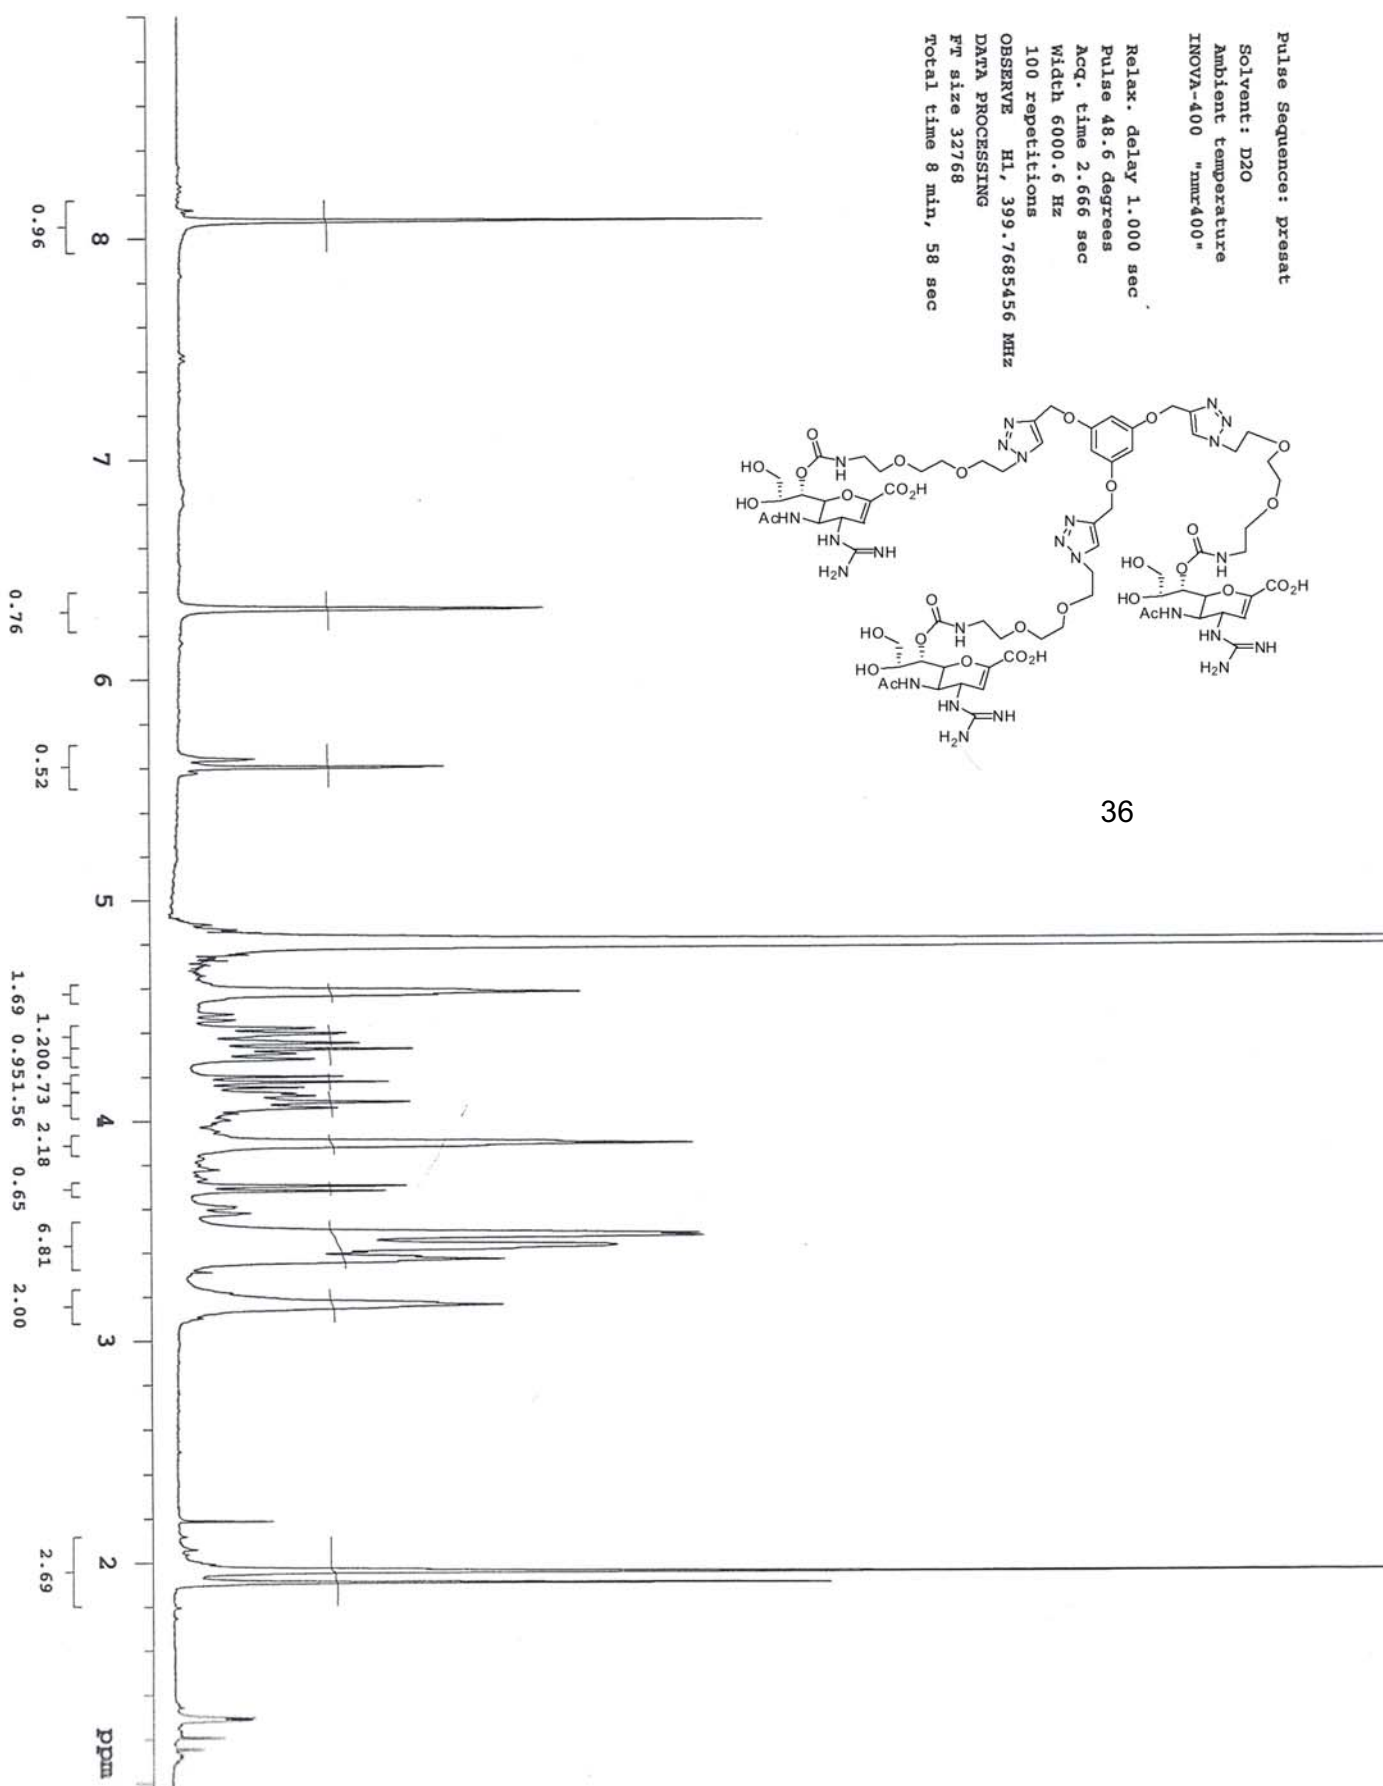

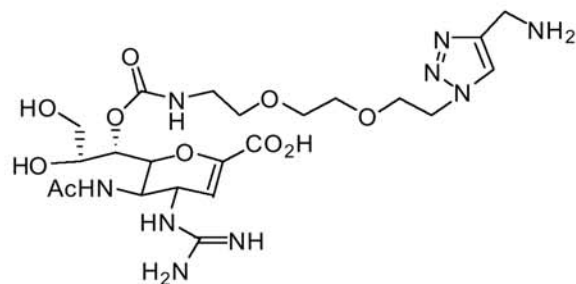

37

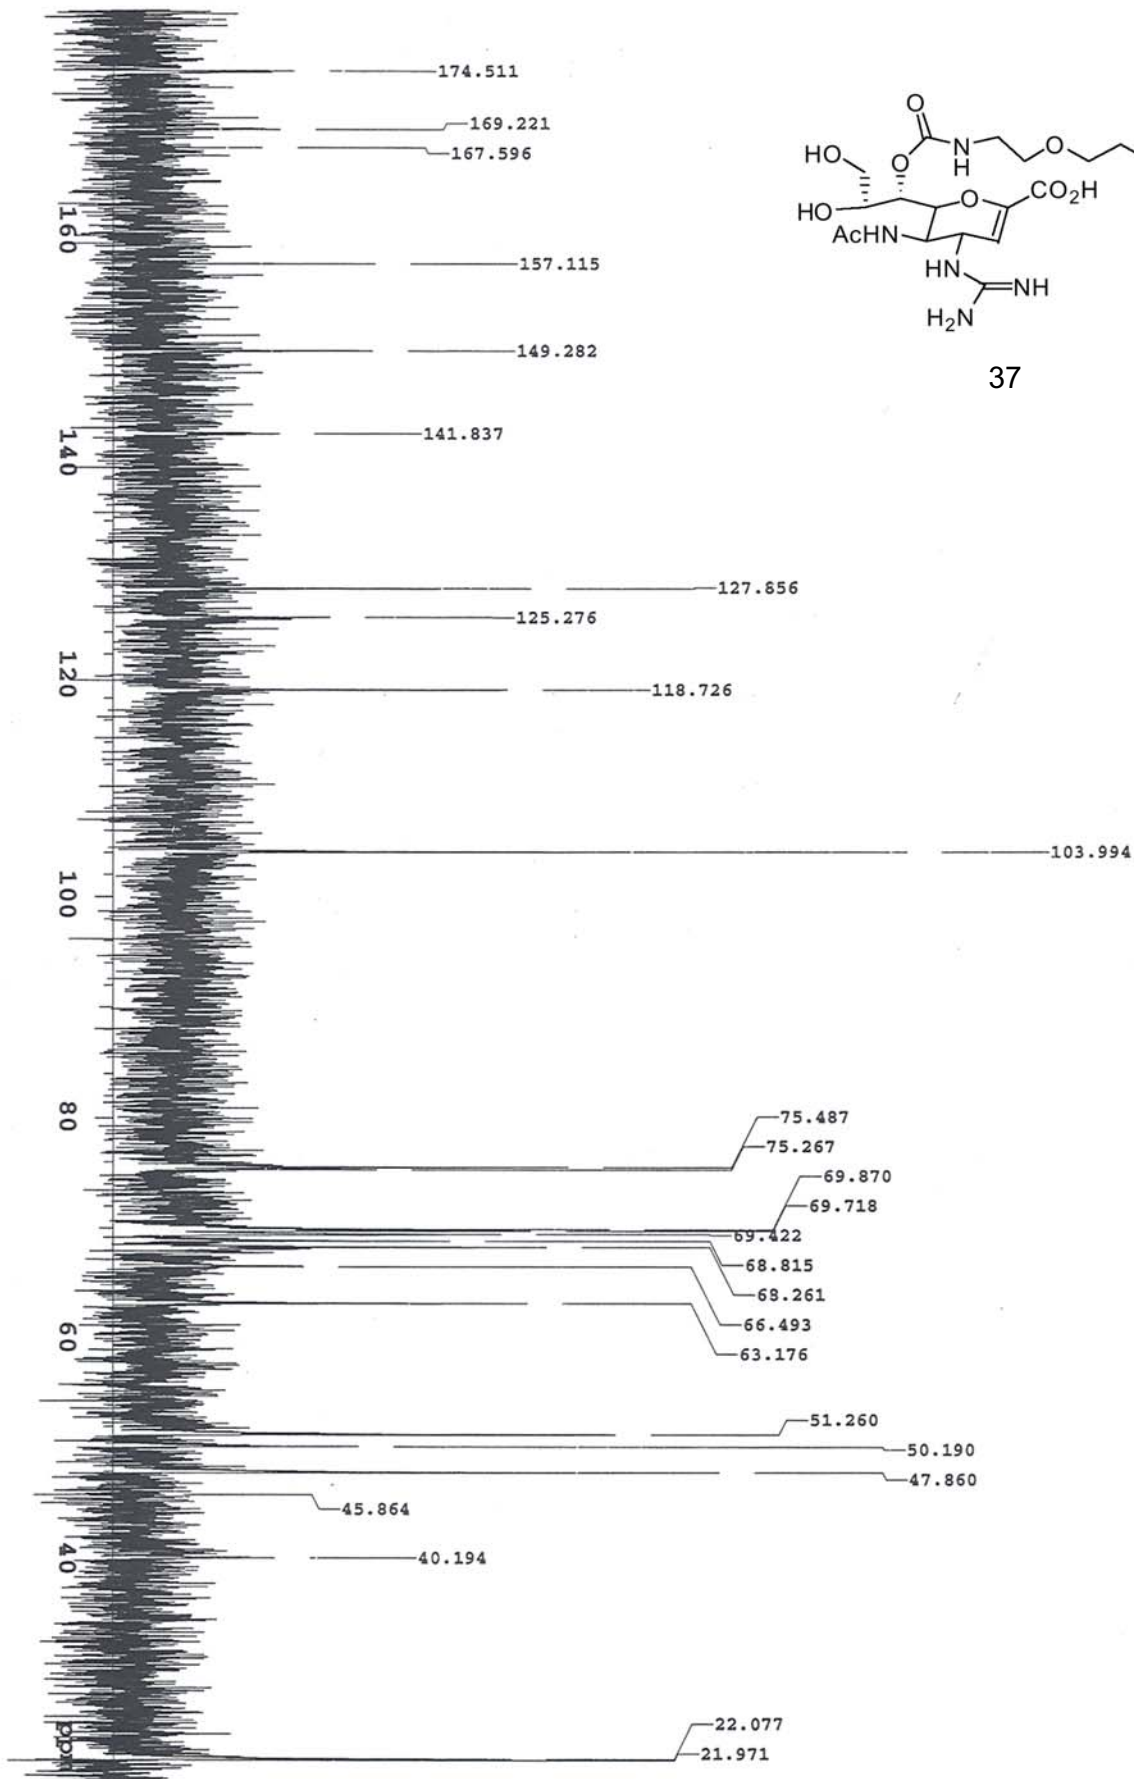

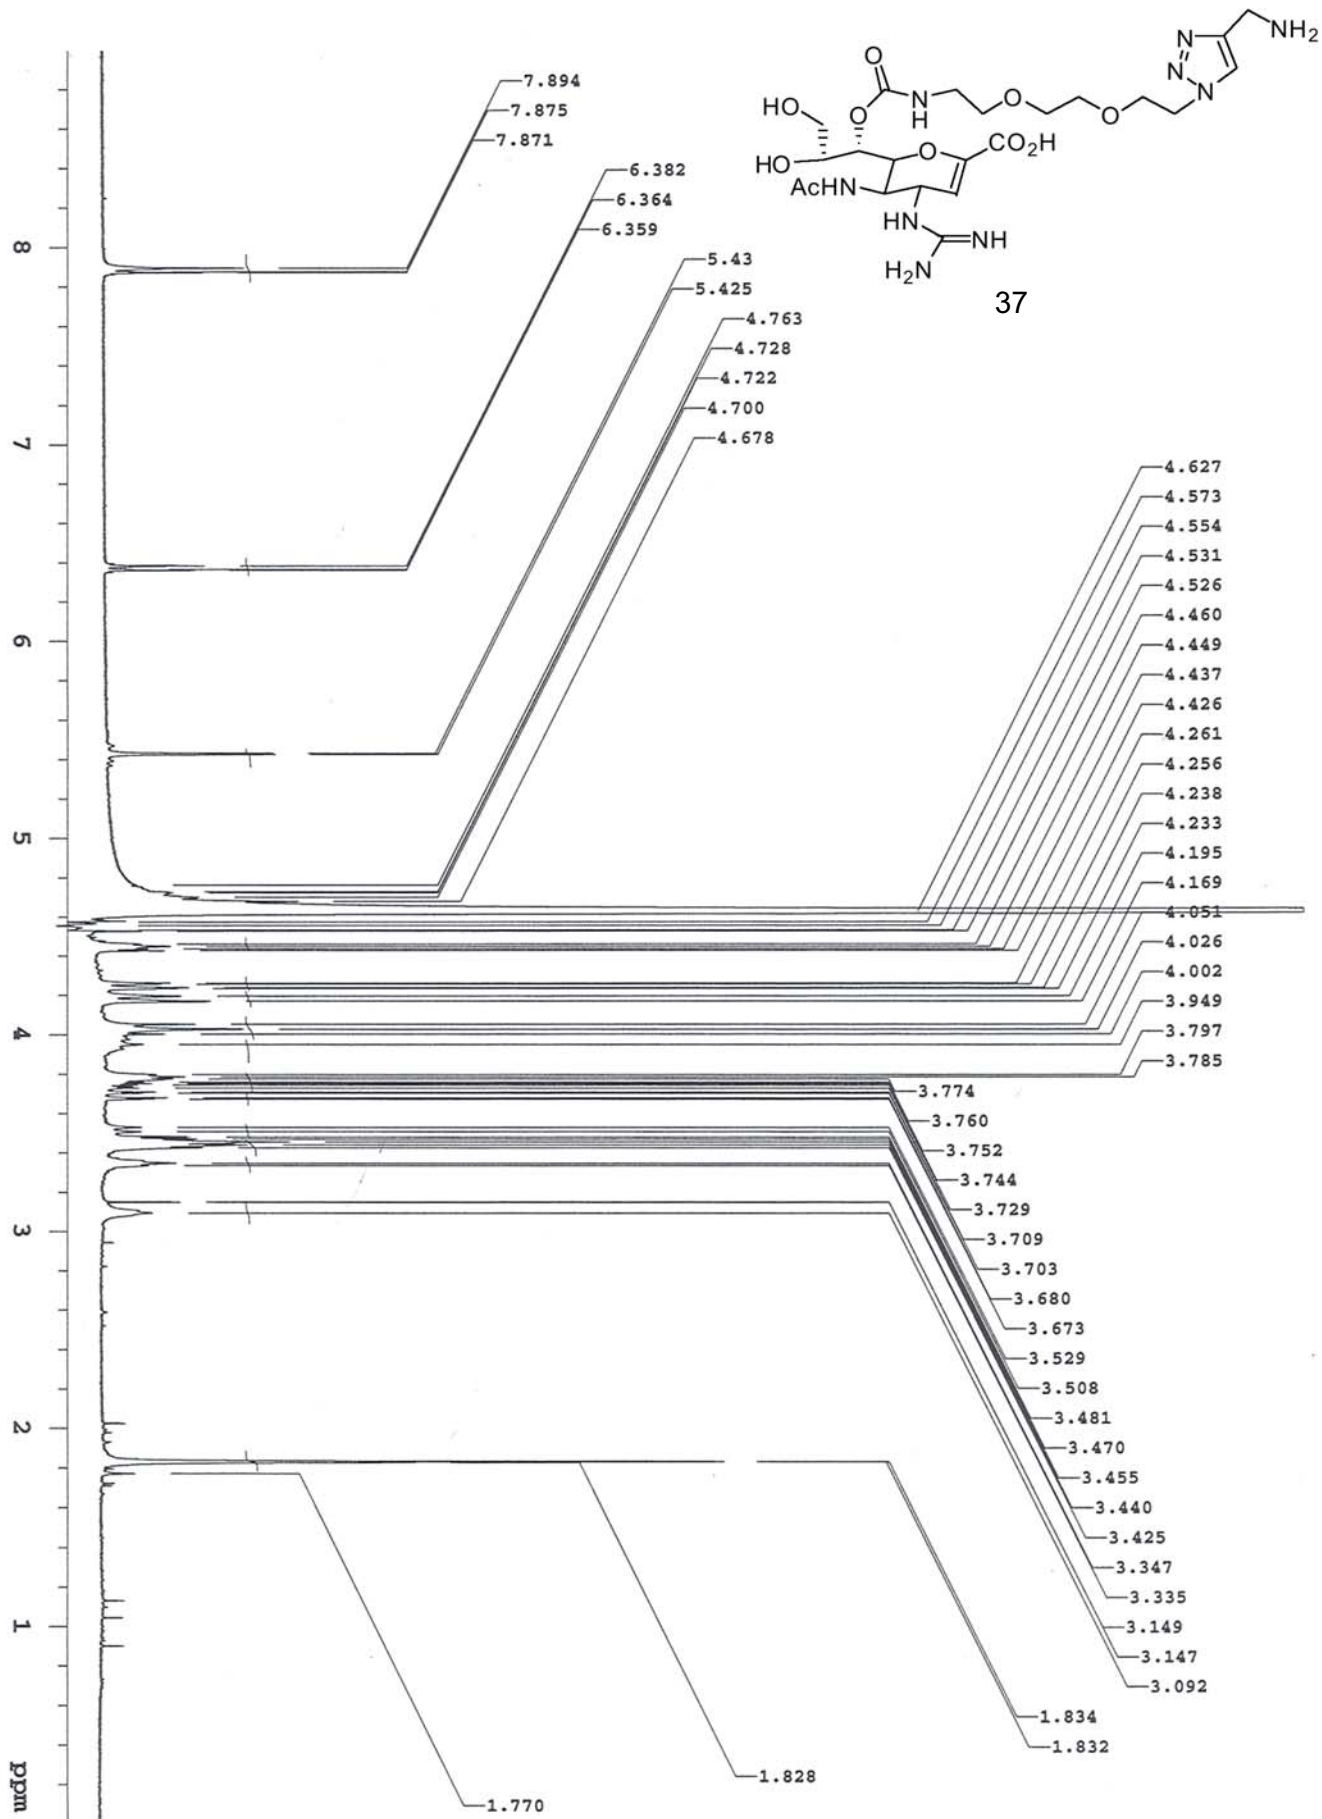



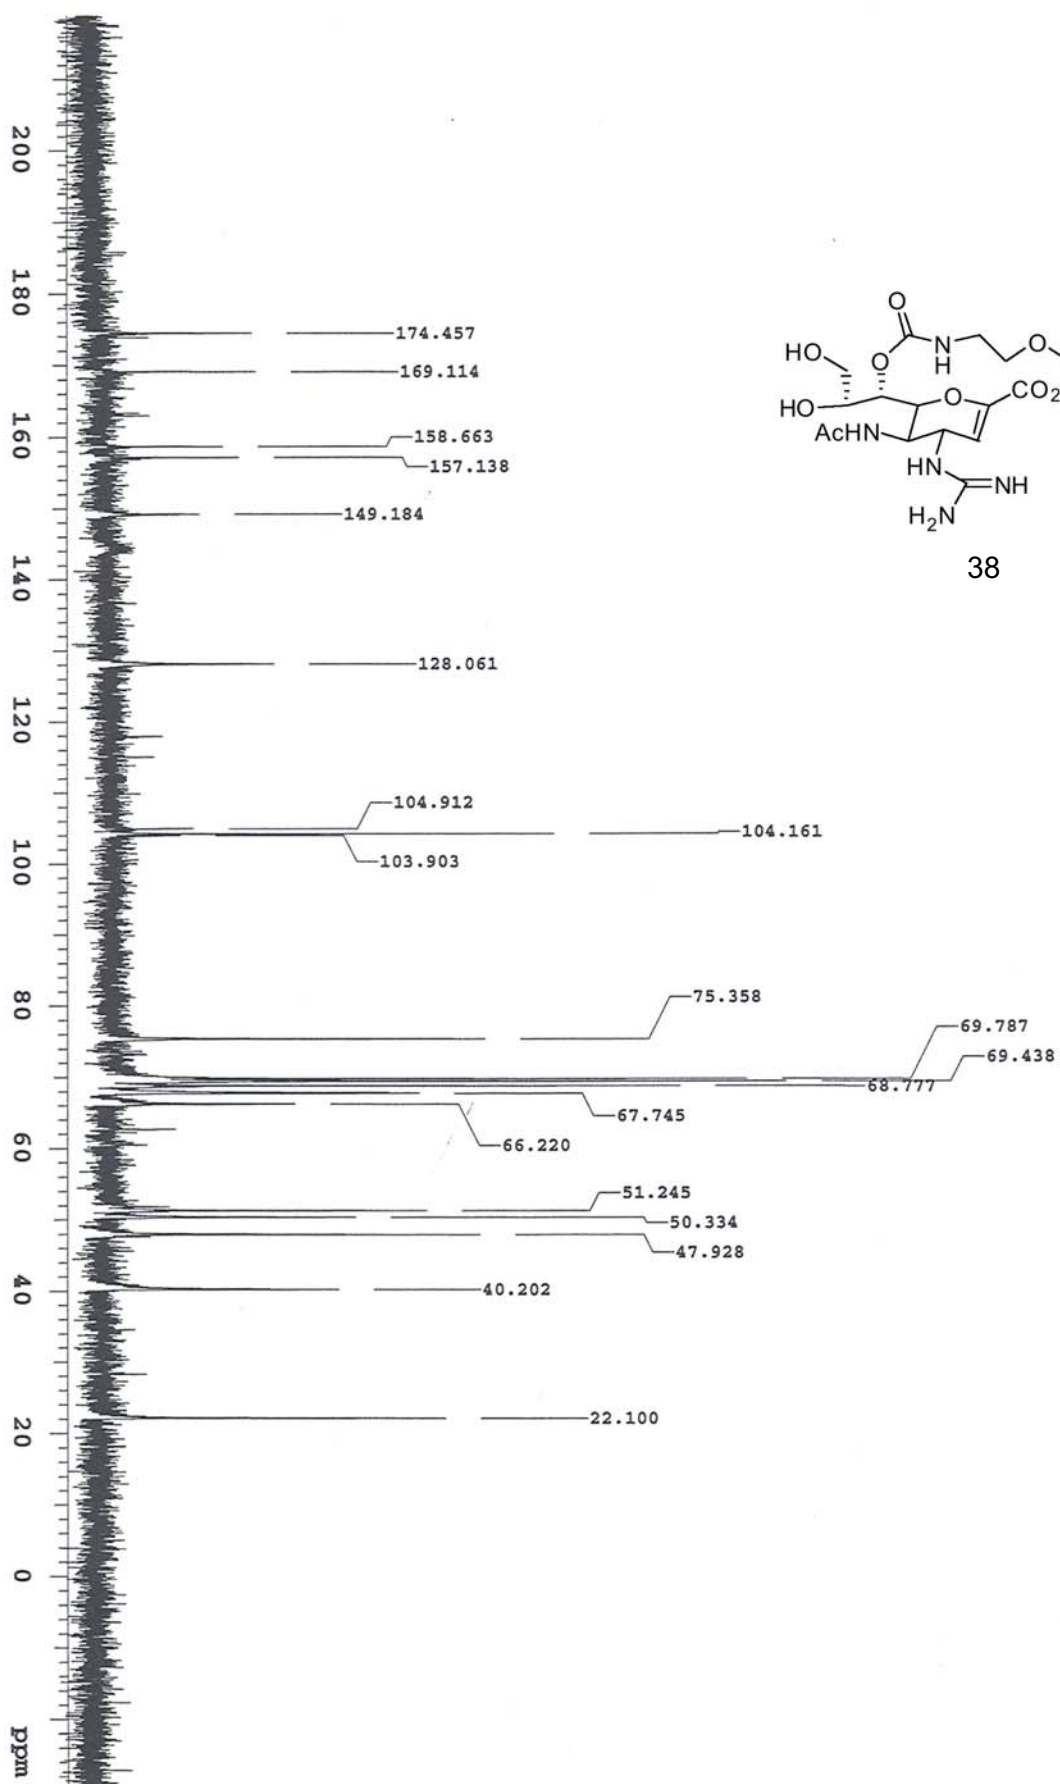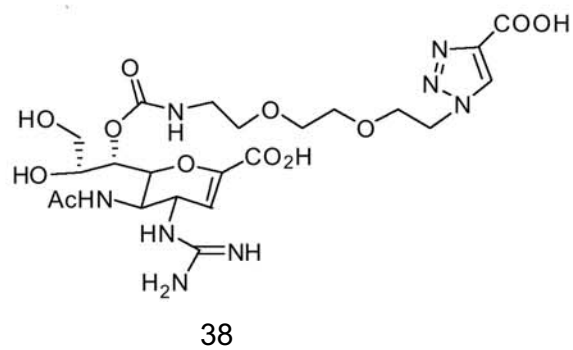

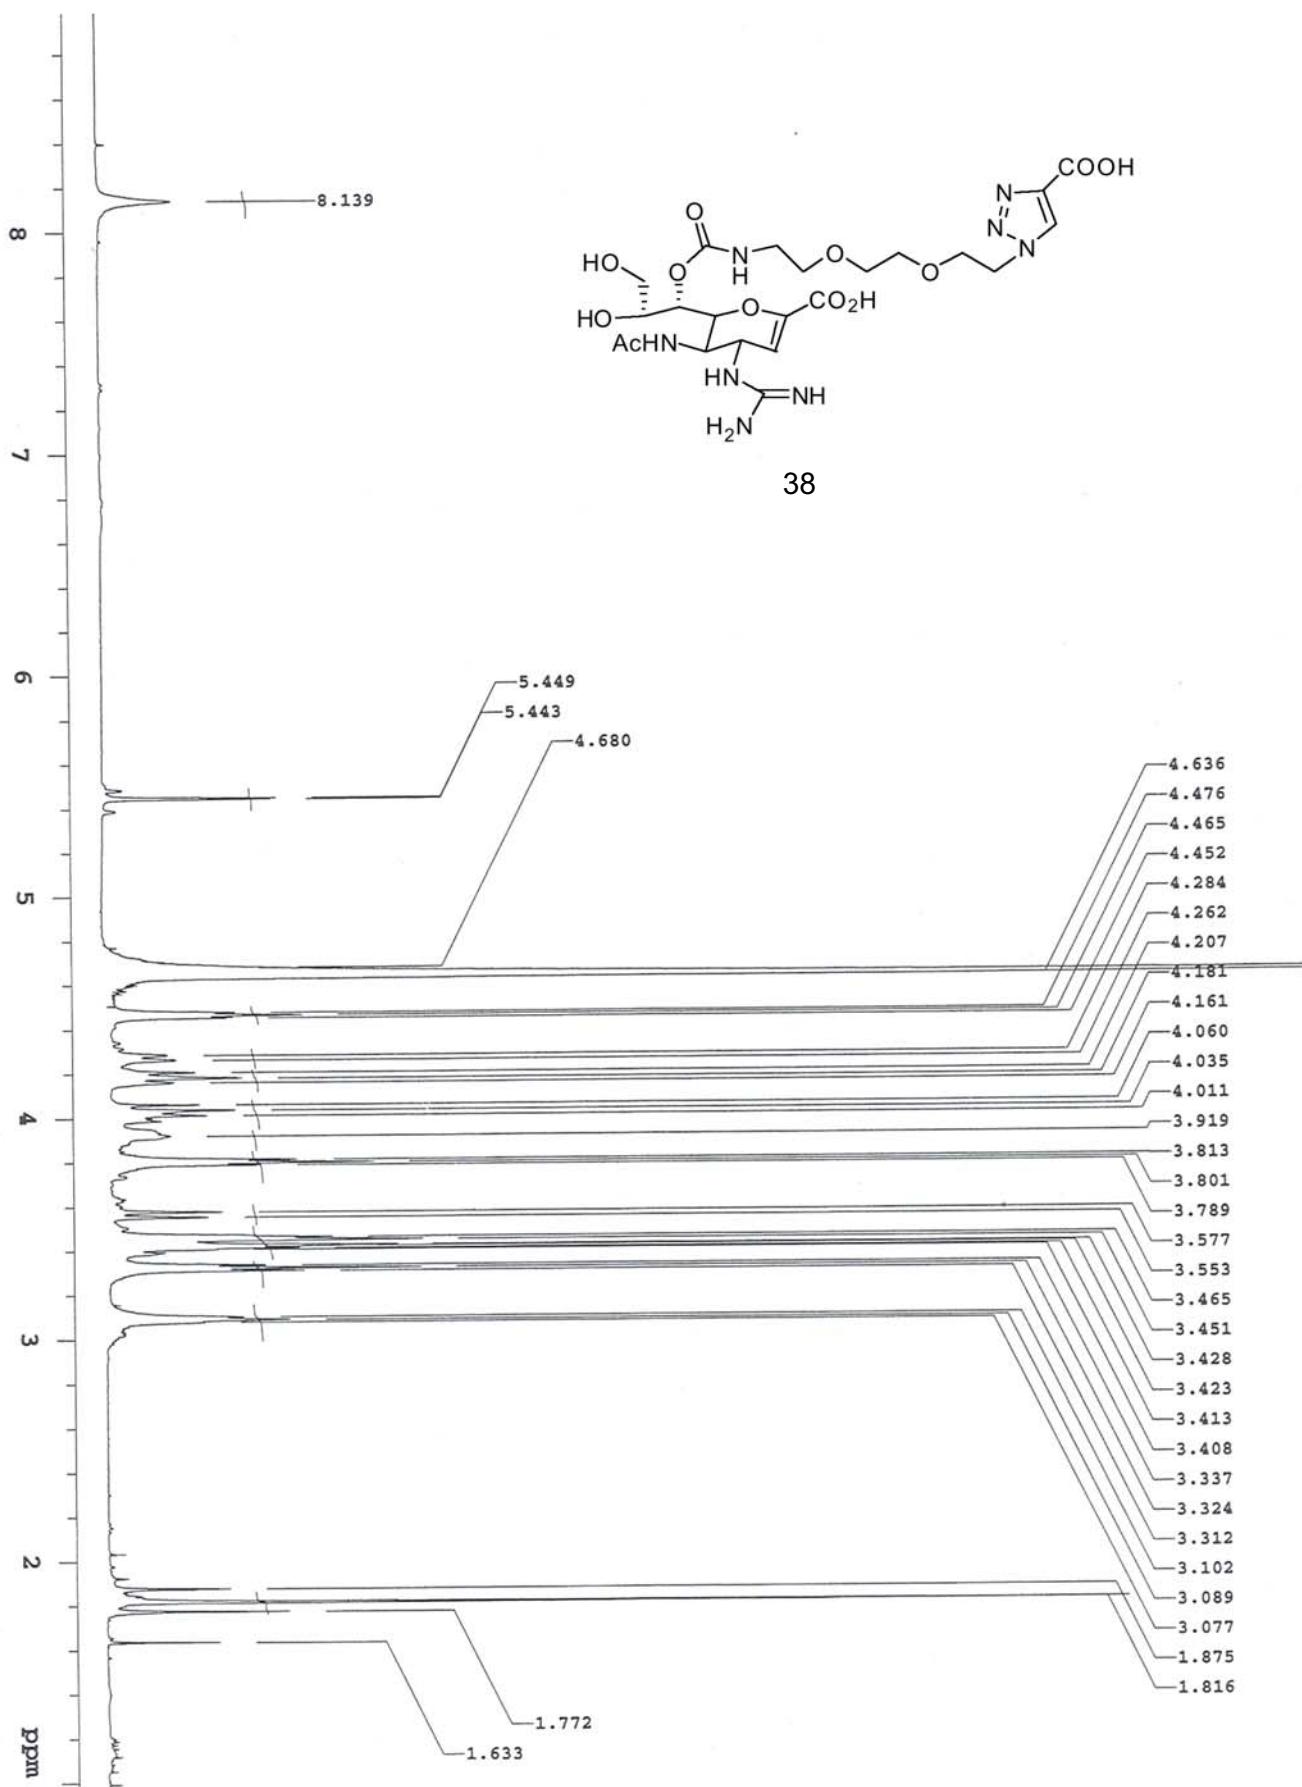

Supplement: NIHMS28275-supplement-01.pdf [file NIHMS28275-supplement-01.pdf]
